# Supplementary material for: Potential Molecular Mechanisms of Rare Anti-Tumor Immune Response by SARS-CoV-2 in Isolated Cases of Lymphomas
Source: MDPI journal article supplement (doi:10.3390/v13101927), 2021-09-25

>sp|P28908|TNR8\_HUMAN Tumor necrosis factor receptor superfamily member 8  
OS=Homo sapiens OX=9606 GN=TNFRSF8 PE=1 SV=1  
MRVLLAALGLLFLGALRAFPQDRPFEDTCHGNPSHYDKAVRRCCYRCPMGLFPTQQCPQRPTDCRKQCEPDYYLDE  
ADRCTACVTCSRDDLVEKTPCAWNSSRVCECRPGMFCSTSAVNSCARCFHVSVCAGMIVKFPGTAQKNTVCEPASP  
GVSPACASPENCKEPSSGTIPQAKPTPVSPATSSASTMPVRGGTRLAQEAASKLTRAPDSPSSVGRPSSDPGLSPTQ  
PCPEGSGDCRKQCEPDYYLDEAGRCTACVSCSRDDLVEKTPCAWNSSRTCECRPGMICATSATNSCARCVYPICAA  
ETVTKPQDMAEKDTTTFEAPPLGTQPDNPTPENGEAPASTSPTQSLLVDSQASKTLPIPTSAPVALSSTGKPVLDAG  
PVLFWVILVLVVVVVGSSAFLLCRRACRKRIQKLHLCPVQTSQPKLELVDSRPRRSSTQLRSGASVTEPVAEERG  
LMSQPLMETCHSVGAAYLESPLQDASPAGGPSSPRDLPEPRVSTEHTNNKIEKIYIMKADTVIVGTVKAELPEGRG  
LAGPAEPELEEELEADHTPHYPEQETEPPLGSCSDVMLSVEEEGKEDPLPTAASGK

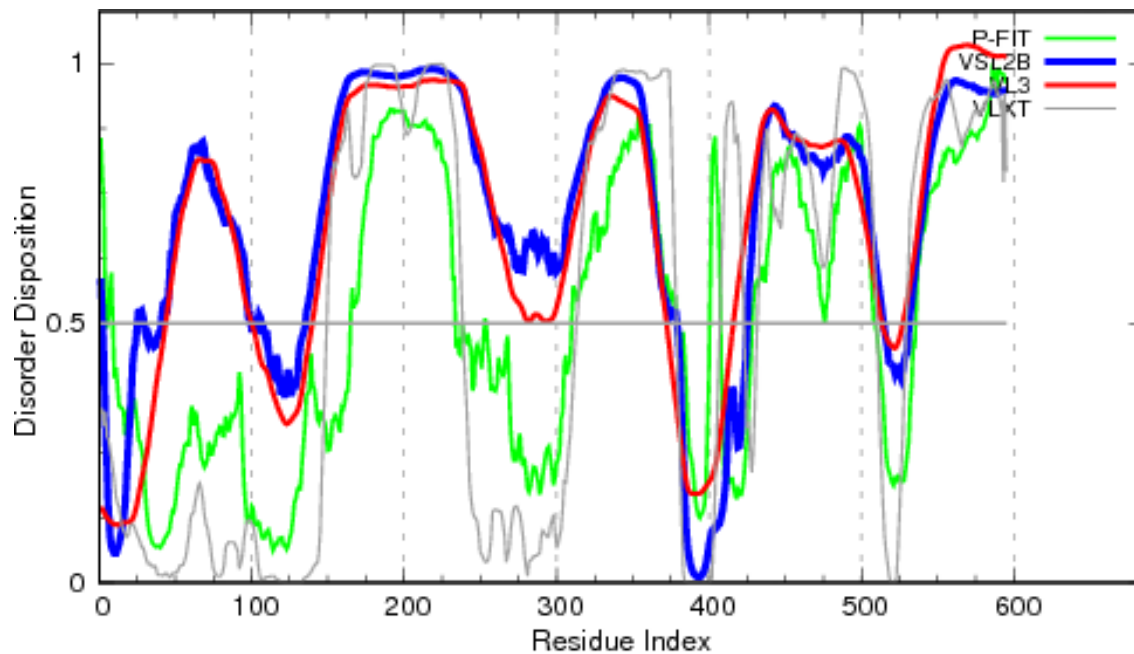

>sp|P22083|FUT4\_HUMAN Alpha-(1,3)-fucosyltransferase 4 OS=Homo sapiens  
OX=9606 GN=FUT4 PE=2 SV=3  
MRRLWGAARKPSGAGWEKEWAEAPQEAPGAWSGRLGPGRSGRKGRAVPGWASWPAHLALAARPARHLGGAGQGPRPL  
HSGTAPFHSRASGERQRRLEPQLQHESRCRSSTPADAWRAEAALPVRAMGAPWGSPTAAAGGRRGWRRRGLPWTV  
VLAAAGLTCTALITYACWGQLPPLPWASPTPSRPVGVLLWWEFPGGRDSAPRPPDCRLRFNISGCRLLTDRASYGE  
AQAVLFHHRDLVKGPPDWPPWGIQAHTAEVDLRVLDYEEAAAAAEALATSSPRPPGQRWVWMNFESPSHSPGLRS  
LASNLFNWTLSYRADSDVFVPYGYLYPRSHPGDPPSGLAPPLSRKQGLVAWVVS HWDERQARVRYHQLSQHVTVDV  
FGRGGPGQPVPEIGLLHTVARYKFYLAFENSQHLDYITEKLWRNALLAGAVPVVLGPDRANYERFVPRGAFIHVDDF  
PSASSLASYLFLDRNPAVYRRYFHWRRSYAVHITSFWDEPWCRCVCQAVQVRAGDRPKSIRNLASWFER

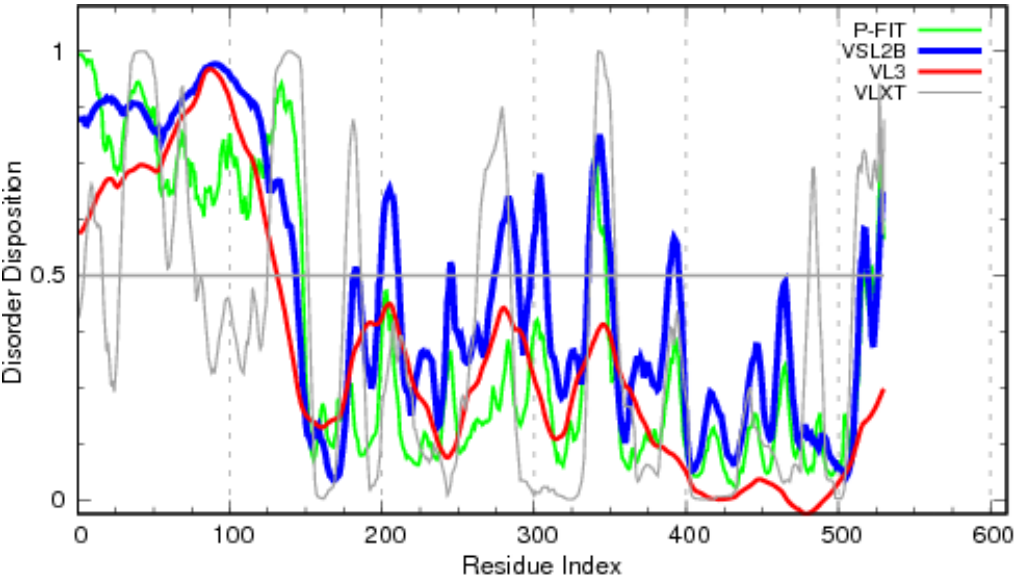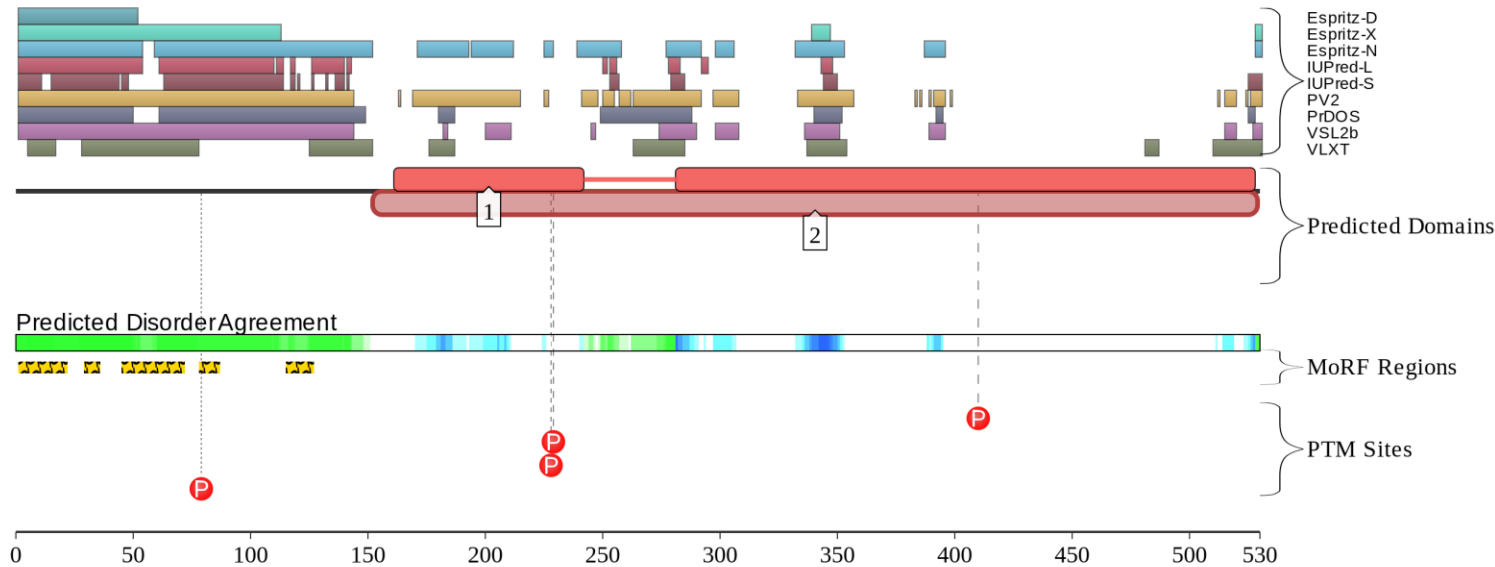

Key:

- Predicted SCOP Structure
- Weaker Support
- Pfam Conserved Domain
- Predicted Disorder
- Predicted MoRFs
- Curated PTM Site

Disorder:

- Espritz-D
- Espritz-X
- Espritz-N
- IUPred-L
- IUPred-S
- PV2
- PrDOS
- VSL2b
- VLXT

Superfamilies:

- [1] UDP-Glycosyltransferase/glycogen phosphorylase

Pfams:

- [2] Glycosyltransferase family 10 (fucosyltransferase)

```
>sp|P03230|LMP1_EBVB9 Latent membrane protein 1 OS=Epstein-Barr virus (strain
B95-8) OX=10377 GN=LMP1 PE=1 SV=1
MEHDLERGPPGPRRPPRGPPPLSSSLGLALLLLLLLALLFWLYIVMSDWTGGALLVLYSFALMLIIIIILIIIFIFRRDLL
CPLGALCILLMITLLLIALLWNLHGQALFLGIVLFIFGCLLVLGIWIYLLLEMLWRLGATIWQLLAFFLAFFLDLILL
IIALYLQQNWWTLLVDLLWLLLFLAILIWMYYHGQRHSDEHHHDDSLPHPQQATDDSGHESDSNSNEGRHLLVSGA
GDGPPLCSQNLGAPGGGPDNGPQDPDNTDDNGPQDPDNTDDNGPHDPLPQDPDNTDDNGPQDPDNTDDNGPHDPLPH
SPSDSAGNDGGPPQLTEEEVENKGGDQGPPLMTDGGGGHSHDSGHGGGDPHLPTLLLGSSSGSGDDDDPHGPPVQLSYY
D
```

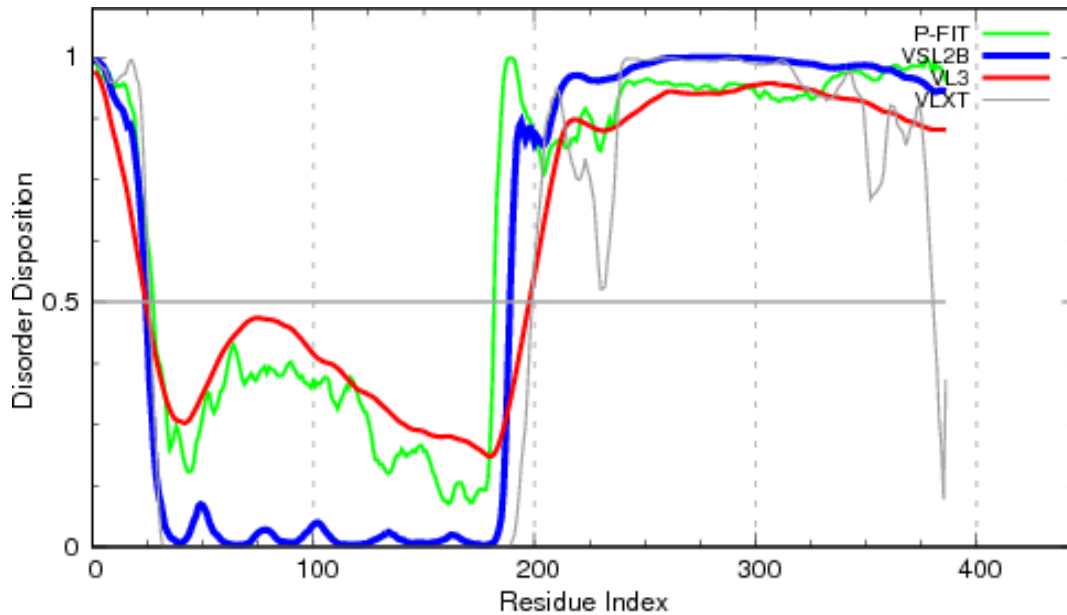

```
>sp|P0DTC5|VME1_SARS2 Membrane protein OS=Severe acute respiratory syndrome
coronavirus 2 OX=2697049 GN=M PE=1 SV=1
MADSNGTITVEELKKLLEQWNLVIGFLFLTWICLLQFAYANRNRFLYIIKLIFLWLLWPVTLACFVLAAYRINWIT
GGIAIAMACLVGLMWLSYFIASFRLFARTRSMWSFNPETNILLNVPLHGTILTRPLLESELVIGAVILRGHLRIAGH
HLGRCDIKDLPKEITVATSRTLSTYYKLGASQVRVAGDSGFAAYSRYRIGNYKLNTDHSSSSDNIALLVQ
```

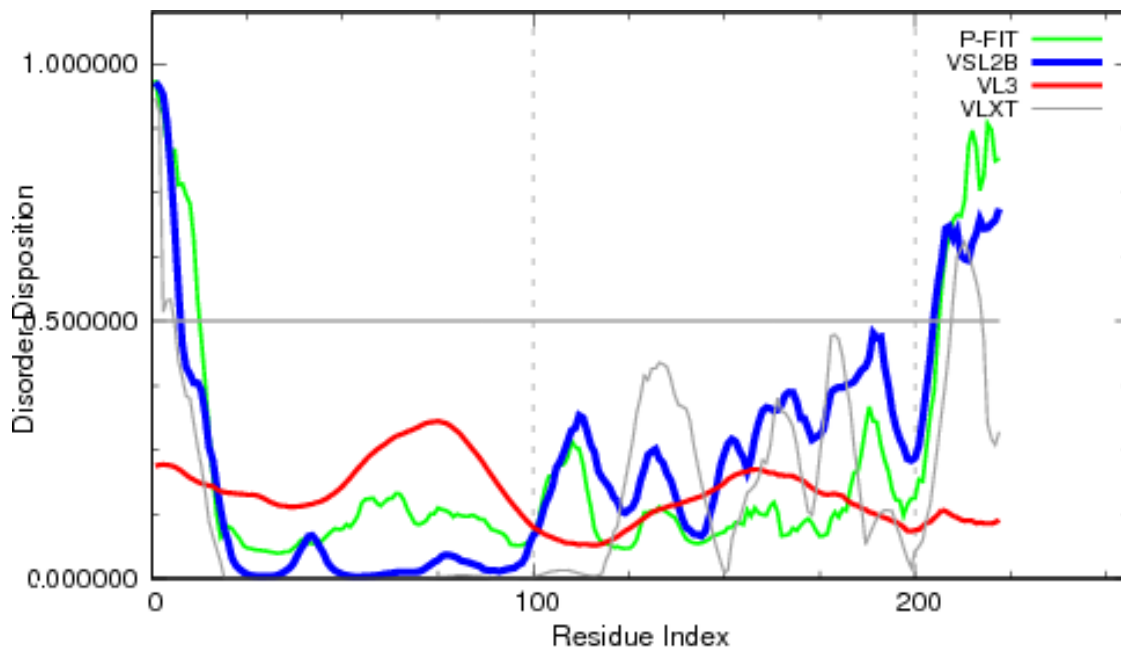

Supplement: s1 [file s1]
