# Supplementary material for: Potential Molecular Mechanisms of Rare Anti-Tumor Immune Response by SARS-CoV-2 in Isolated Cases of Lymphomas
Source: MDPI journal article supplement (doi:10.3390/v13101927), 2021-09-25

**Fig S1:** The Ramachandran plot of the refined CD30 structure.

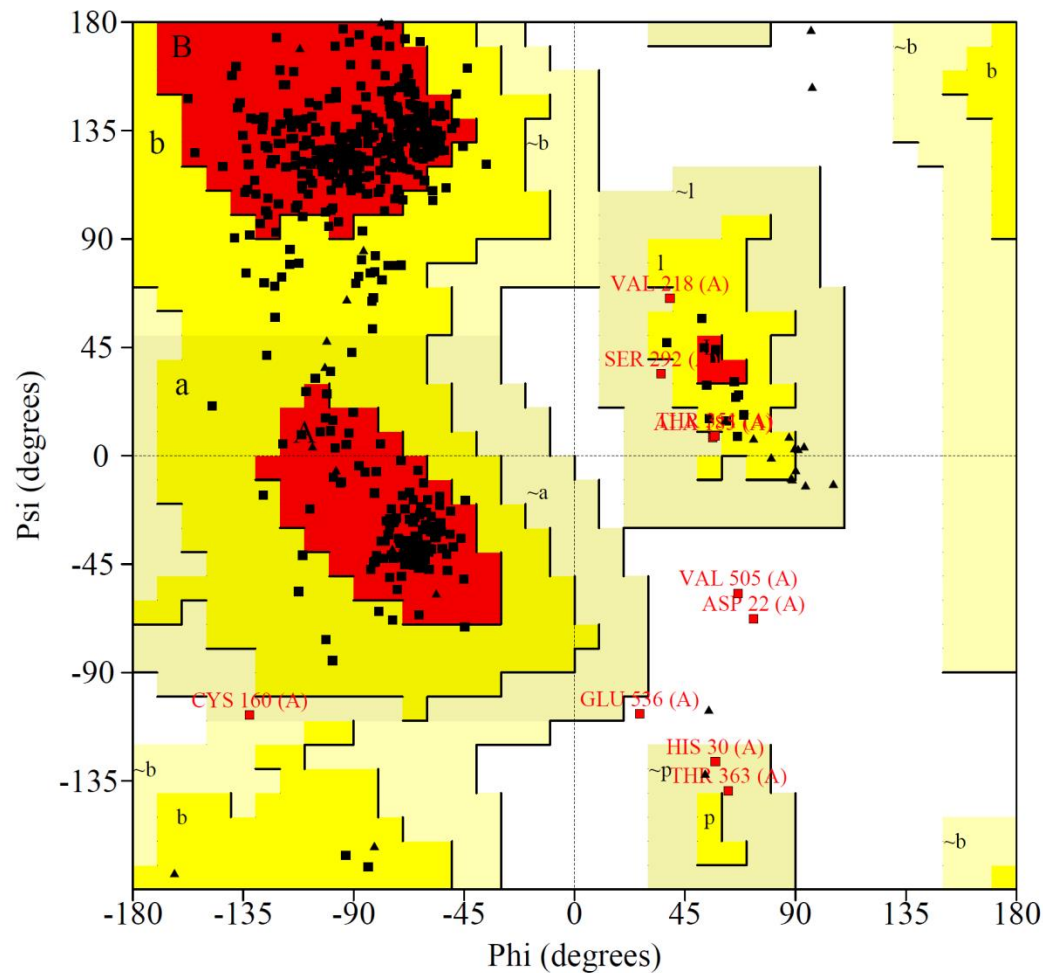

| Plot statistics                                      |     |        |
|------------------------------------------------------|-----|--------|
| Residues in most favoured regions [A,B,L]            | 428 | 87.0%  |
| Residues in additional allowed regions [a,b,l,p]     | 54  | 11.0%  |
| Residues in generously allowed regions [~a,~b,~l,~p] | 7   | 1.4%   |
| Residues in disallowed regions                       | 3   | 0.6%   |
| -----                                                |     |        |
| Number of non-glycine and non-proline residues       | 492 | 100.0% |
| Number of end-residues (excl. Gly and Pro)           | 2   |        |
| Number of glycine residues (shown as triangles)      | 34  |        |
| Number of proline residues                           | 67  |        |
| -----                                                |     |        |
| Total number of residues                             | 595 |        |

**Fig S2:** The Ramachandran plot of the refined CD15 structure.

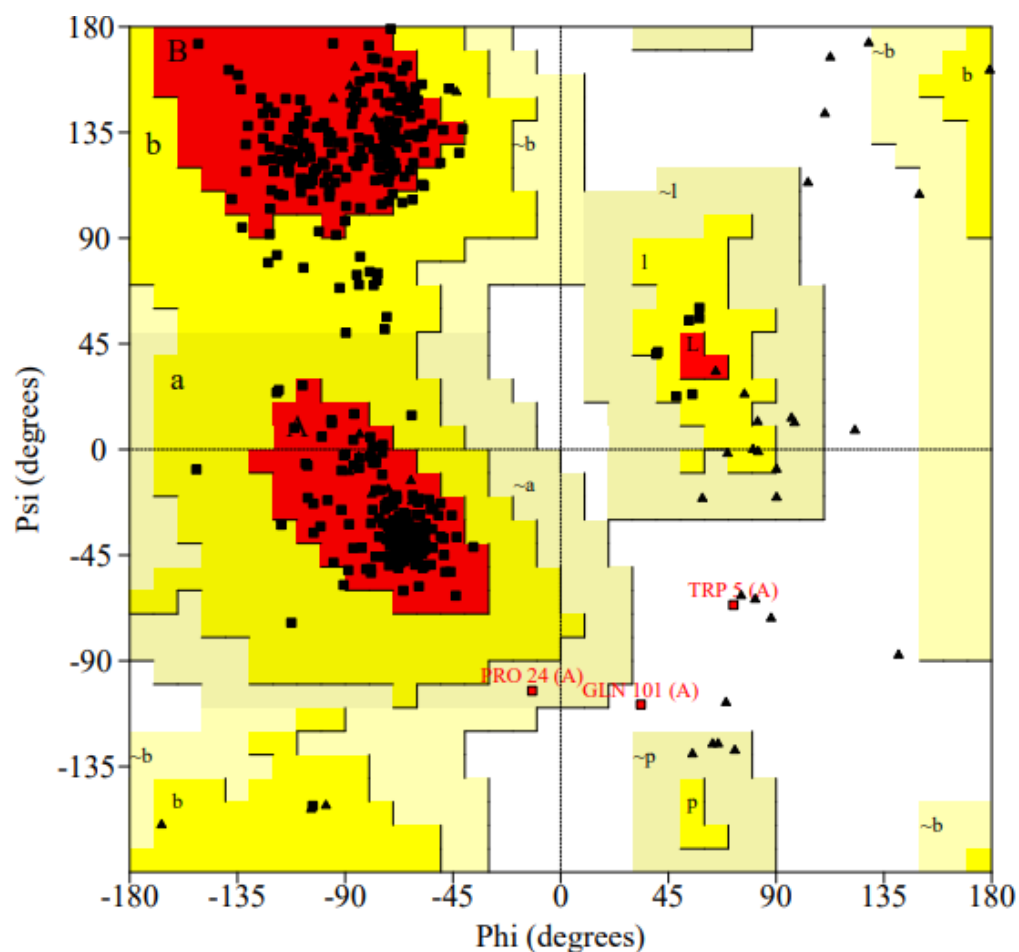

Plot statistics

|                                                      |     |        |
|------------------------------------------------------|-----|--------|
| Residues in most favoured regions [A,B,L]            | 393 | 92.0%  |
| Residues in additional allowed regions [a,b,l,p]     | 32  | 7.5%   |
| Residues in generously allowed regions [~a,~b,~l,~p] | 0   | 0.0%   |
| Residues in disallowed regions                       | 2   | 0.5%   |
| <hr/>                                                |     |        |
| Number of non-glycine and non-proline residues       | 427 | 100.0% |
| Number of end-residues (excl. Gly and Pro)           | 2   |        |
| Number of glycine residues (shown as triangles)      | 47  |        |
| Number of proline residues                           | 54  |        |
| <hr/>                                                |     |        |
| Total number of residues                             | 530 |        |

**Fig S3:** The Ramachandran plot of the refined SARS-CoV-2 M protein structure.

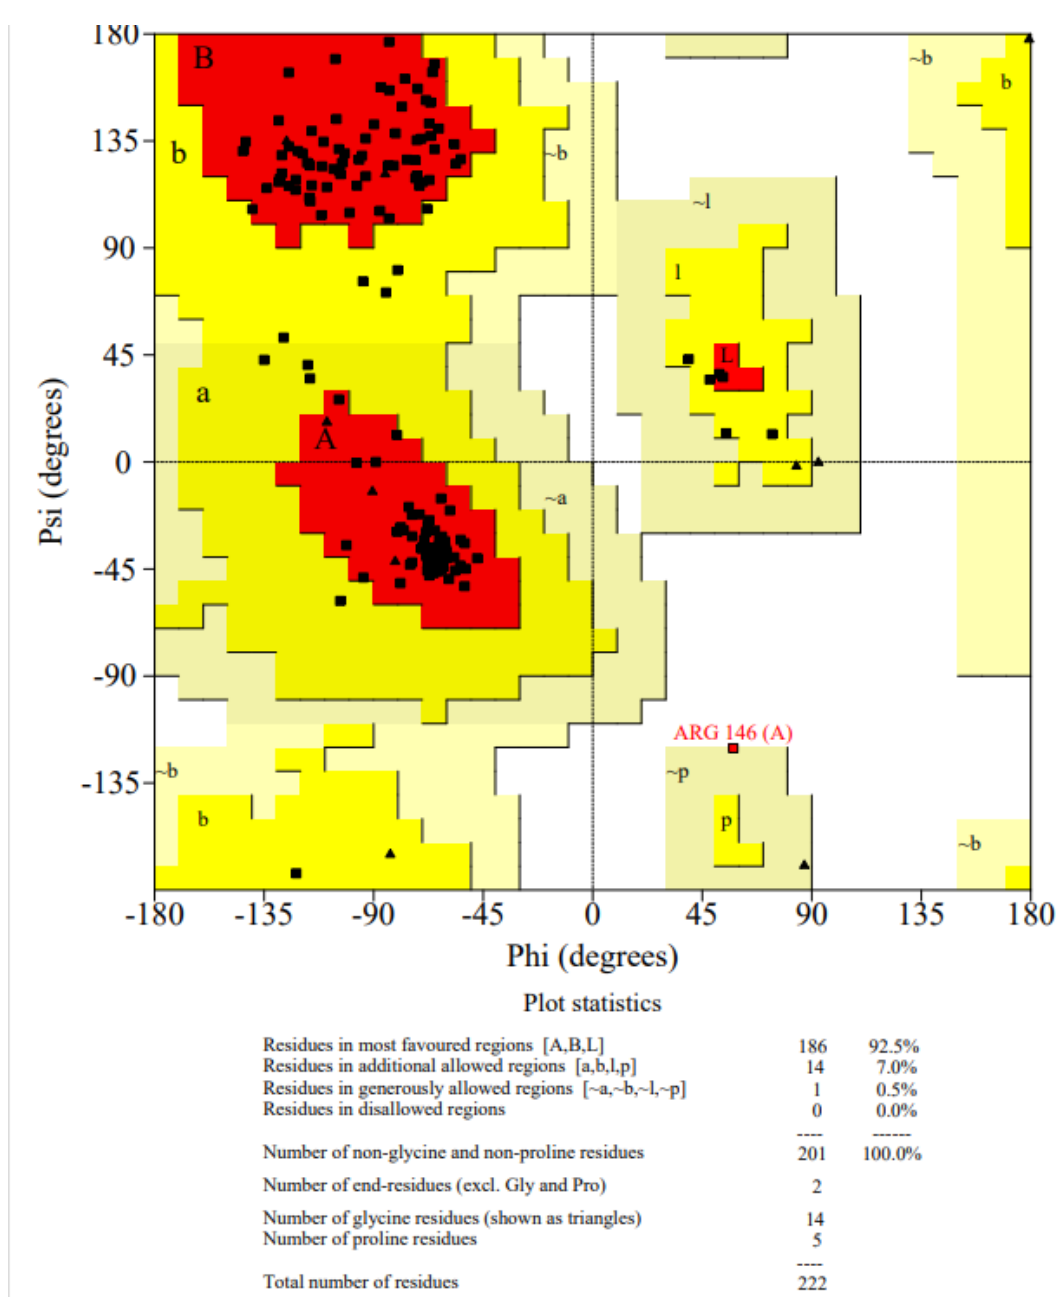

**Fig S4** : Refined 3D model EBV\_LMP1

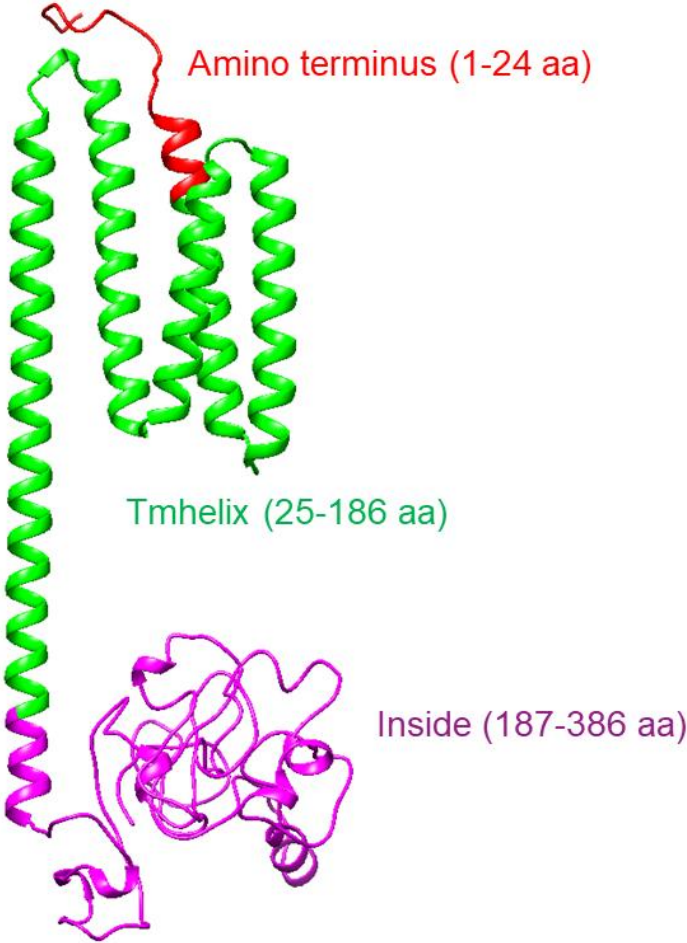

**Fig S5:** The Ramachandran plot of the refined **3D model EBV LMP1** structure.

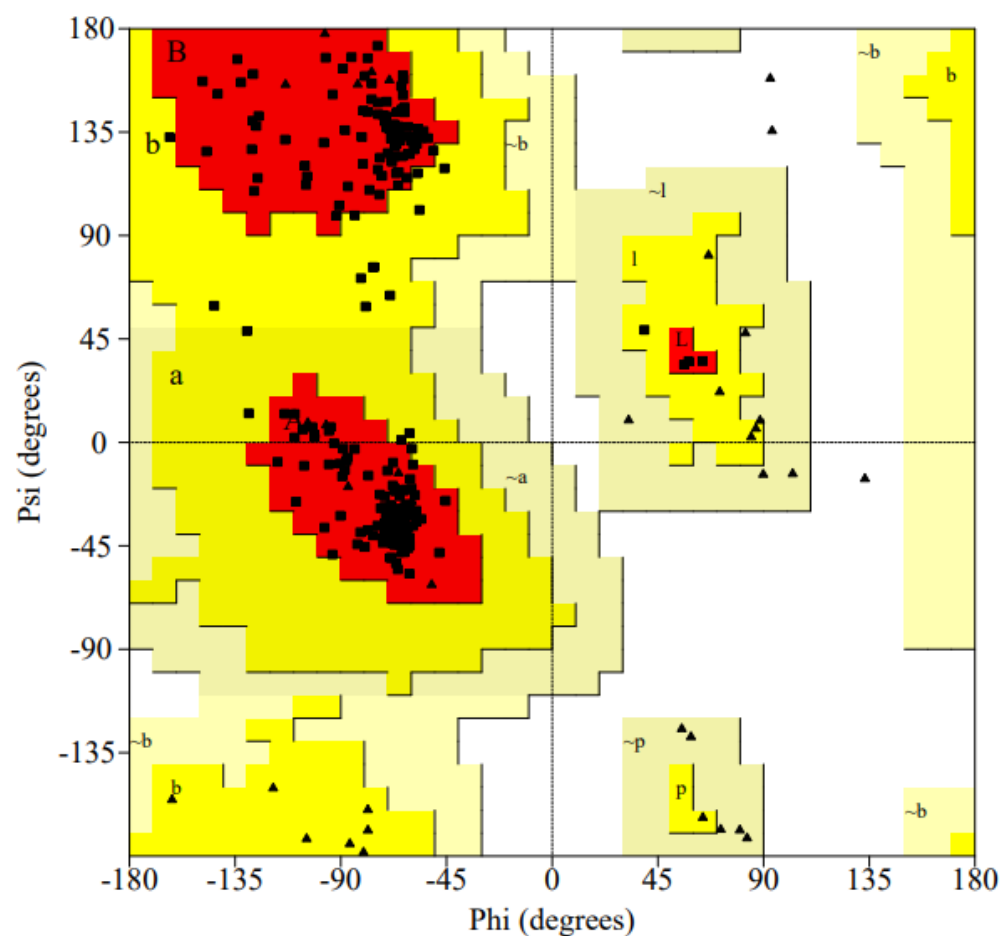

| Plot statistics                                      |     |        |
|------------------------------------------------------|-----|--------|
| Residues in most favoured regions [A,B,L]            | 290 | 96.0%  |
| Residues in additionally allowed regions [a,b,l,p]   | 12  | 4.0%   |
| Residues in generously allowed regions [~a,~b,~l,~p] | 0   | 0.0%   |
| Residues in disallowed regions                       | 0   | 0.0%   |
| -----                                                |     |        |
| Number of non-glycine and non-proline residues       | 302 | 100.0% |
| Number of end-residues (excl. Gly and Pro)           | 2   |        |
| Number of glycine residues (shown as triangles)      | 46  |        |
| Number of proline residues                           | 36  |        |
| -----                                                |     |        |
| Total number of residues                             | 386 |        |

**Fig S6:** The Ramachandran plot of the RaptorX 3D model EBV LMP1 structure.

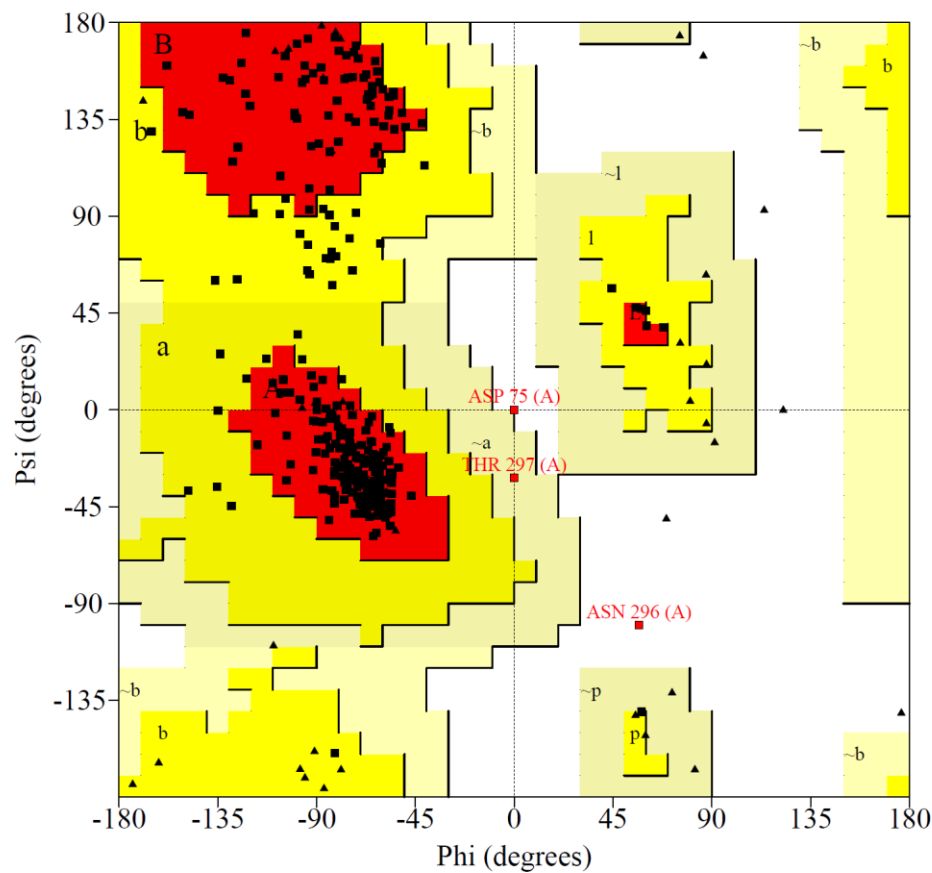

| Plot statistics                                      |     |        |
|------------------------------------------------------|-----|--------|
| Residues in most favoured regions [A,B,L]            | 265 | 87.7%  |
| Residues in additional allowed regions [a,b,l,p]     | 34  | 11.3%  |
| Residues in generously allowed regions [-a,-b,-l,-p] | 1   | 0.3%   |
| Residues in disallowed regions                       | 2   | 0.7%   |
| -----                                                |     |        |
| Number of non-glycine and non-proline residues       | 302 | 100.0% |
| Number of end-residues (excl. Gly and Pro)           | 2   |        |
| Number of glycine residues (shown as triangles)      | 46  |        |
| Number of proline residues                           | 36  |        |
| -----                                                |     |        |
| Total number of residues                             | 386 |        |

Based on an analysis of 118 structures of resolution of at least 2.0 Angstroms and R-factor no greater than 20%, a good quality model would be expected to have over 90% in the most favoured regions.

**Figure S7:** 2D representation of Spike-RBD interacting with *hACE2* (PDB: 6LZG). Interactions between Spike-RBD (Chain B) and *hACE2* (Chain B) provided by the LIGPLOT v.2.2 software. Olive Green lines represent hydrogen bonds, grey semi-circles denote hydrophobic interactions made by *hACE2* and Pink semi-circles represent hydrophobic hydrophobic interactions made by the Spike-RBD.

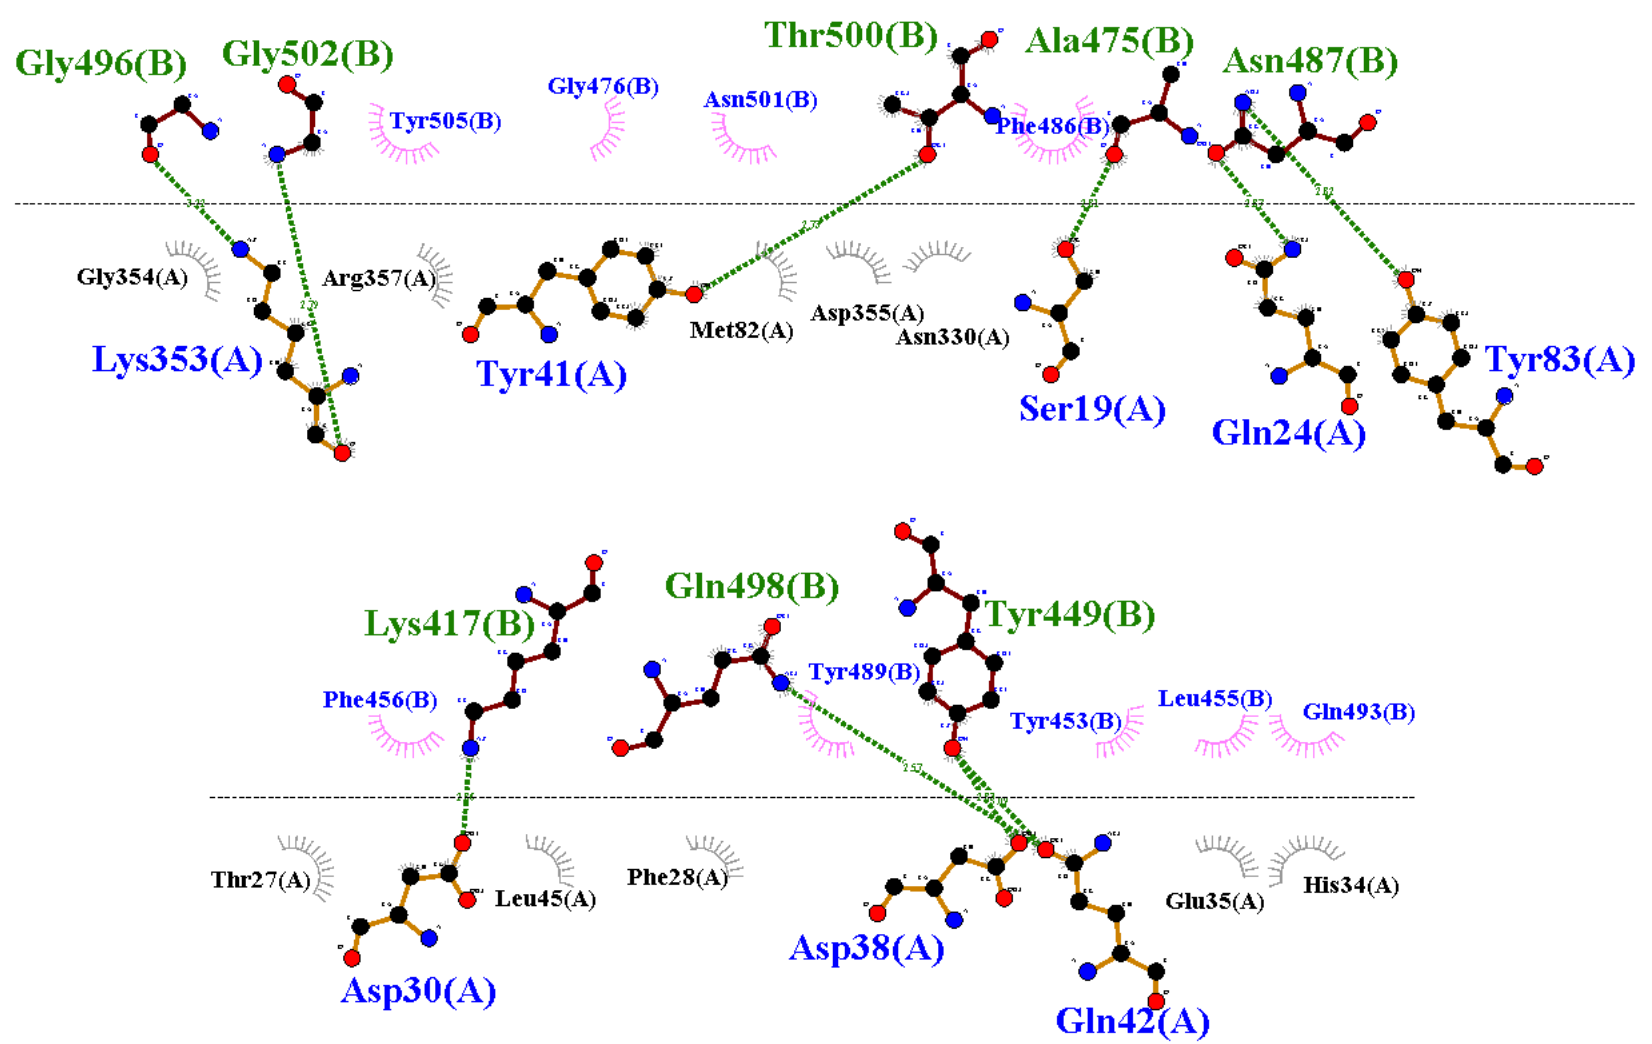

**Figure S8:** The four combined regions of Spike-RBD. The 3D structure of Spike-RBD(PDB: 6LZG ,Chain B) (Grey) and residues of four important regions R1- Lys417,Tyr449, Tyr453 (Red); R2-Gln498- Tyr502 (Blue); R3-Gln474, Ala475, Phe486, Asn487 (Black); R4-Gly 496, Gln 493 ( green)

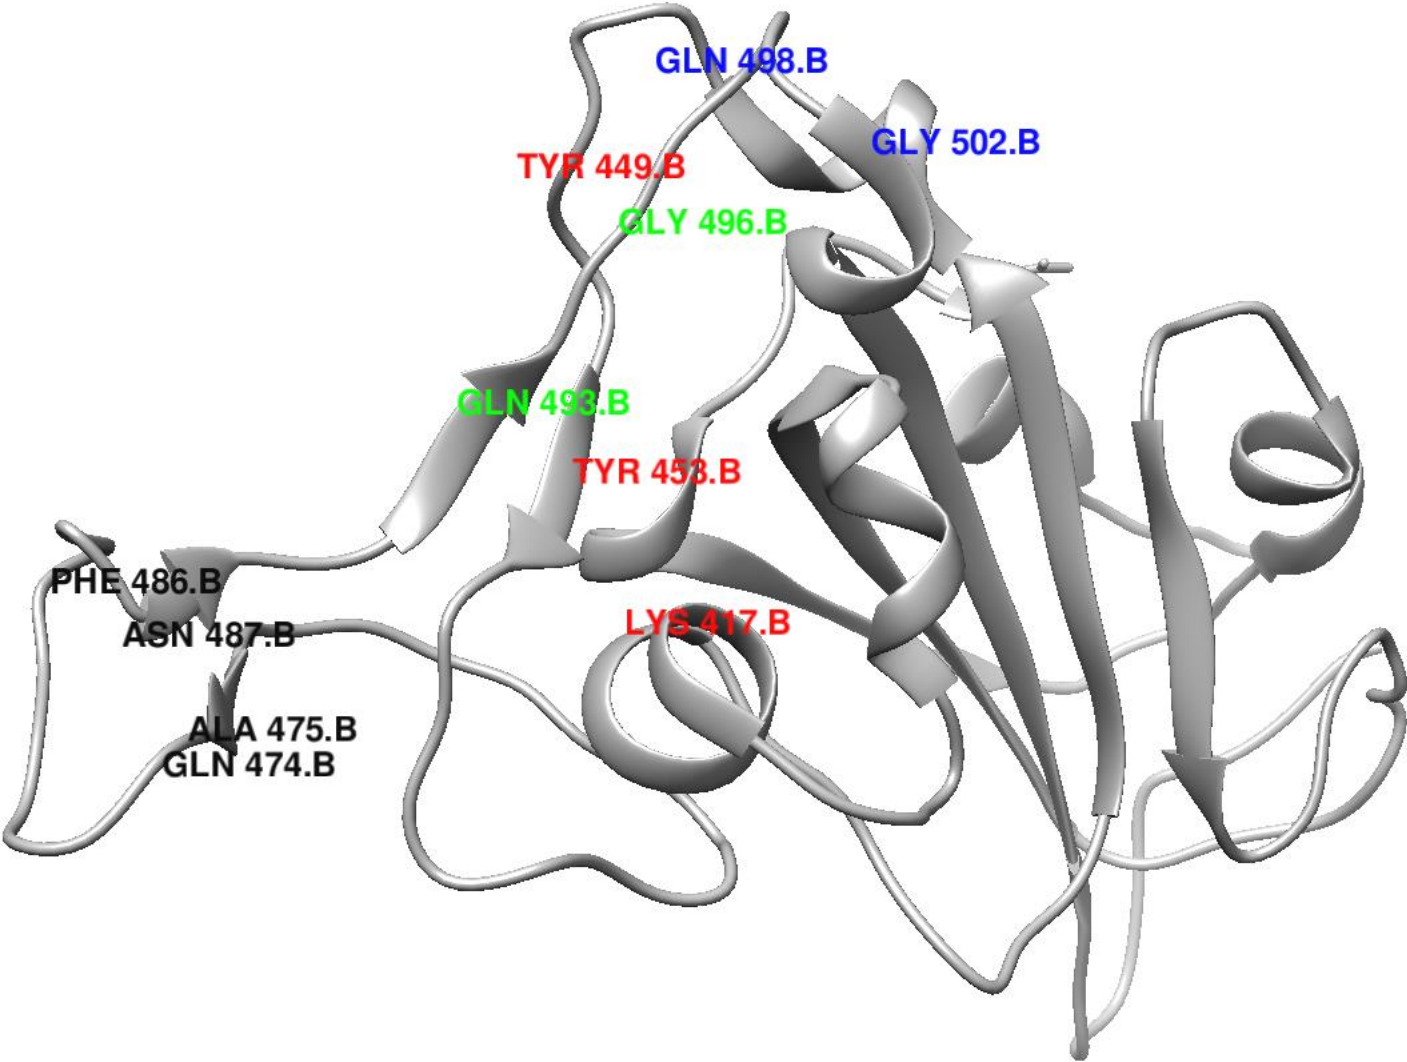



**Fig S9:** 2D representation of **CD15 (Chain A)** docking residues with Spike RBD (Chain B) Complex 3 , provided by the LIGPLOT v.2.2 software. Olive Green lines represent hydrogen bonds, grey semi-circles denote hydrophobic interactions made by CD15 and Pink semi-circles represent hydrophobic hydrophobic interactions made by the Spike-RBD.

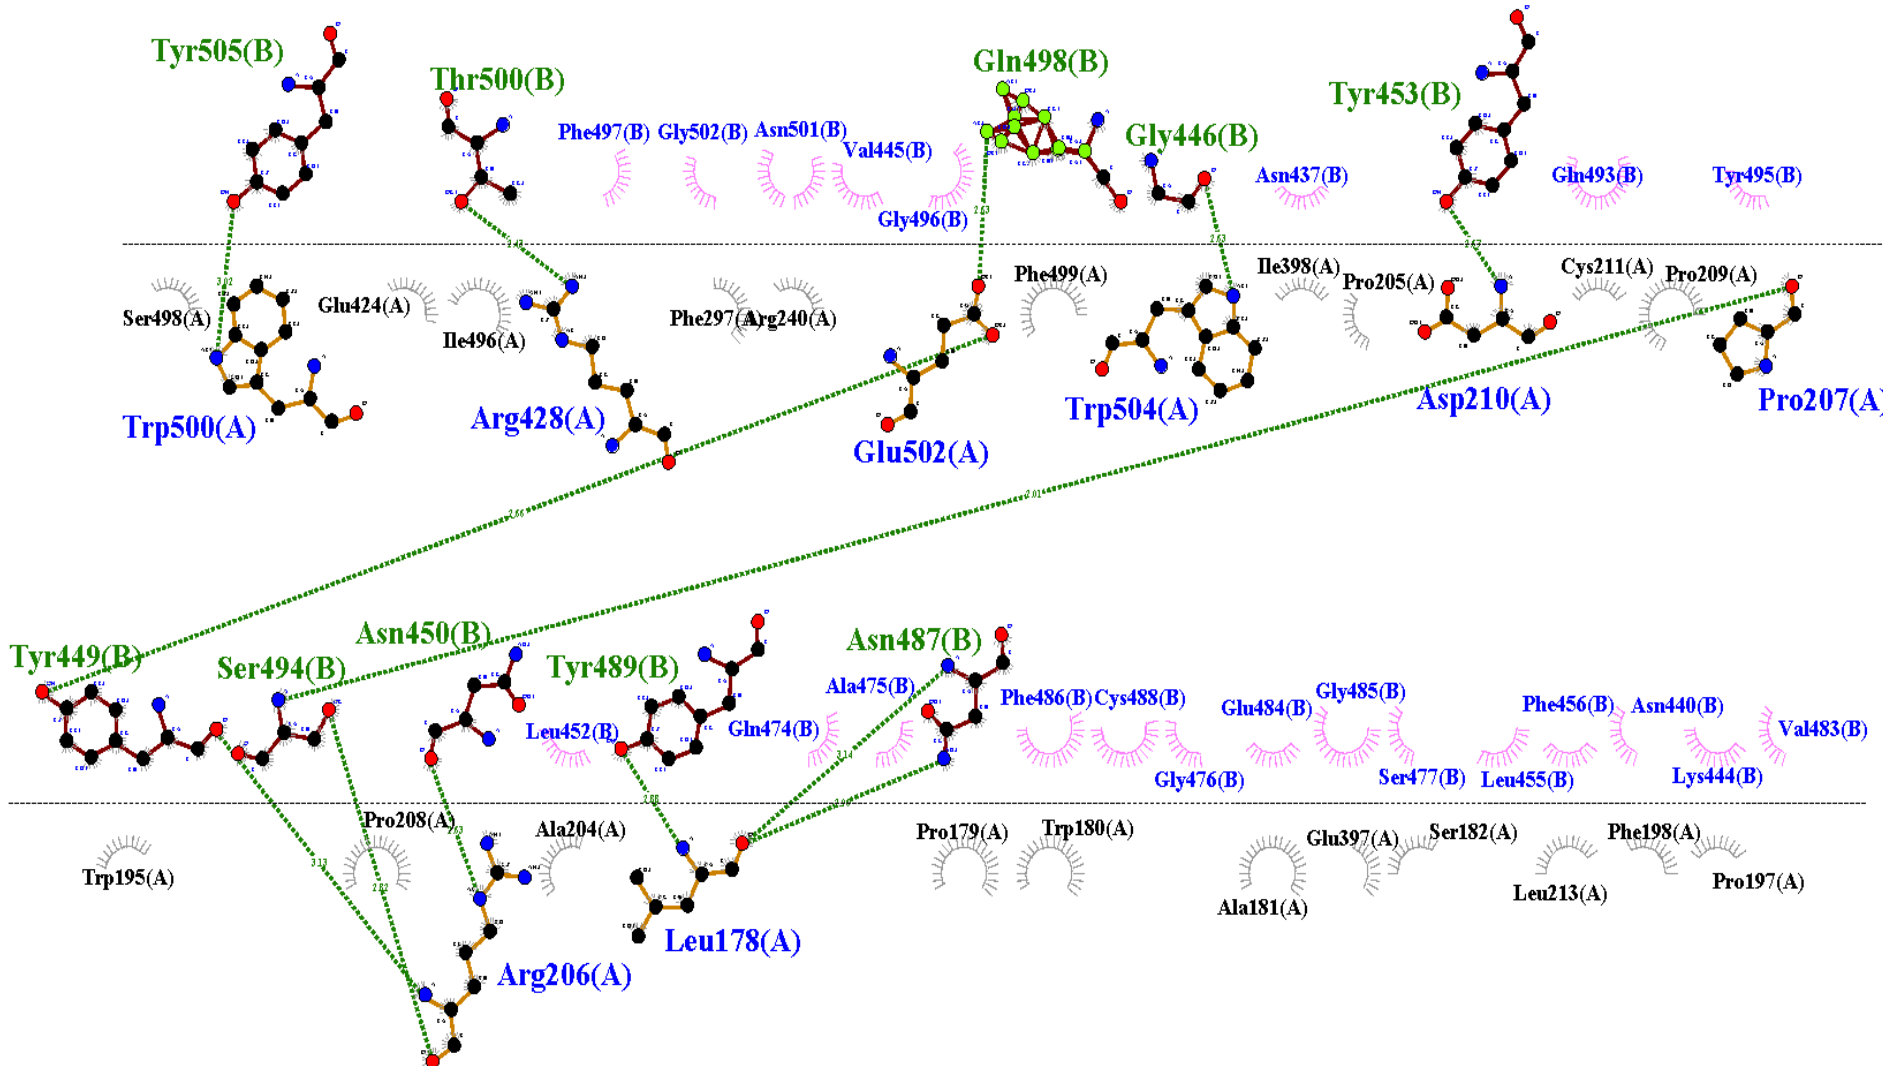

**complex3**

**Fig S10** 2D representation of **CD15 (Chain A)** docking residues with Spike RBD (Chain B), Complex 4 provided by the LIGPLOT v.2.2 software. Olive Green lines represent hydrogen bonds, gray semi-circles denote hydrophobic interactions made by CD15 and Pink semi-circles represent hydrophobic interactions made by the Spike-RBD.

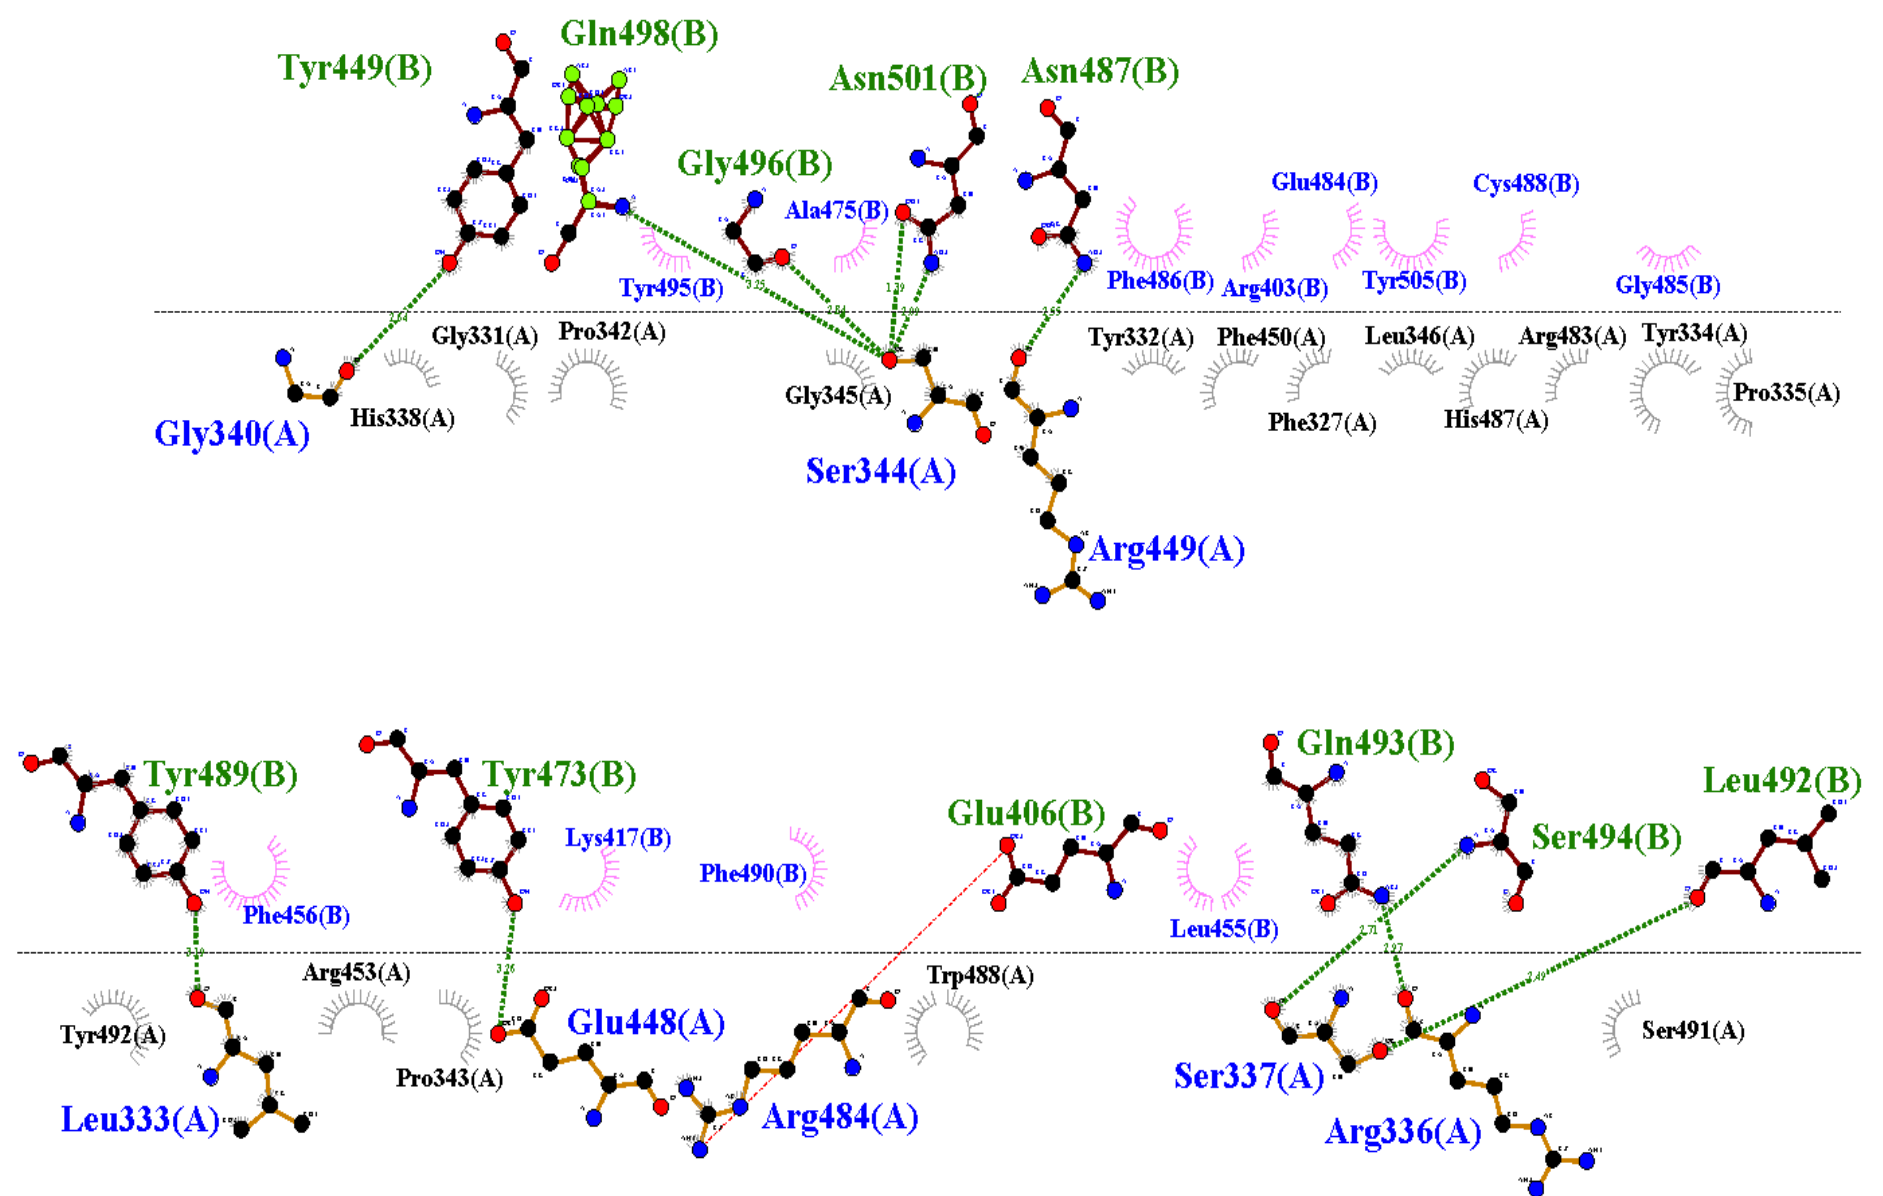

**Fig S11** 2D representation of **CD15 (Chain A)** docking residues with Spike RBD (Chain B), Complex 6 provided by the LIGPLOT v.2.2 software. Olive Green lines represent hydrogen bonds, grey semi-circles denote hydrophobic interactions made by CD15 and Pink semi-circles represent hydrophobic hydrophobic interactions made by the Spike-RBD.

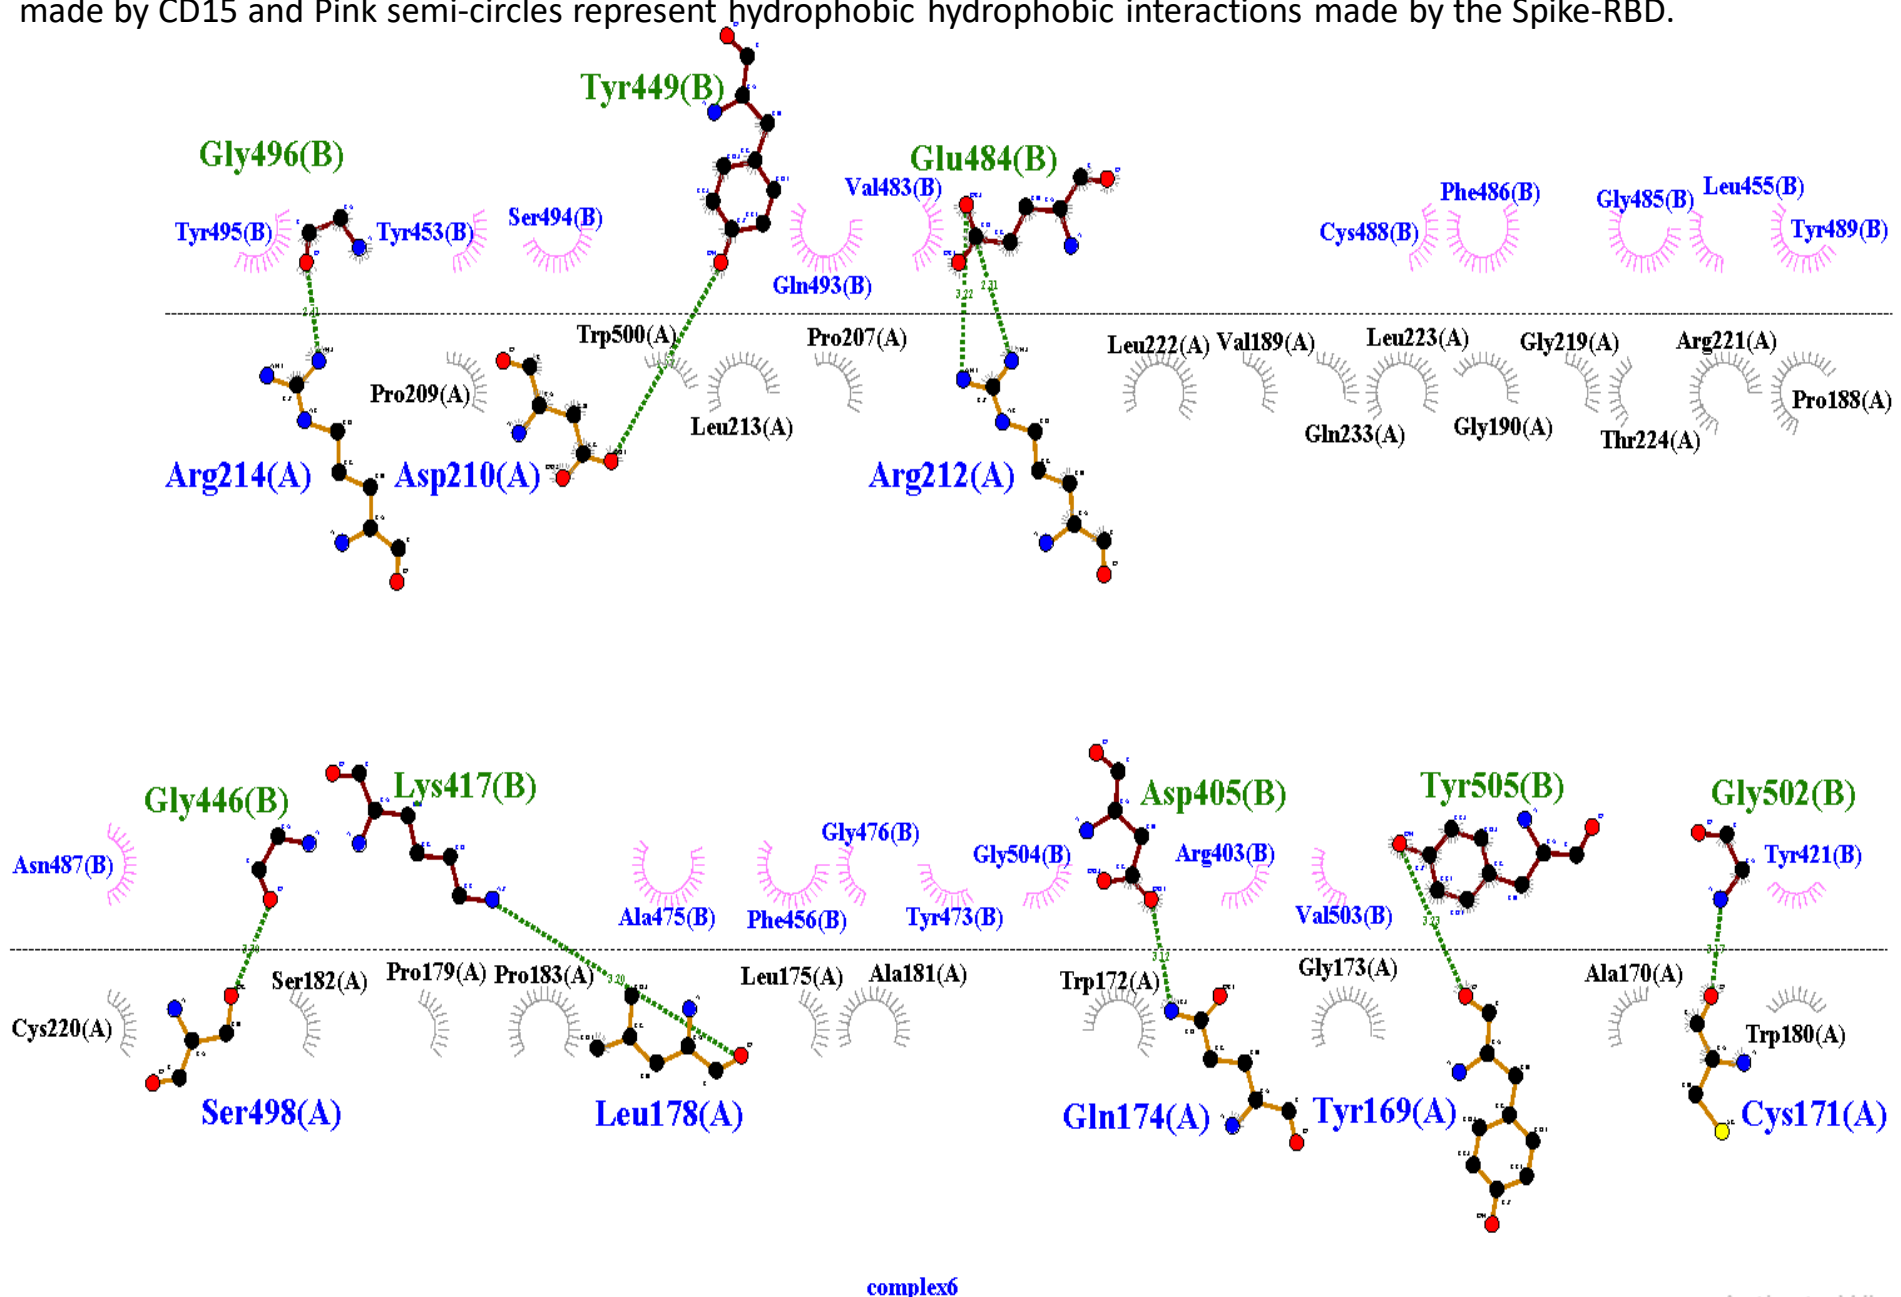

**Fig S12** 2D representation of **CD27/ TNFRSF7** (Chain A) docking residues with Spike RBD (Chain B), Complex 8, provided by the LIGPLOT v.2.2 software. Olive Green lines represent hydrogen bonds, grey semi-circles denote hydrophobic interactions made by **CD27/ TNFRSF7** and Pink semi-circles represent hydrophobic interactions made by the Spike-RBD.

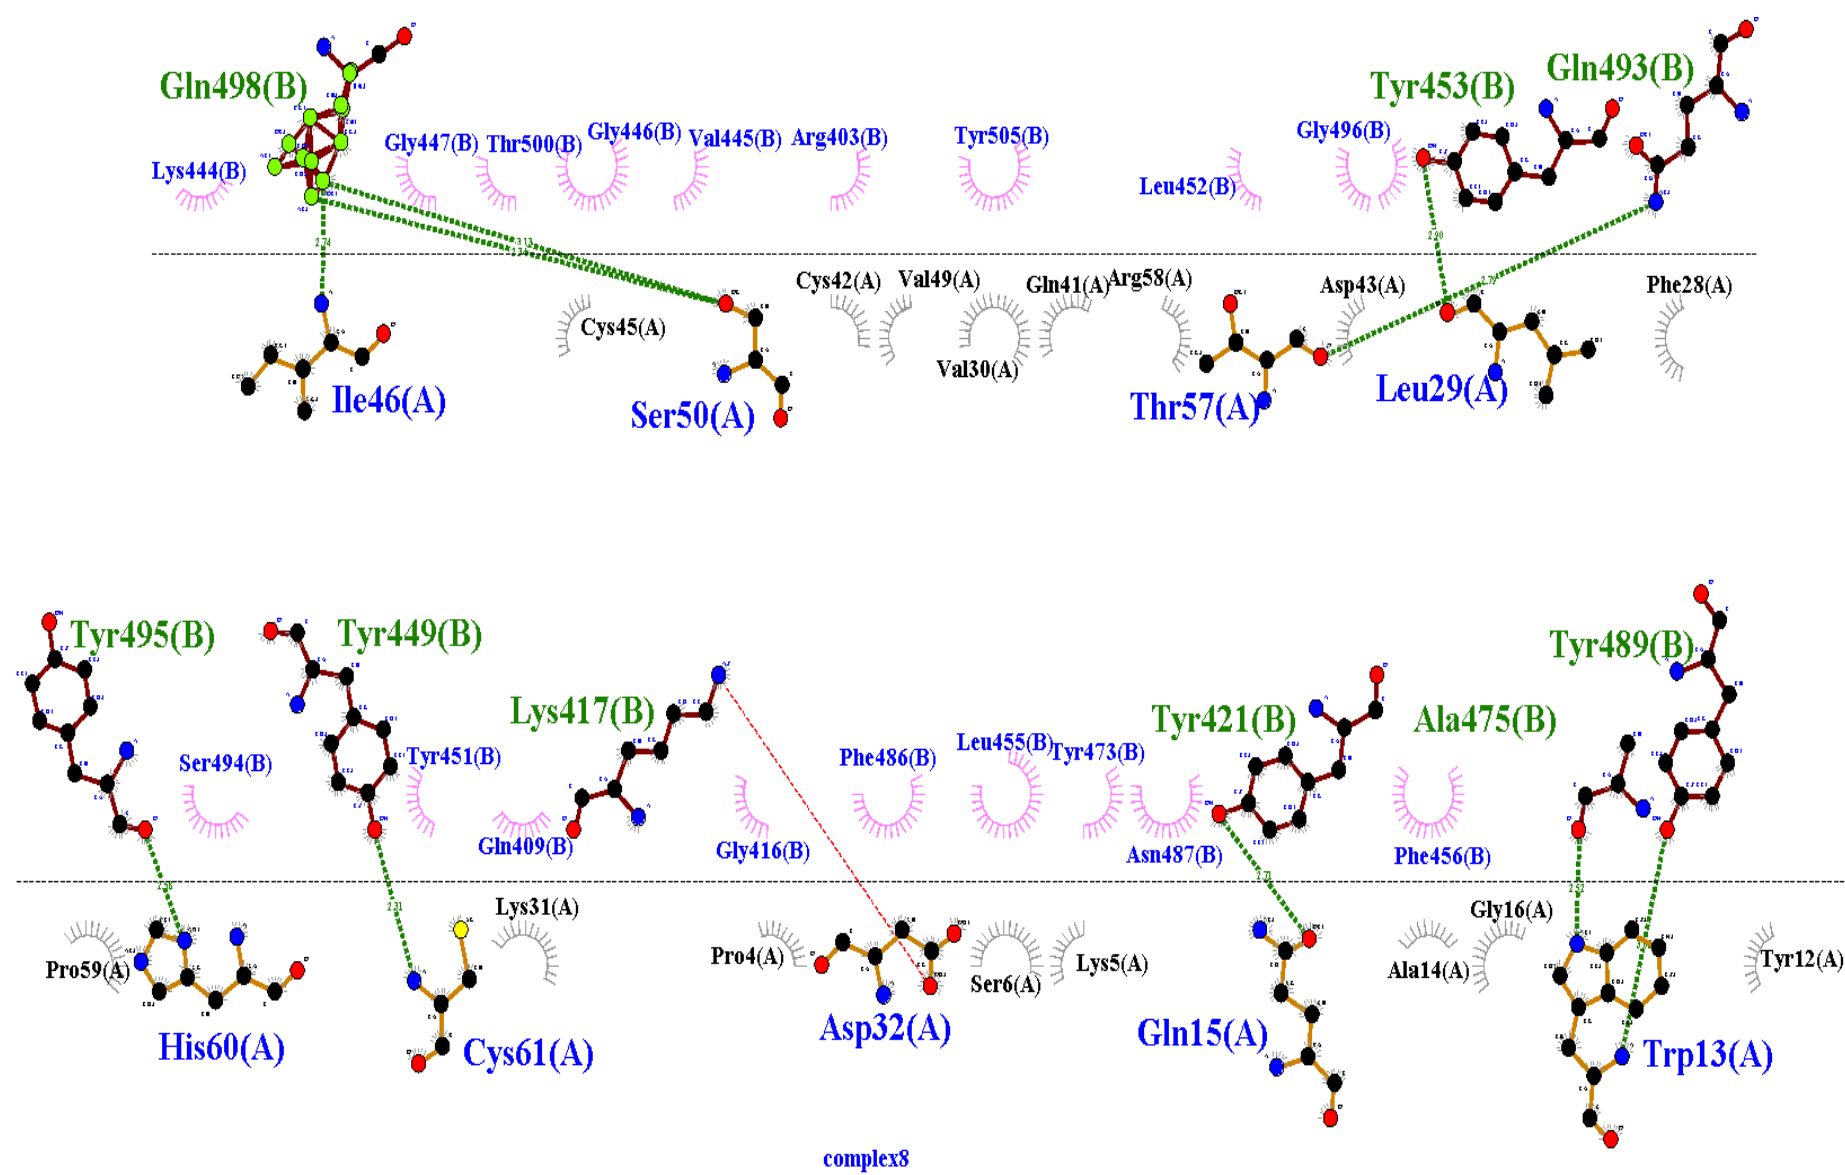

**Fig S13:** 2D representation of **CD27/ TNFRSF7** (Chain A) docking residues with Spike RBD (Chain B), Complex 9, provided by the LIGPLOT v.2.2 software. Olive Green lines represent hydrogen bonds, grey semi-circles denote hydrophobic interactions made by **CD27/ TNFRSF7** and Pink semi-circles represent hydrophobic interactions made by the Spike-RBD.

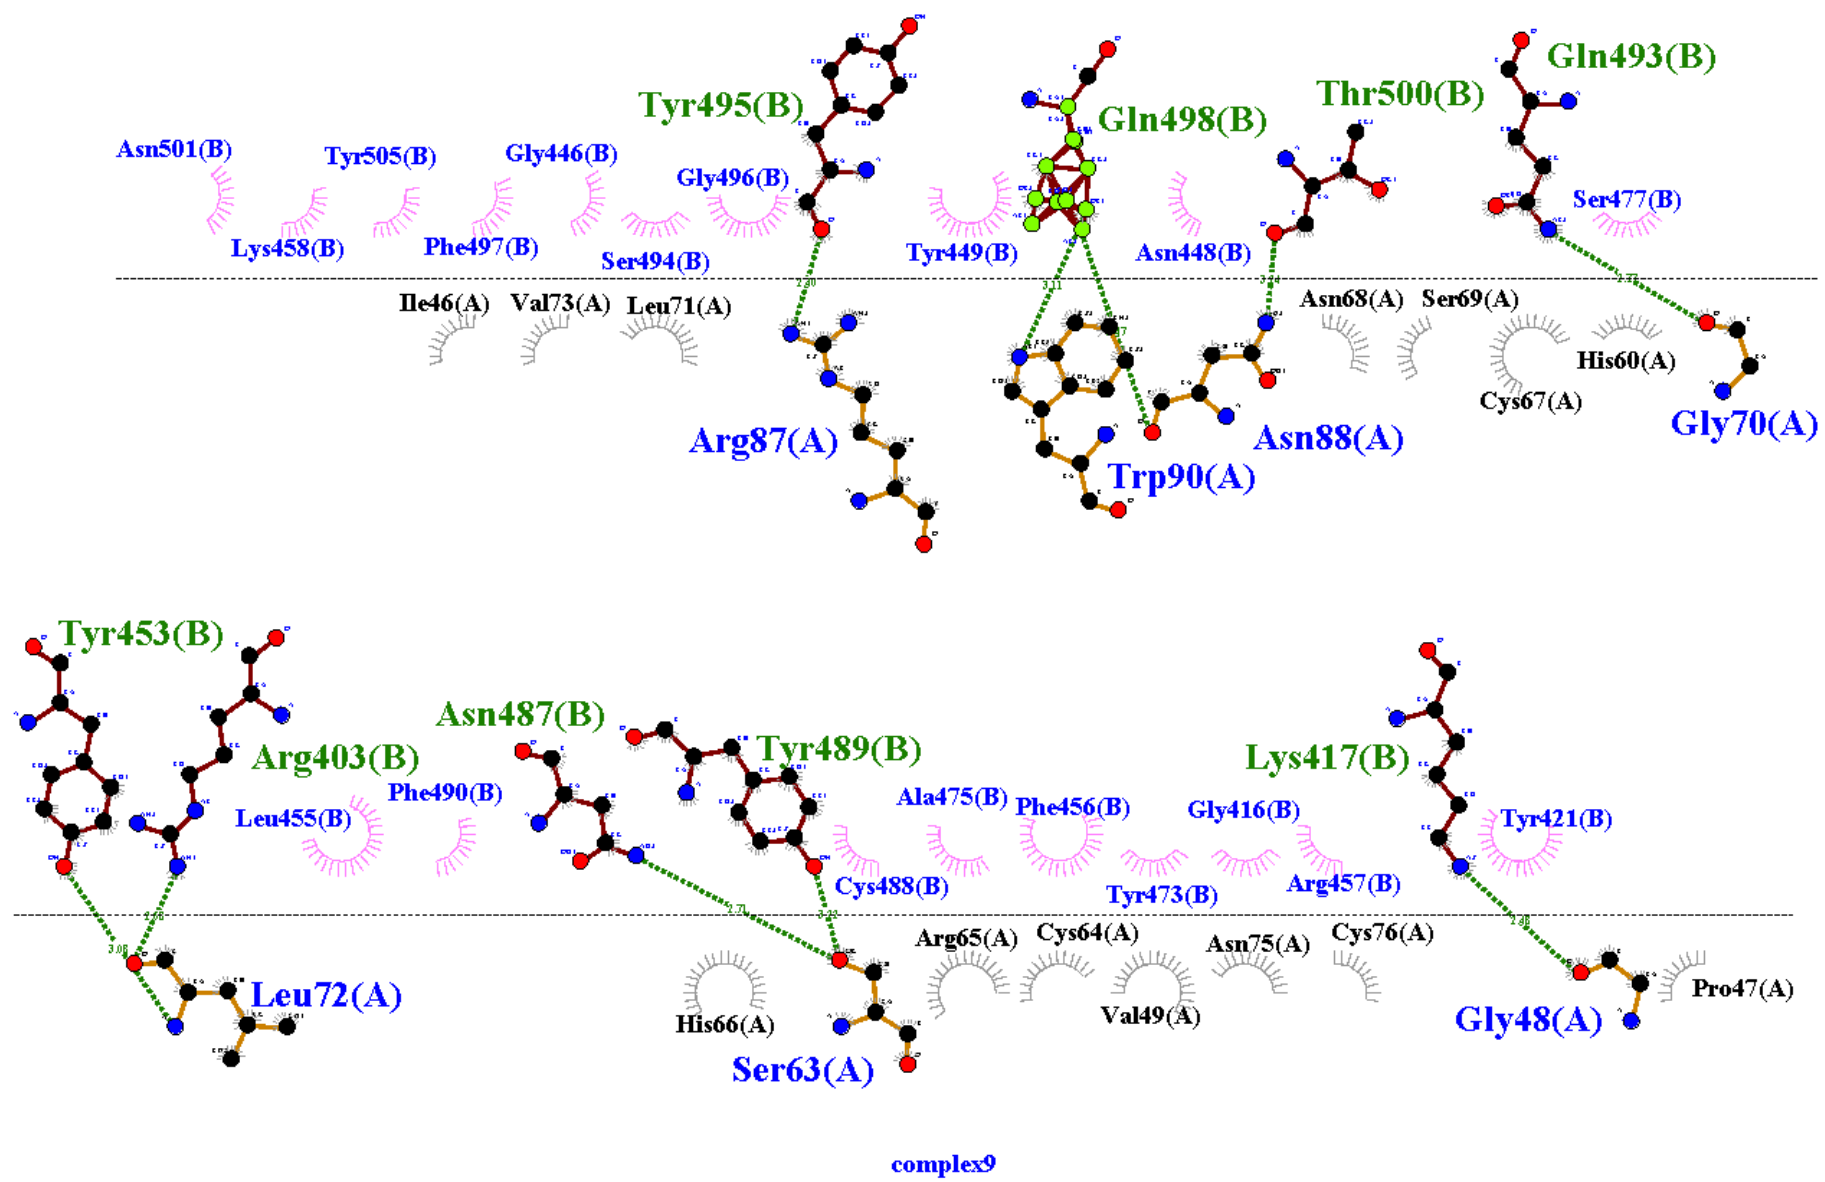

**Fig S14:** 2D representation of **CD30** (Chain A) docking residues with Spike RBD (Chain B), Complex 5, provided by the LIGPLOT v.2.2 software. Olive Green lines represent hydrogen bonds, grey semi-circles denote hydrophobic interactions made by **CD30** and Pink semi-circles represent hydrophobic interactions made by the Spike-RBD.

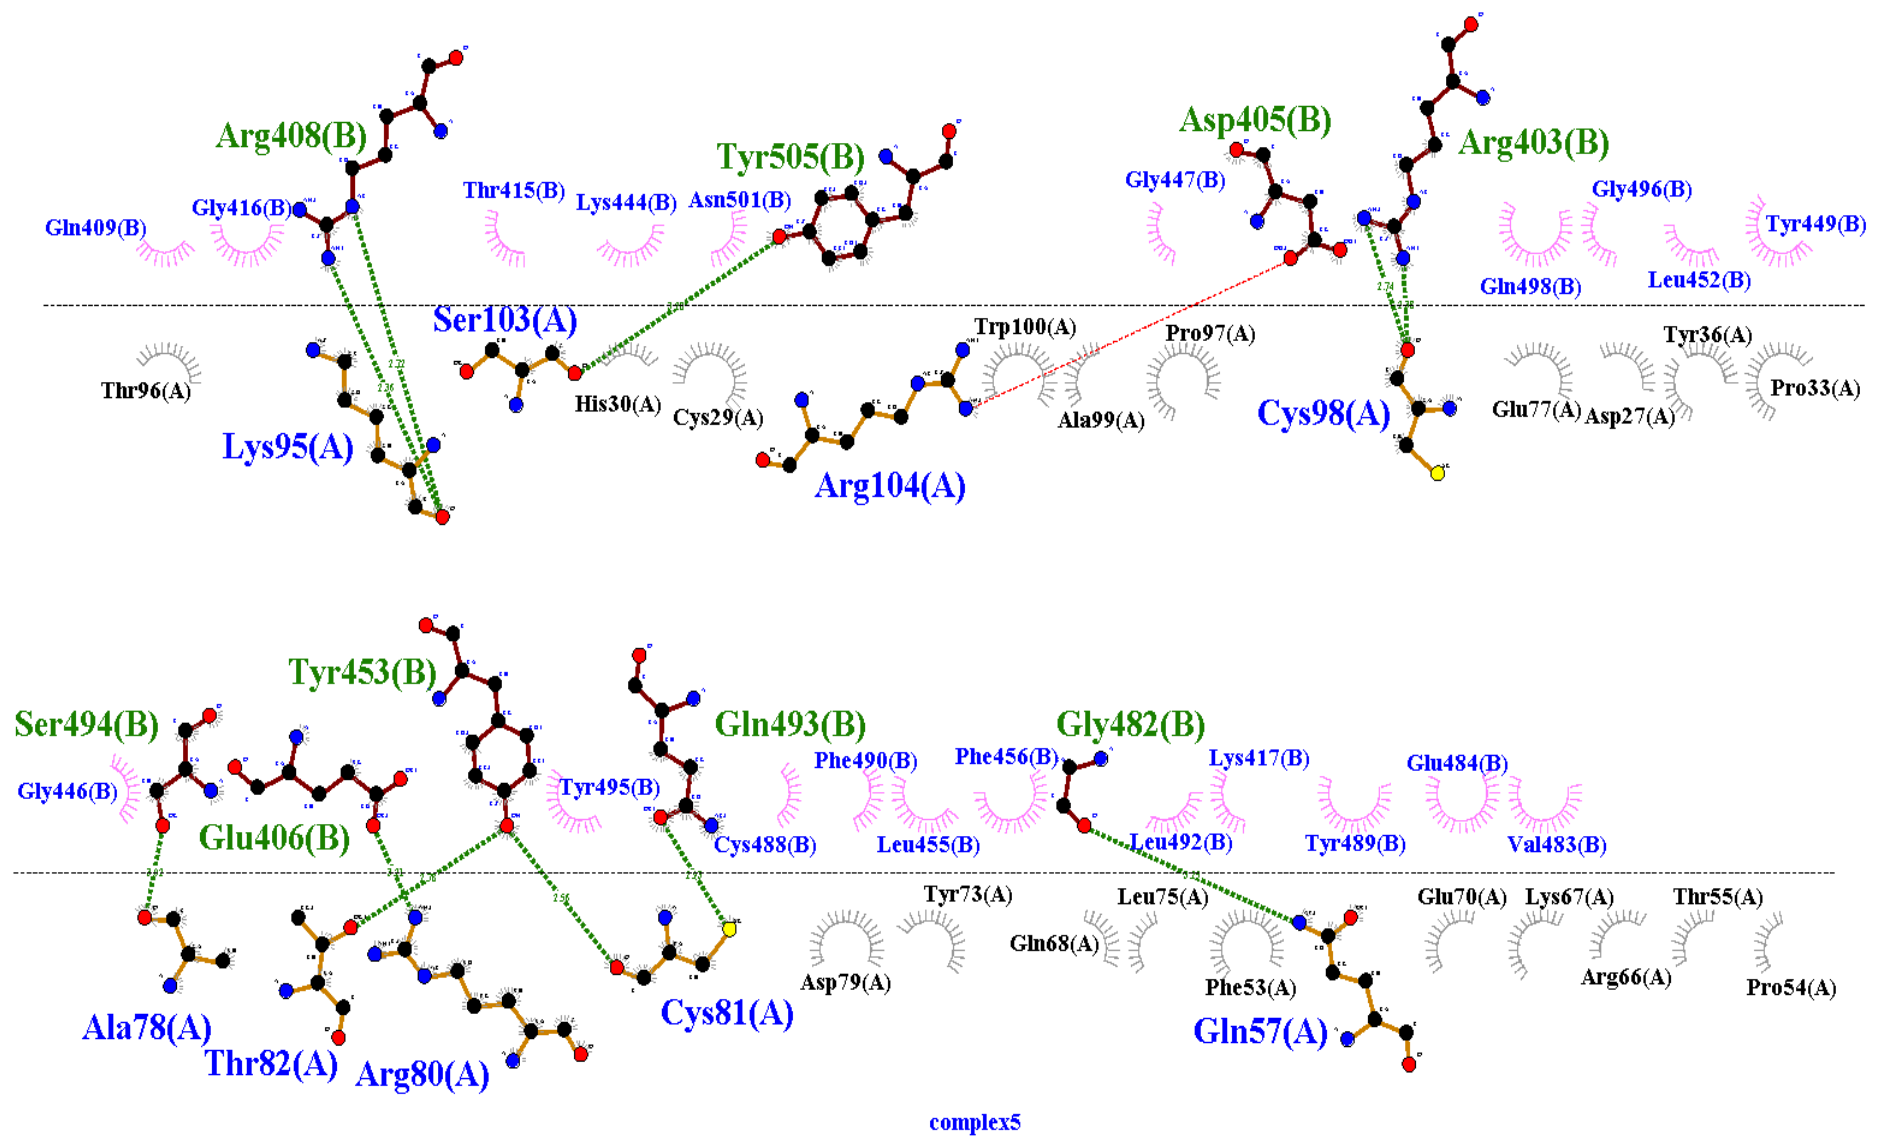

**Fig S15:** 2D representation of **CD30** (Chain A) docking residues with Spike RBD (Chain B), Complex 3, provided by the LIGPLOT v.2.2 software. Olive Green lines represent hydrogen bonds, grey semi-circles denote hydrophobic interactions made by **CD30** and Pink semi-circles represent hydrophobic interactions made by the Spike-RBD.

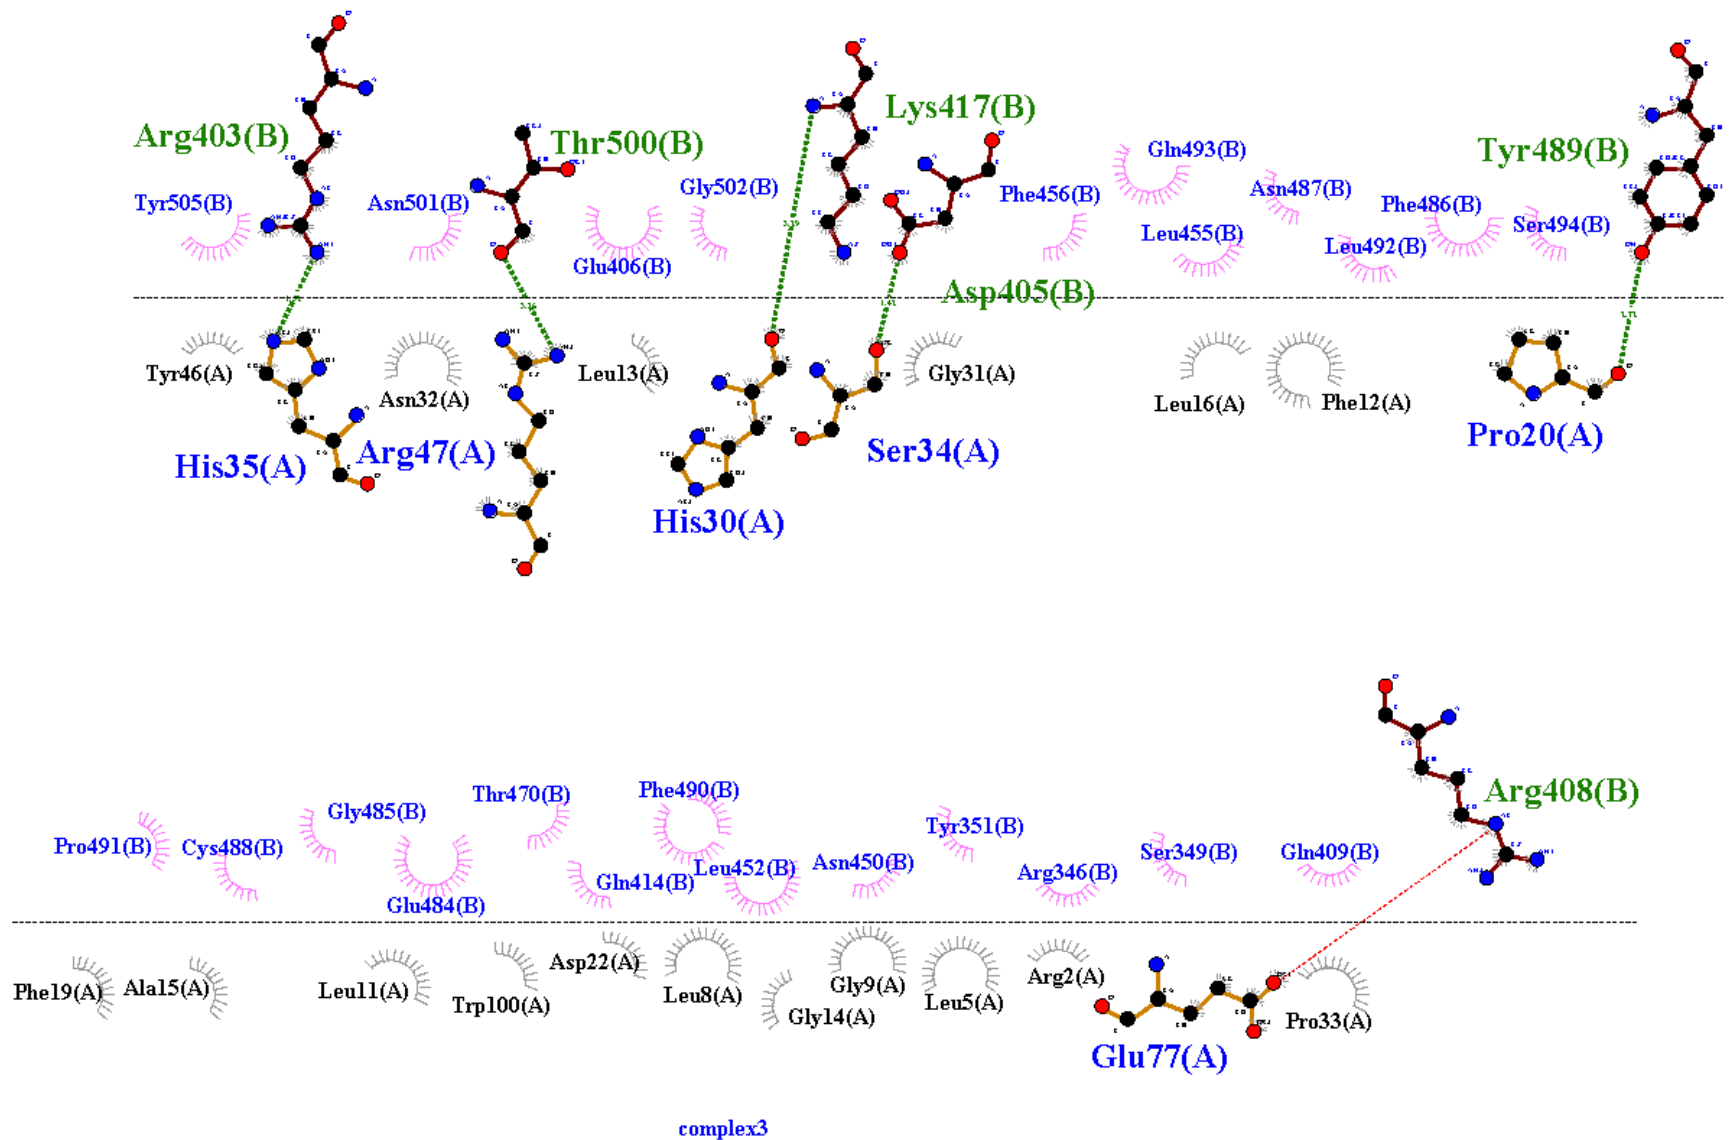

**Fig S16:** 2D representation of **CD40** (Chain A) docking residues with Spike RBD (Chain B), Complex 8, provided by the LIGPLOT v.2.2 software. Olive Green lines represent hydrogen bonds, grey semi-circles denote hydrophobic interactions made by **CD40** and Pink semi-circles represent hydrophobic interactions made by the Spike-RBD.

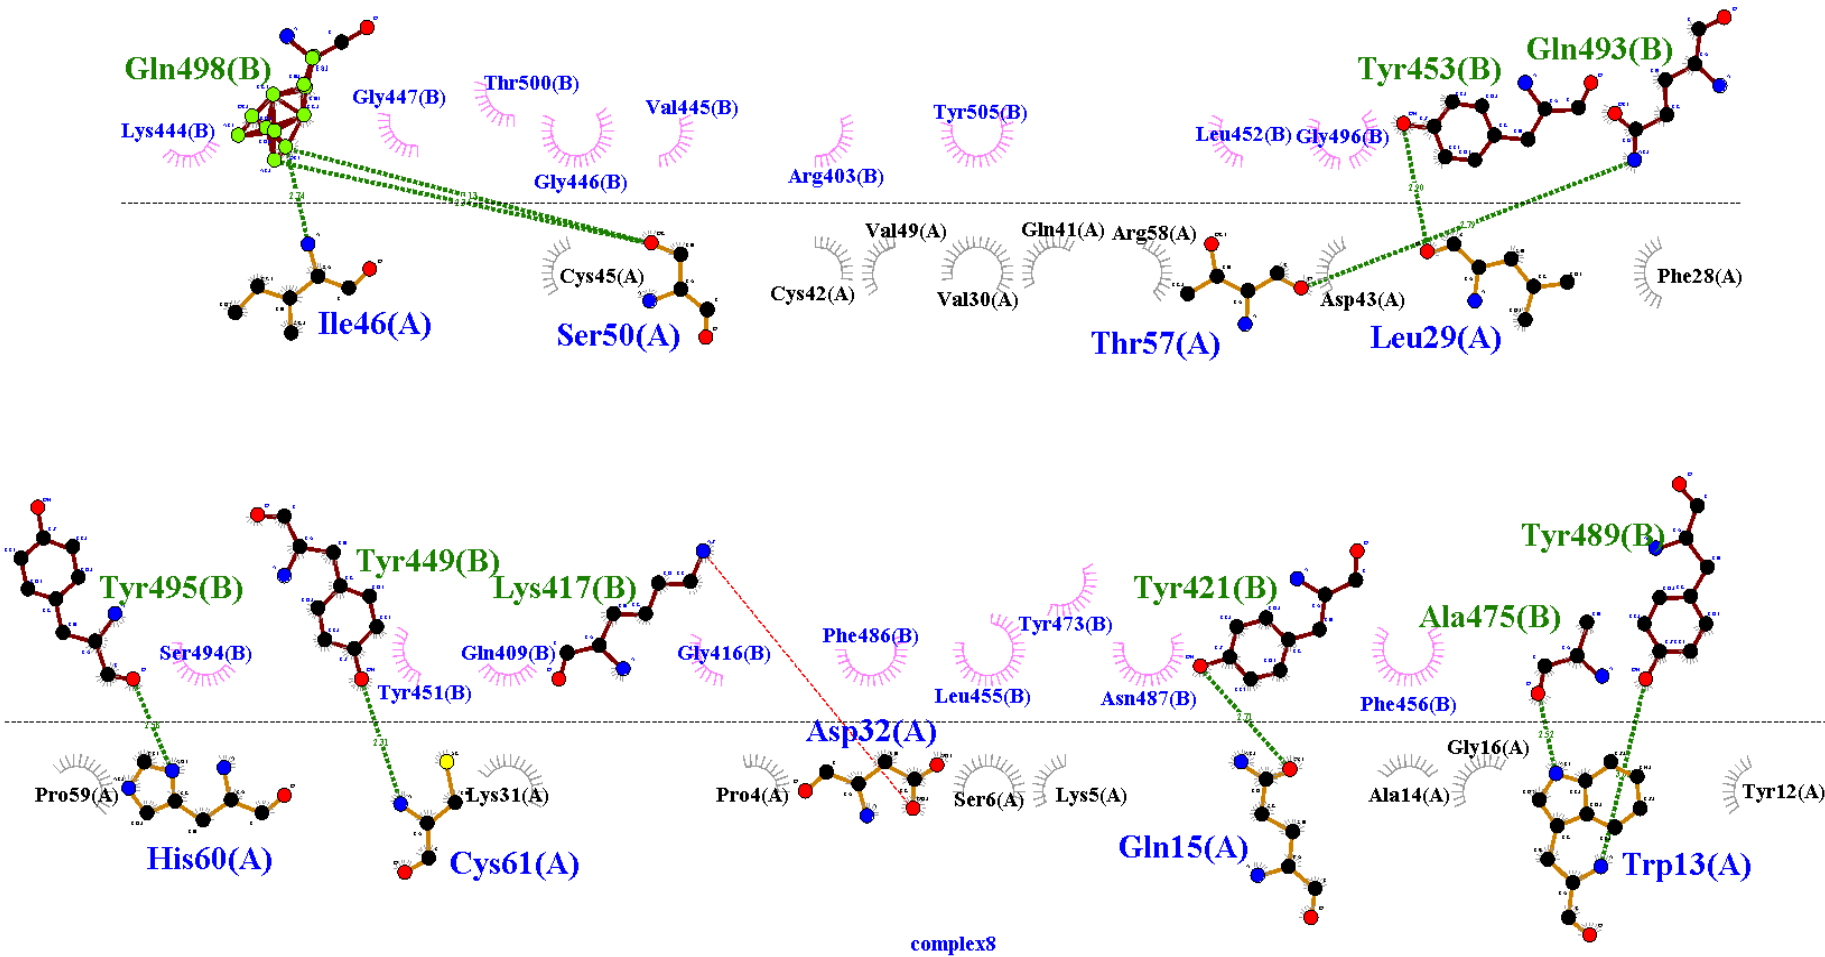



**Fig S17:** 2D representation of **CD40** (Chain A) docking residues with Spike RBD (Chain B), Complex 9, provided by the LIGPLOT v.2.2 software. Olive Green lines represent hydrogen bonds, grey semi-circles denote hydrophobic interactions made by **CD40** and Pink semi-circles represent hydrophobic interactions made by the Spike-RBD.

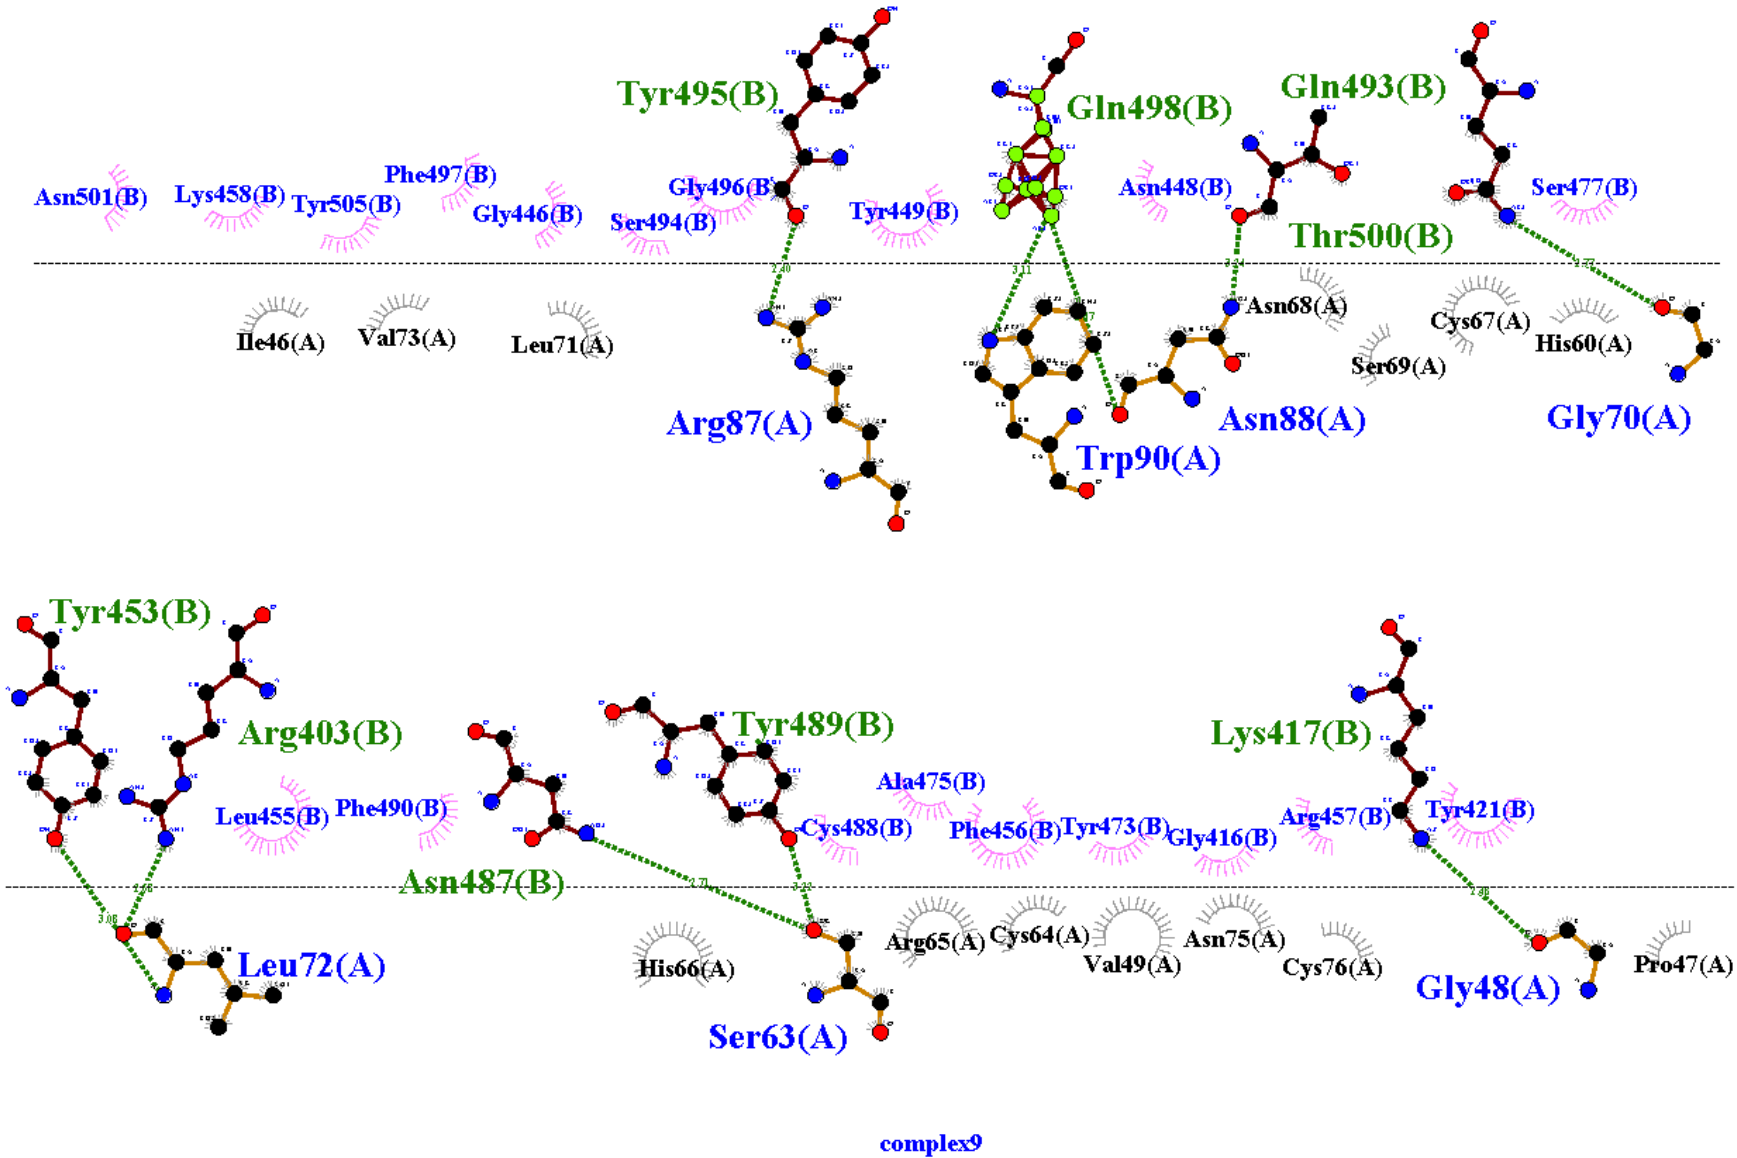

**Fig S18:** 2D representation of **CD40** (Chain A) docking residues with Spike RBD (Chain B), Complex 3, provided by the LIGPLOT v.2.2 software. Olive Green lines represent hydrogen bonds, grey semi-circles denote hydrophobic interactions made by **CD40** and Pink semi-circles represent hydrophobic interactions made by the Spike-RBD.

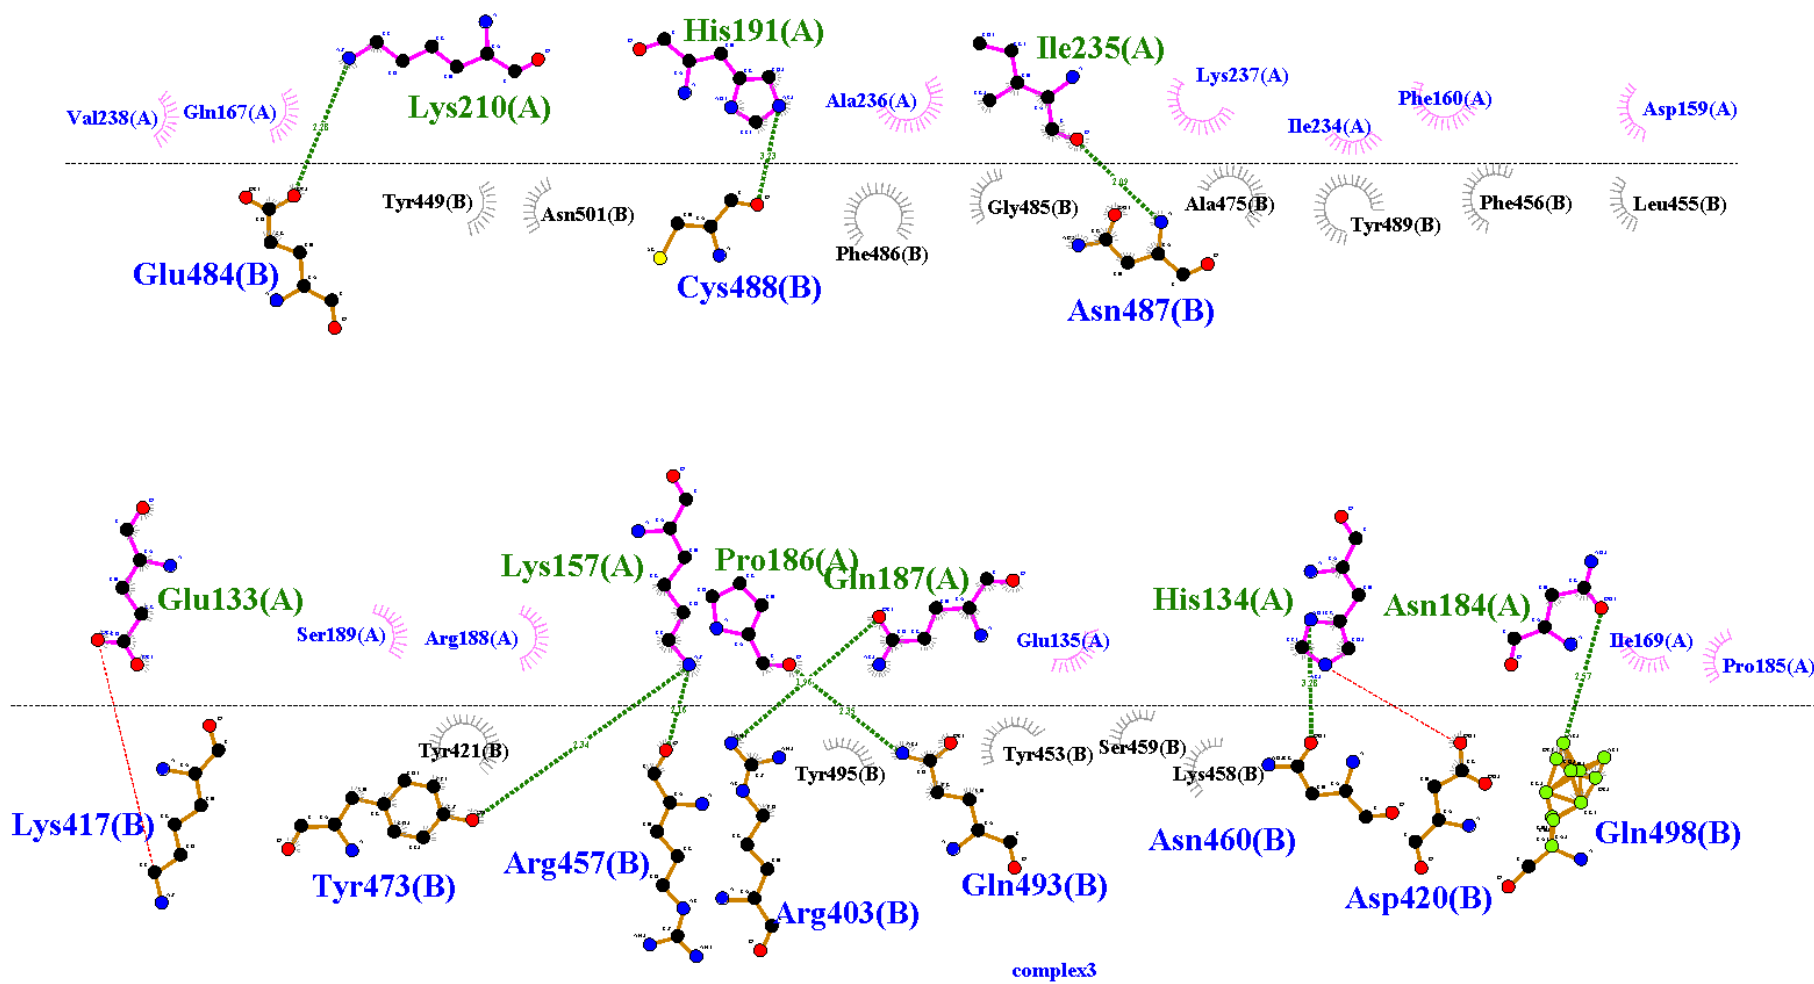

**Fig S19:** 2D representation of **CD45** (Chain A) docking residues with Spike RBD (Chain B), Complex 8, provided by the LIGPLOT v.2.2 software. Olive Green lines represent hydrogen bonds, grey semi-circles denote hydrophobic interactions made by Spike-RBD and Pink semi-circles represent hydrophobic interactions made by the CD45.

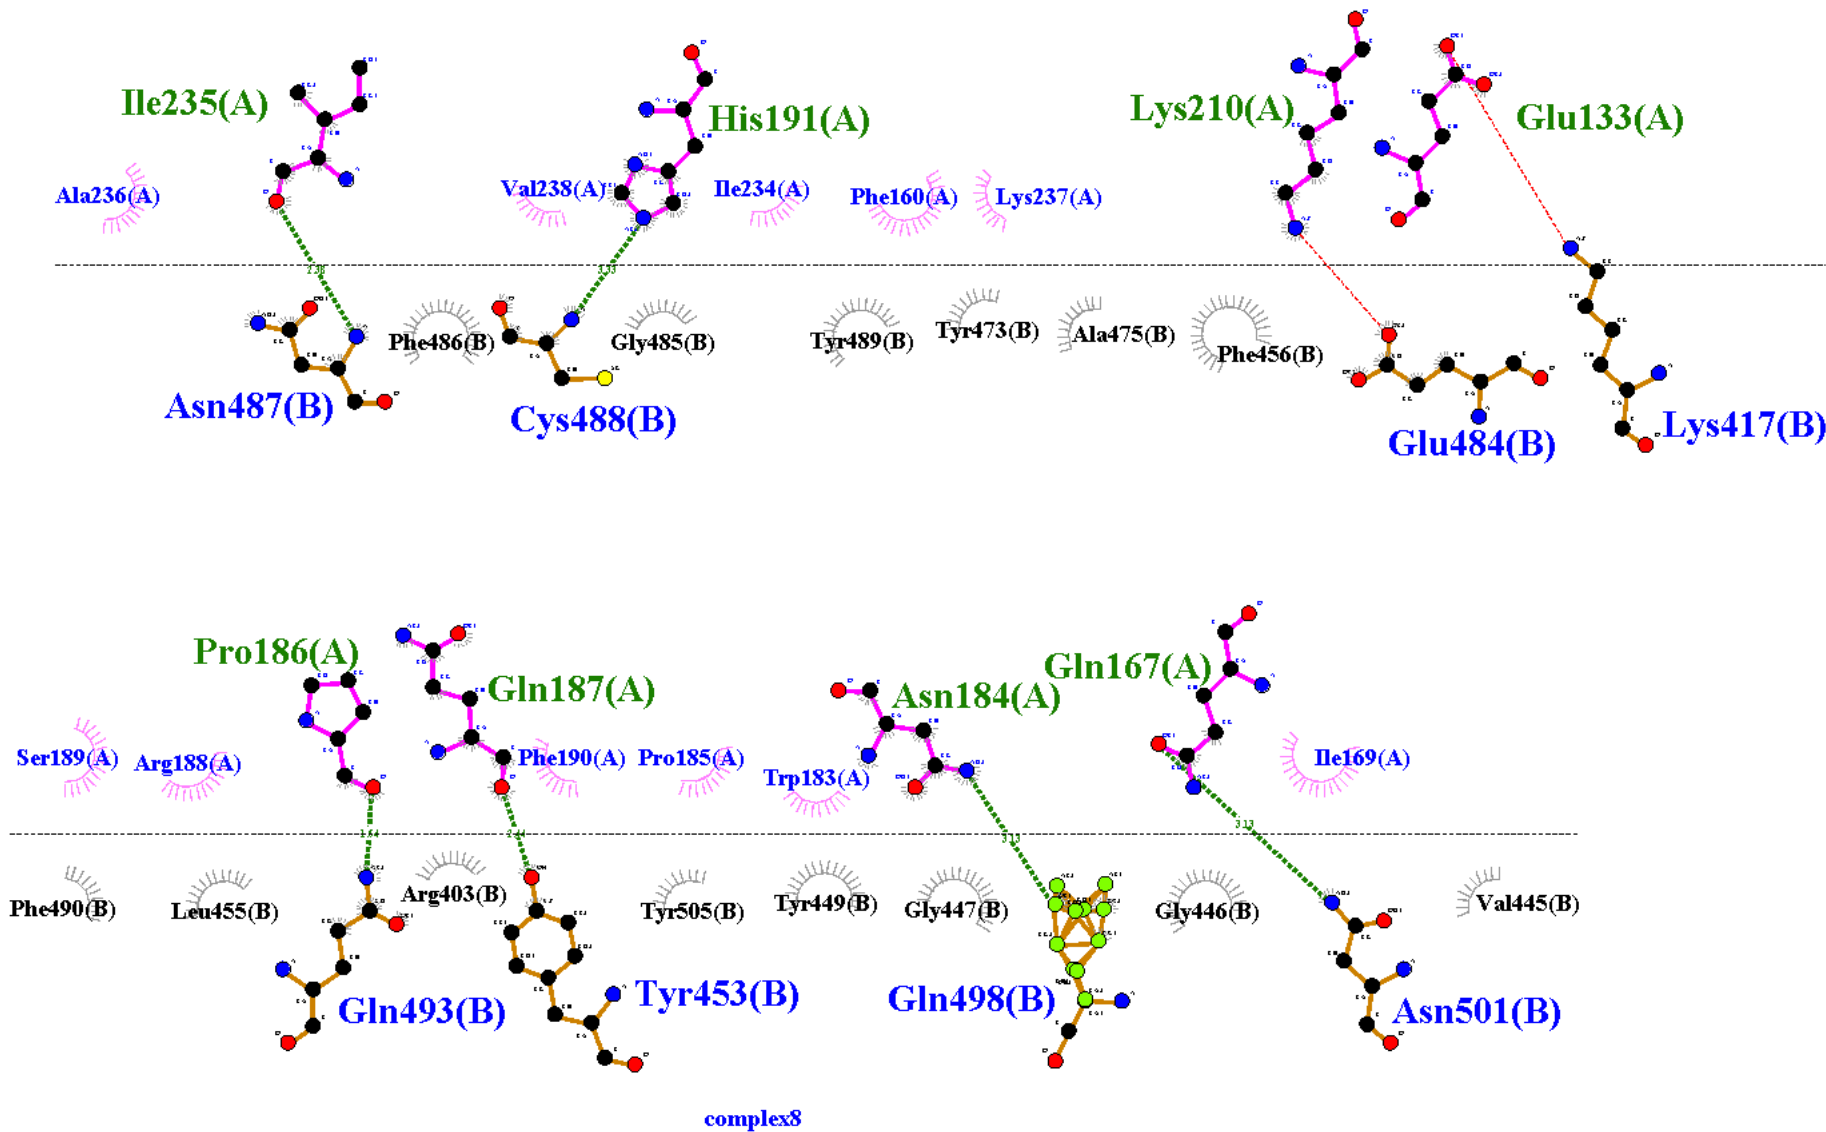



**Fig S21:** 2D representation of **CD80 (Chain A)** docking residues with Spike RBD (Chain B) Complex 9, provided by the LIGPLOT v.2.2 software. Olive Green lines represent hydrogen bonds, grey semi-circles denote hydrophobic interactions made by CD80 and Pink semi-circles represent hydrophobic interactions made by the Spike RBD

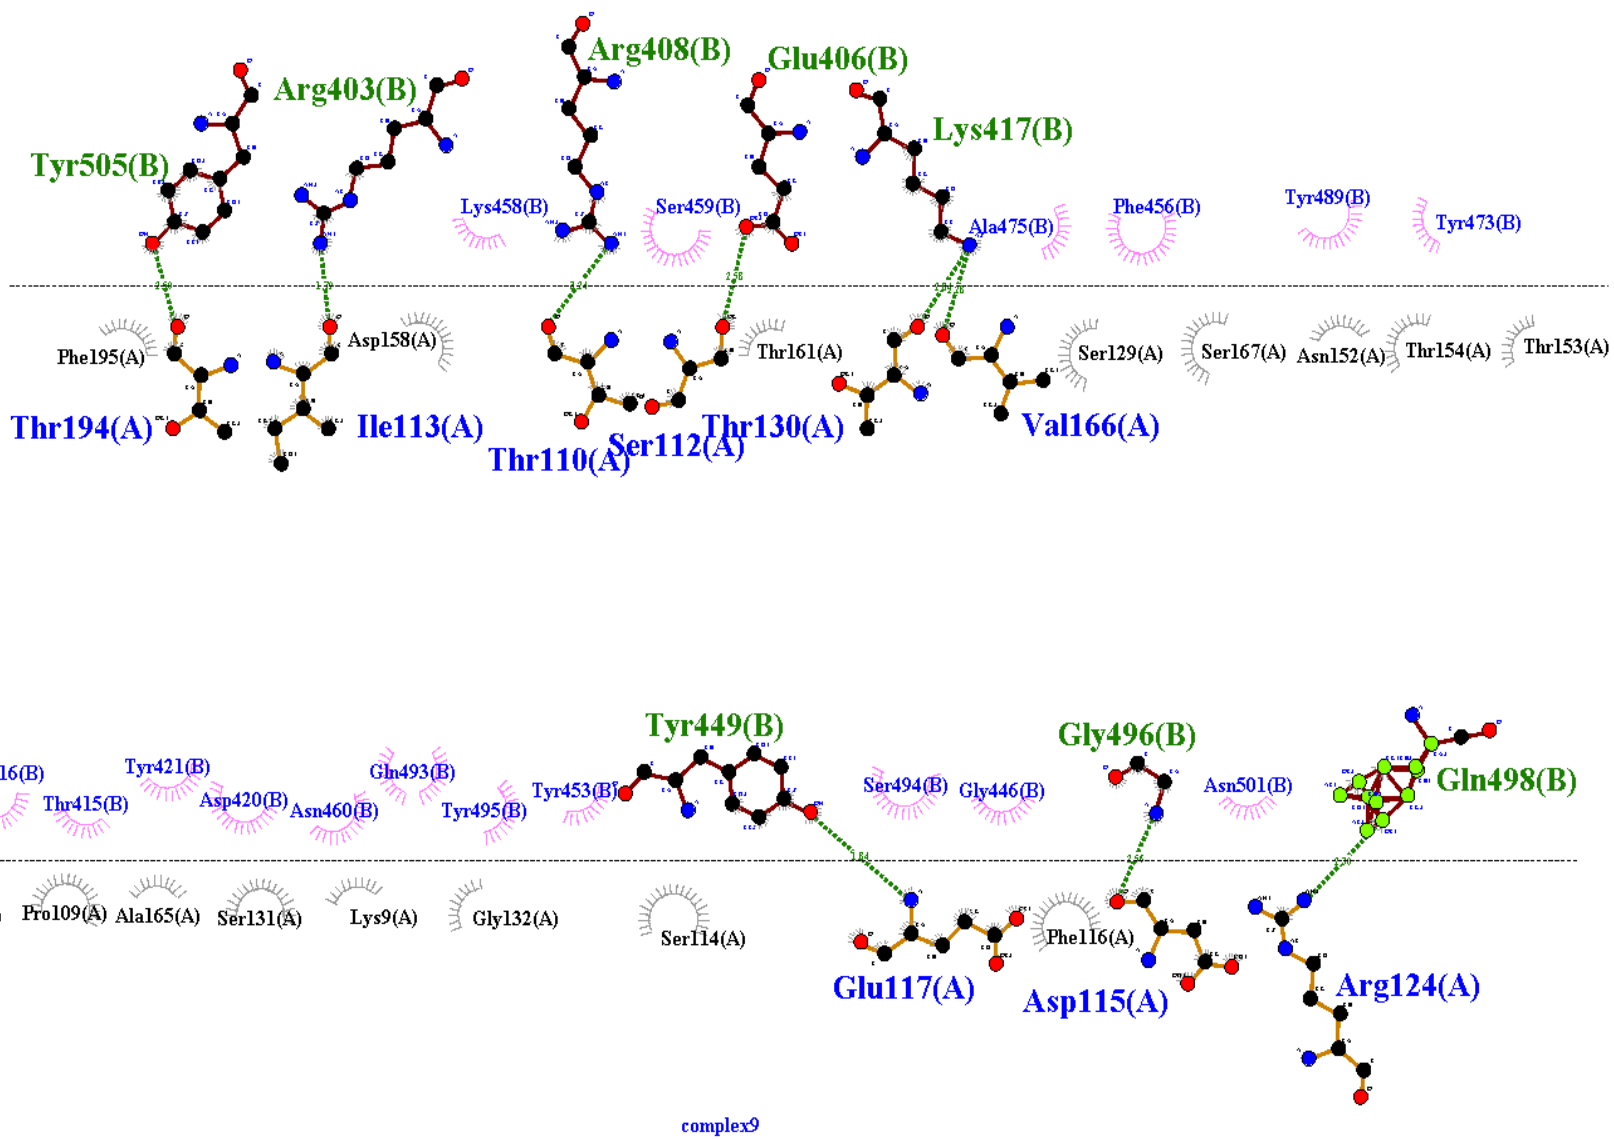

complex9

**Fig S22:** 2D representation of **CD86** ( Chain A) docking residues with Spike RBD Chain B)Complex 2, provided by the LIGPLOT v.2.2 software. Olive Green lines represent hydrogen bonds, grey semi-circles denote hydrophobic interactions made by CD86 and Pink semi-circles represent hydrophobic interactions made by the Spike RBD

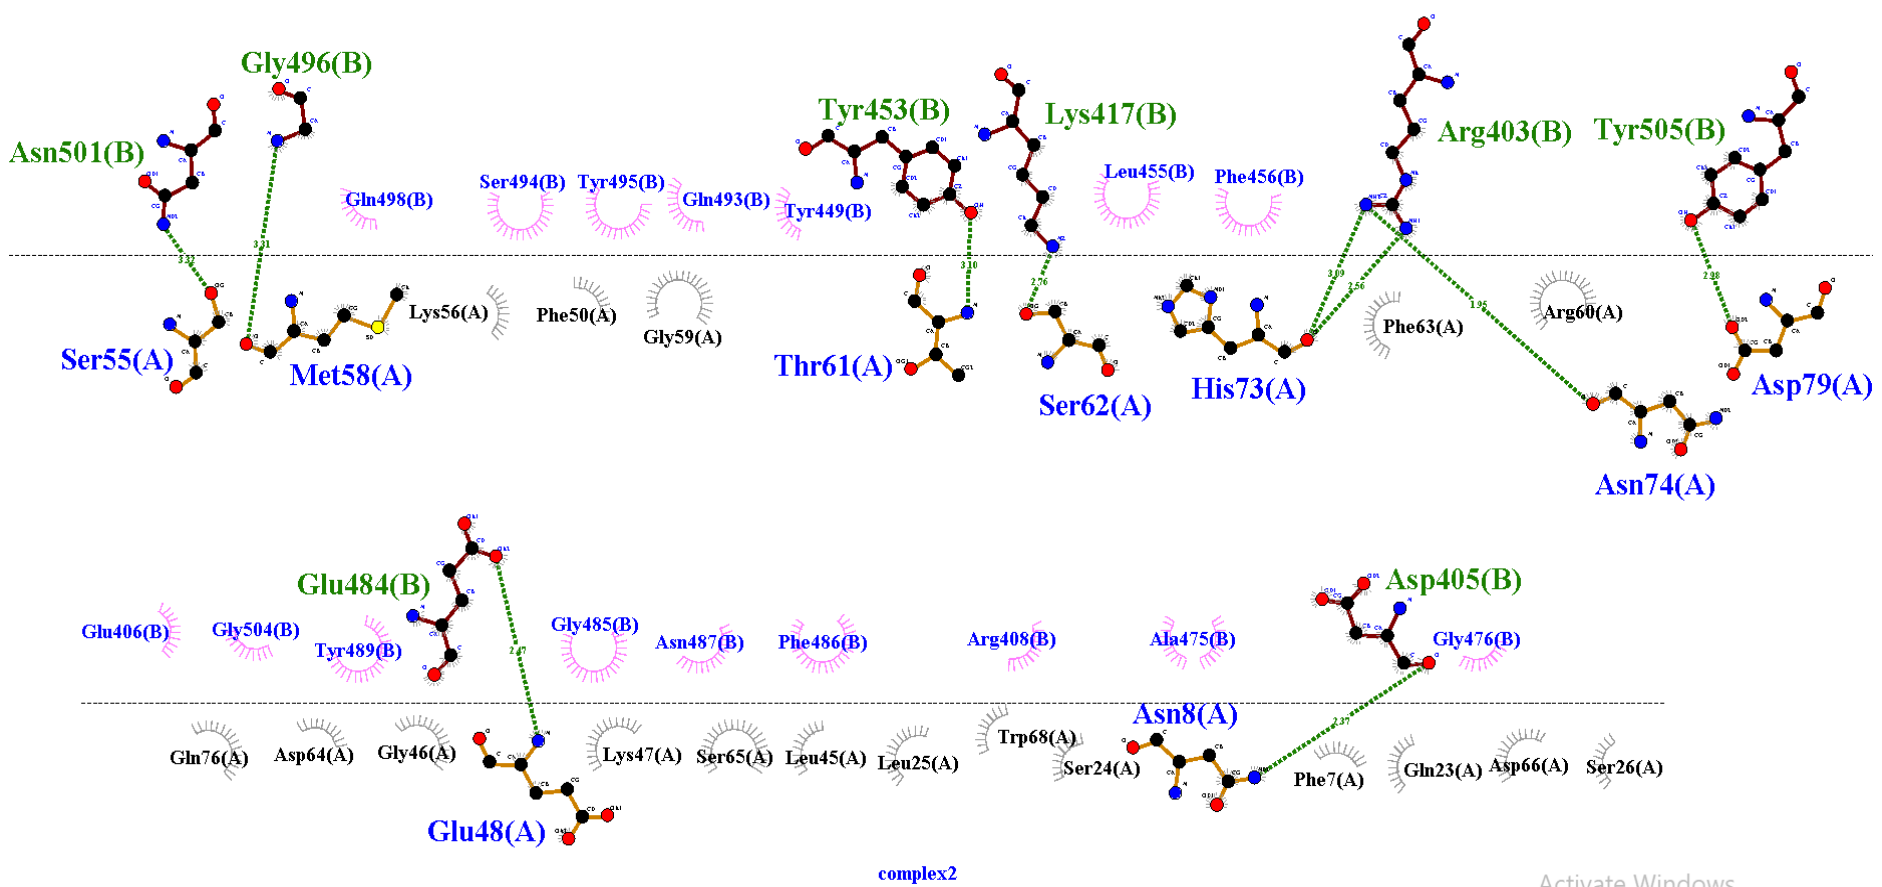

complex2

Activate Windows  
Go to Settings to activate Windows.

**Fig S23:** 2D representation of **CD86 (Chain A)** docking residues with Spike RBD (Chain B) Complex 9, provided by the LIGPLOT v.2.2 software. Olive Green lines represent hydrogen bonds, grey semi-circles denote hydrophobic interactions made by CD86 and Pink semi-circles represent hydrophobic interactions made by the Spike RBD .

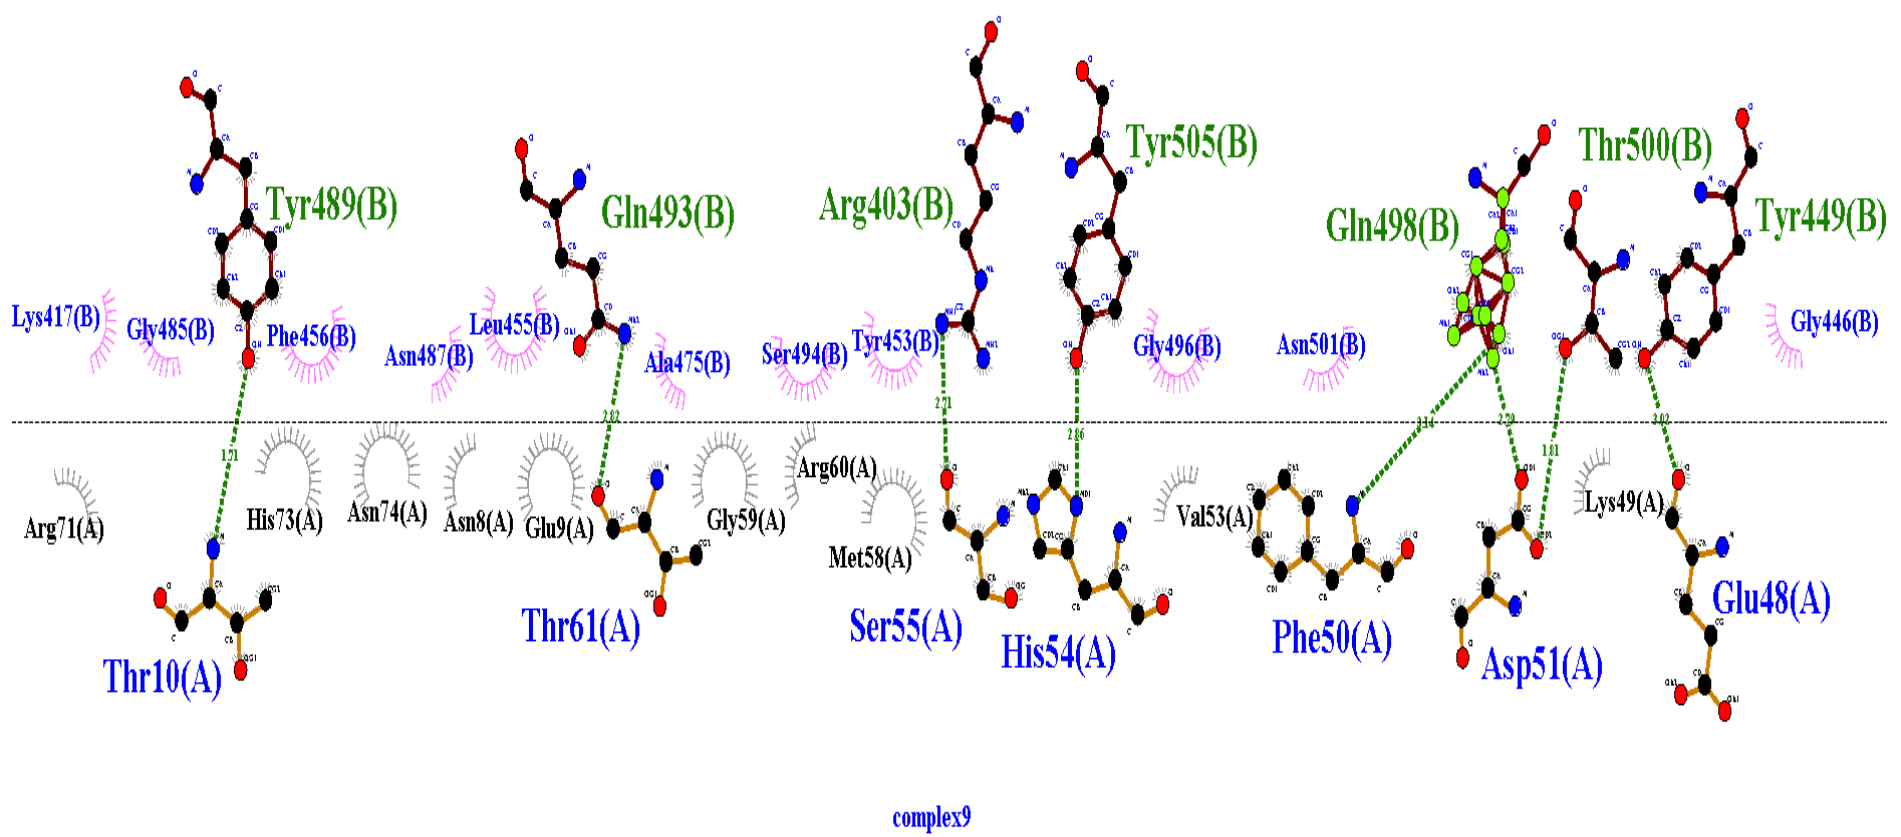

**Fig S24:** 2D representation of **CD95 (Chain F)** docking residues with Spike RBD (Chain B) Complex 2, provided by the LIGPLOT v.2.2 software. Olive Green lines represent hydrogen bonds, grey semi-circles denote hydrophobic interactions made Spike RBD by and Pink semi-circles represent hydrophobic interactions made by the **CD95**.

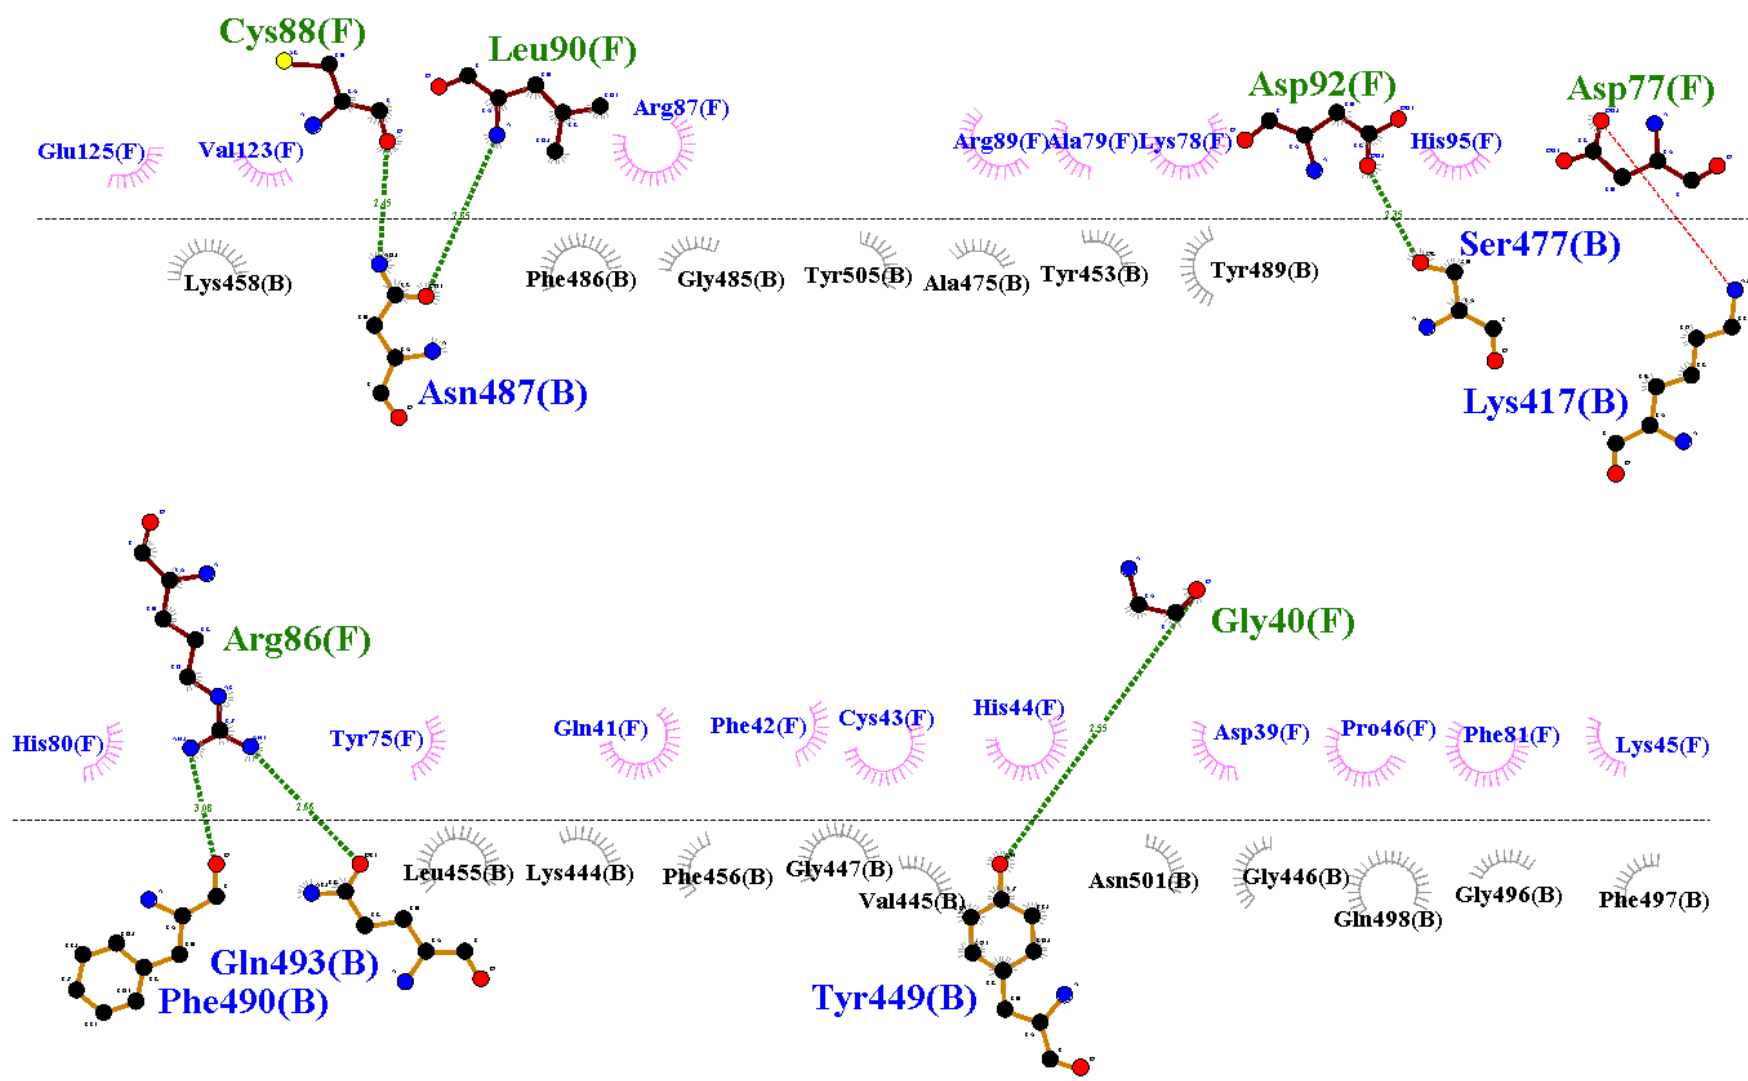



**Fig S25:** 2D representation of **CD95 (Chain F)** docking residues with Spike RBD (Chain B) Complex 10, provided by the LIGPLOT v.2.2 software. Olive Green lines represent hydrogen bonds, grey semi-circles denote hydrophobic interactions made Spike RBD by and Pink semi-circles represent hydrophobic interactions made by the **CD95**.

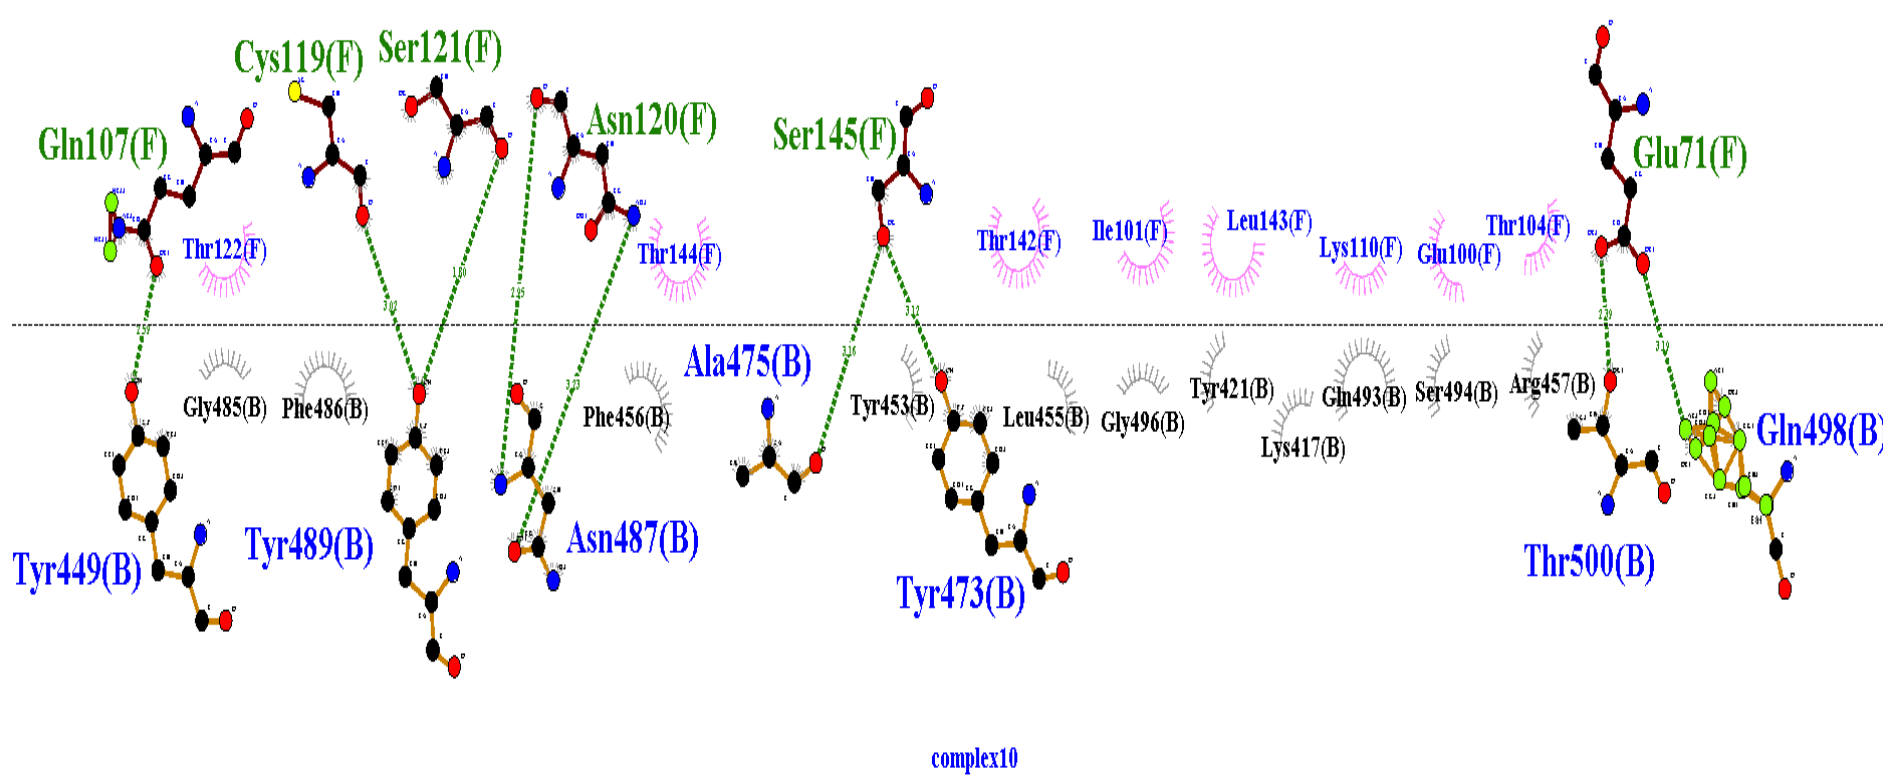

**Fig S26:** 2D representation of **CTLA4/CD152 (Chain A)** docking residues with Spike RBD (Chain B) Complex 2, provided by the LIGPLOT v.2.2 software. Olive Green lines represent hydrogen bonds, grey semi-circles denote hydrophobic interactions made by **CTLA4/CD152** and Pink semi-circles represent hydrophobic interactions made by the Spike RBD.

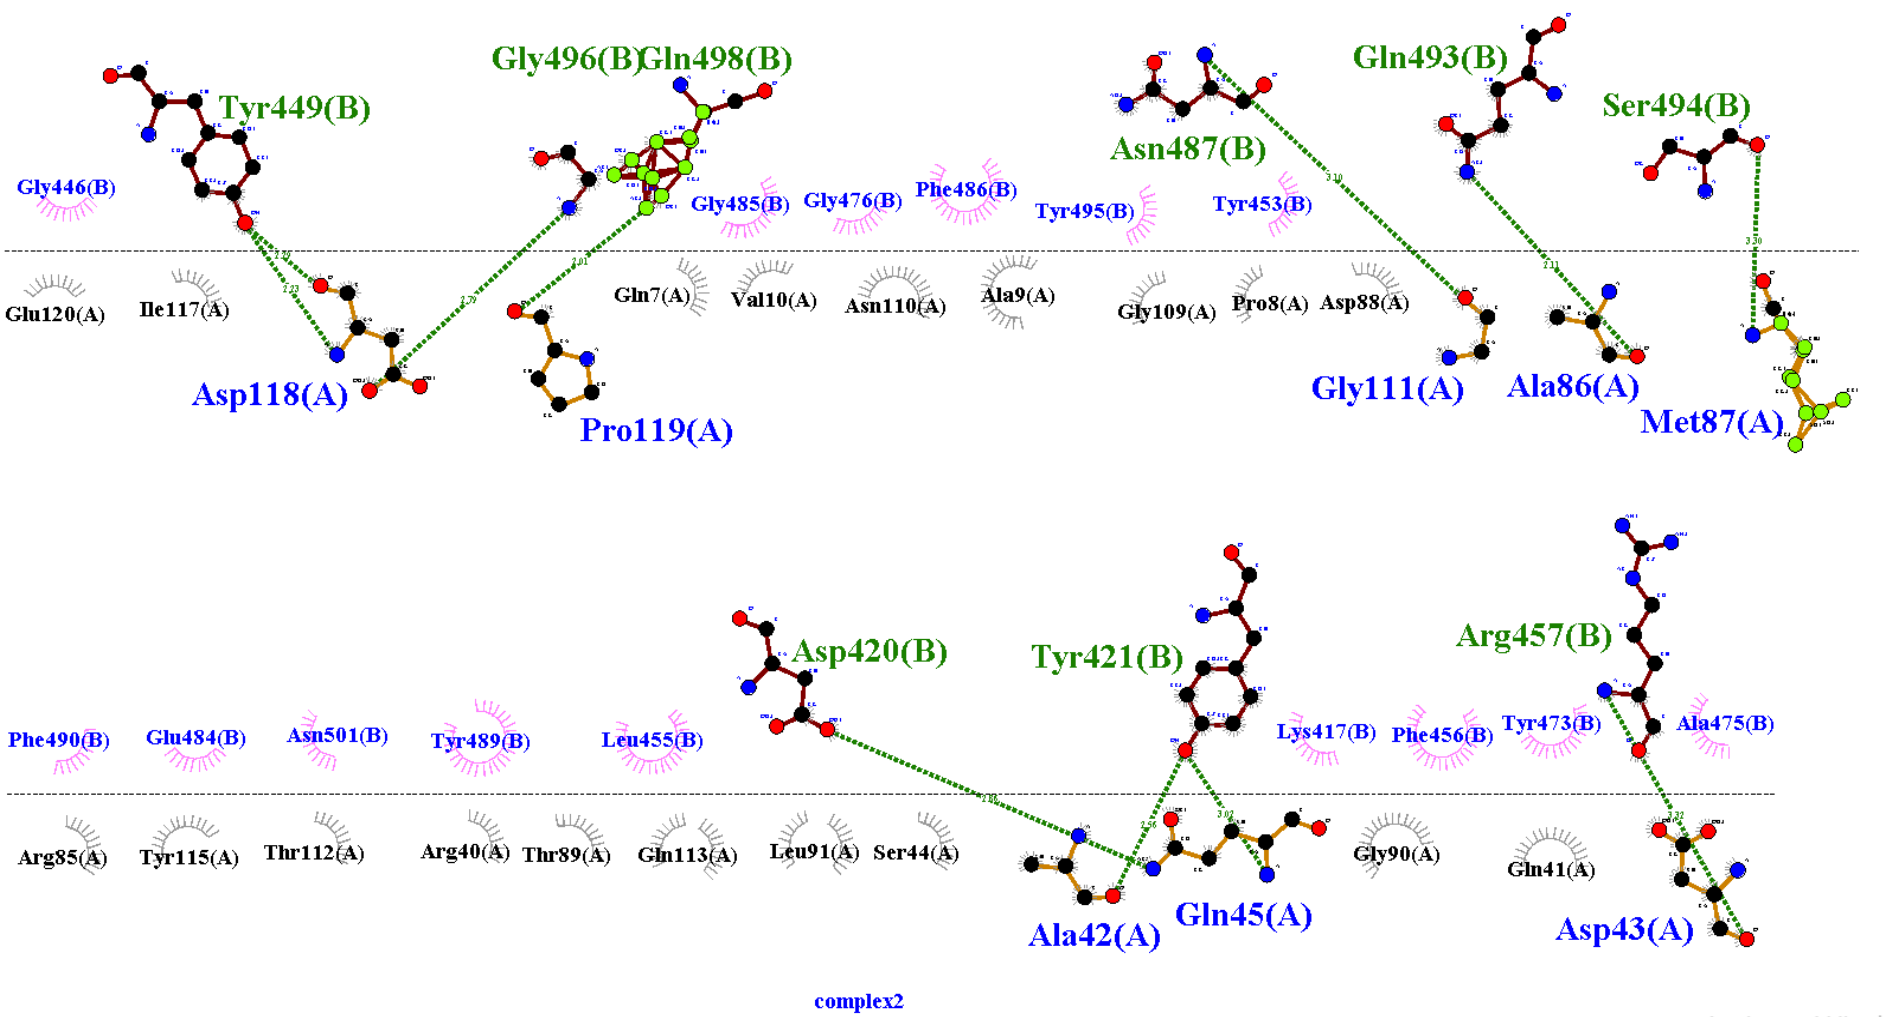

**Fig S27:** 2D representation of **CTLA4/CD152 (Chain A)** docking residues with Spike RBD (Chain B) Complex 3, provided by the LIGPLOT v.2.2 software. Olive Green lines represent hydrogen bonds, grey semi-circles denote hydrophobic interactions made by **CTLA4/CD152** and Pink semi-circles represent hydrophobic interactions made by the Spike RBD.

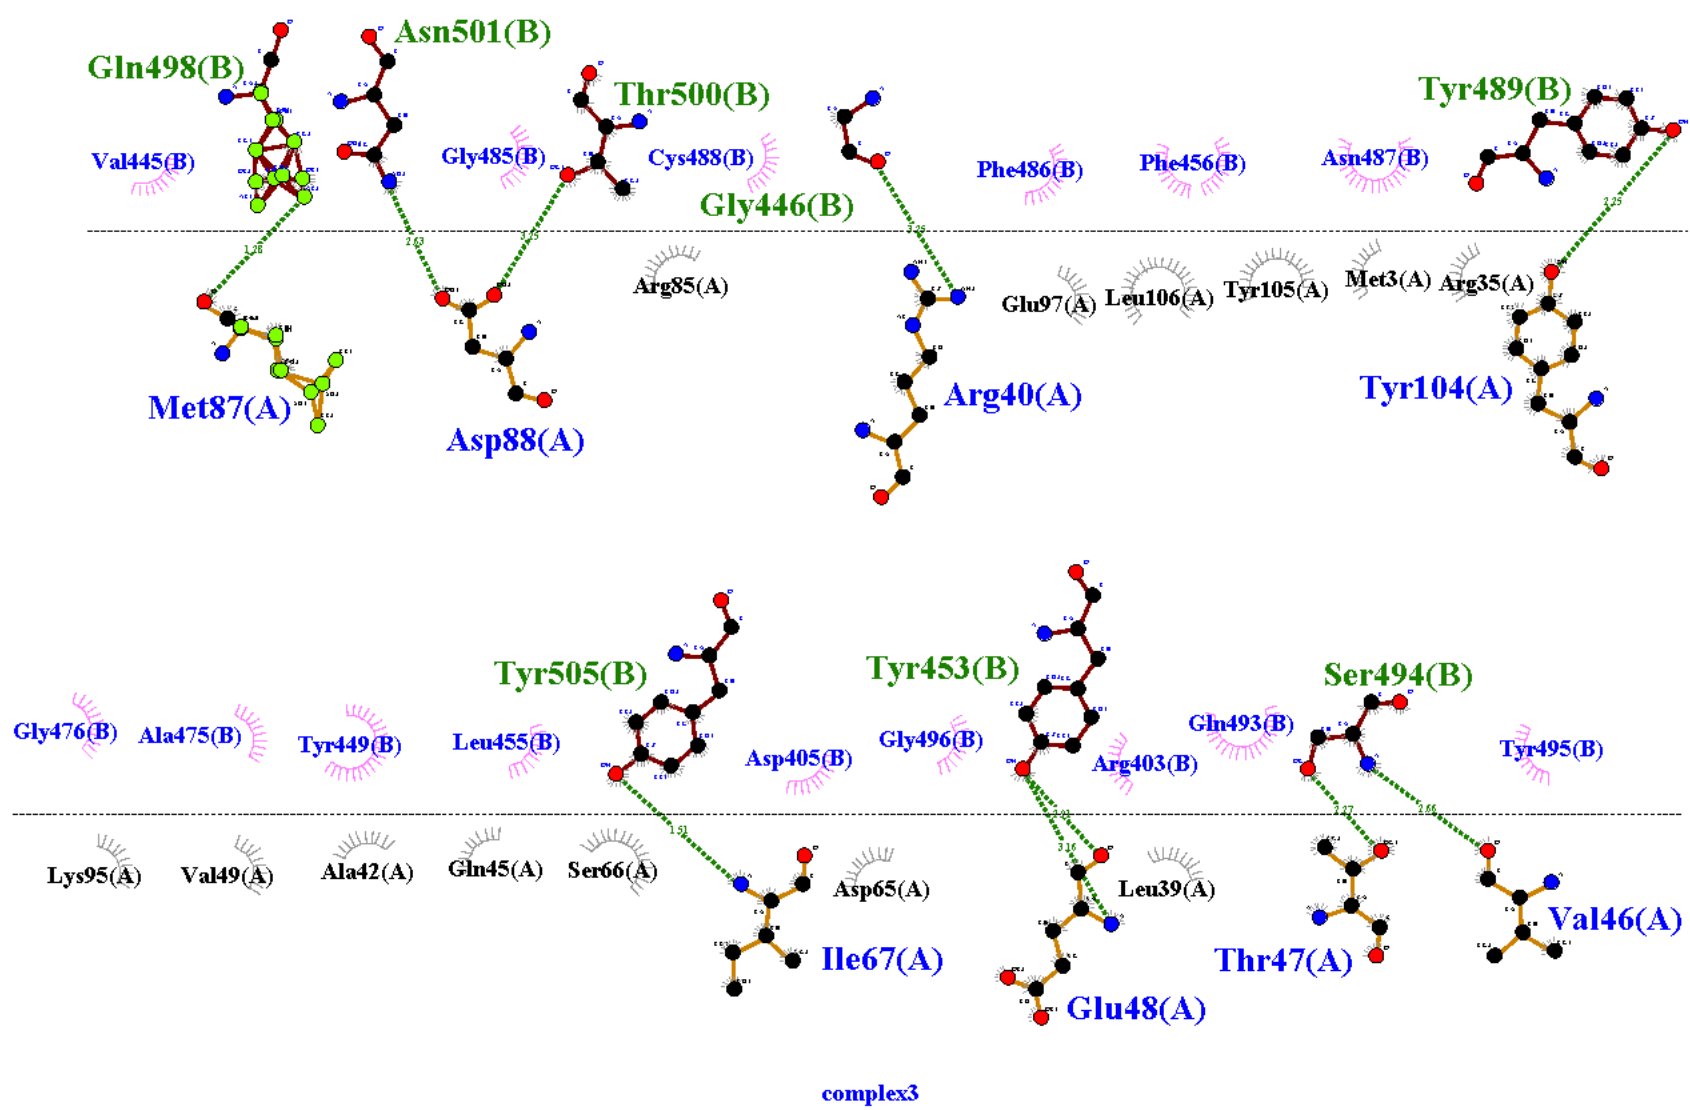

**Fig S28:** 2D representation of interacting residues between GCP2-GCP3 (PDB: 6V6B , Chain C: GCP2 & Chain B: GCP3 ), provided by the LIGPLOT v.2.2 software. Olive Green lines represent hydrogen bonds, grey semi-circles denote hydrophobic interactions made by GCP3 and Pink semi-circles represent hydrophobic interactions made by the GCP2.

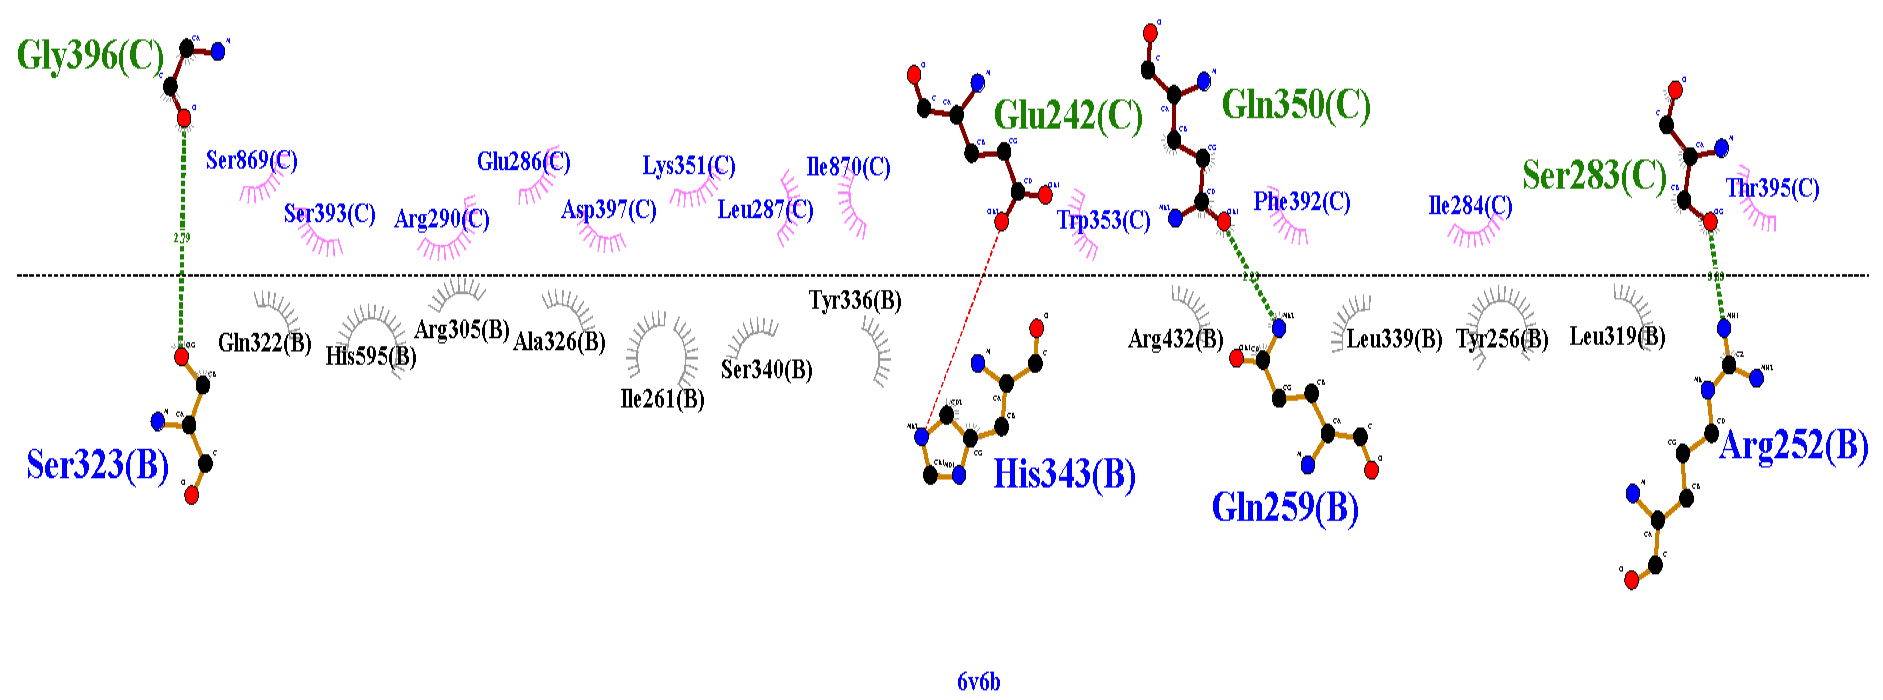

**Fig S29:** 2D representation of interacting residues between GCP2-TUBG1 (PDB: 6V6S , Chain C: GCP2 & Chain c: TUBG1). provided by the LIGPLOT v.2.2 software. Olive Green lines represent hydrogen bonds, grey semi-circles denote hydrophobic interactions made by GCP2 and Pink semi-circles represent hydrophobic interactions made by the TUBG1.

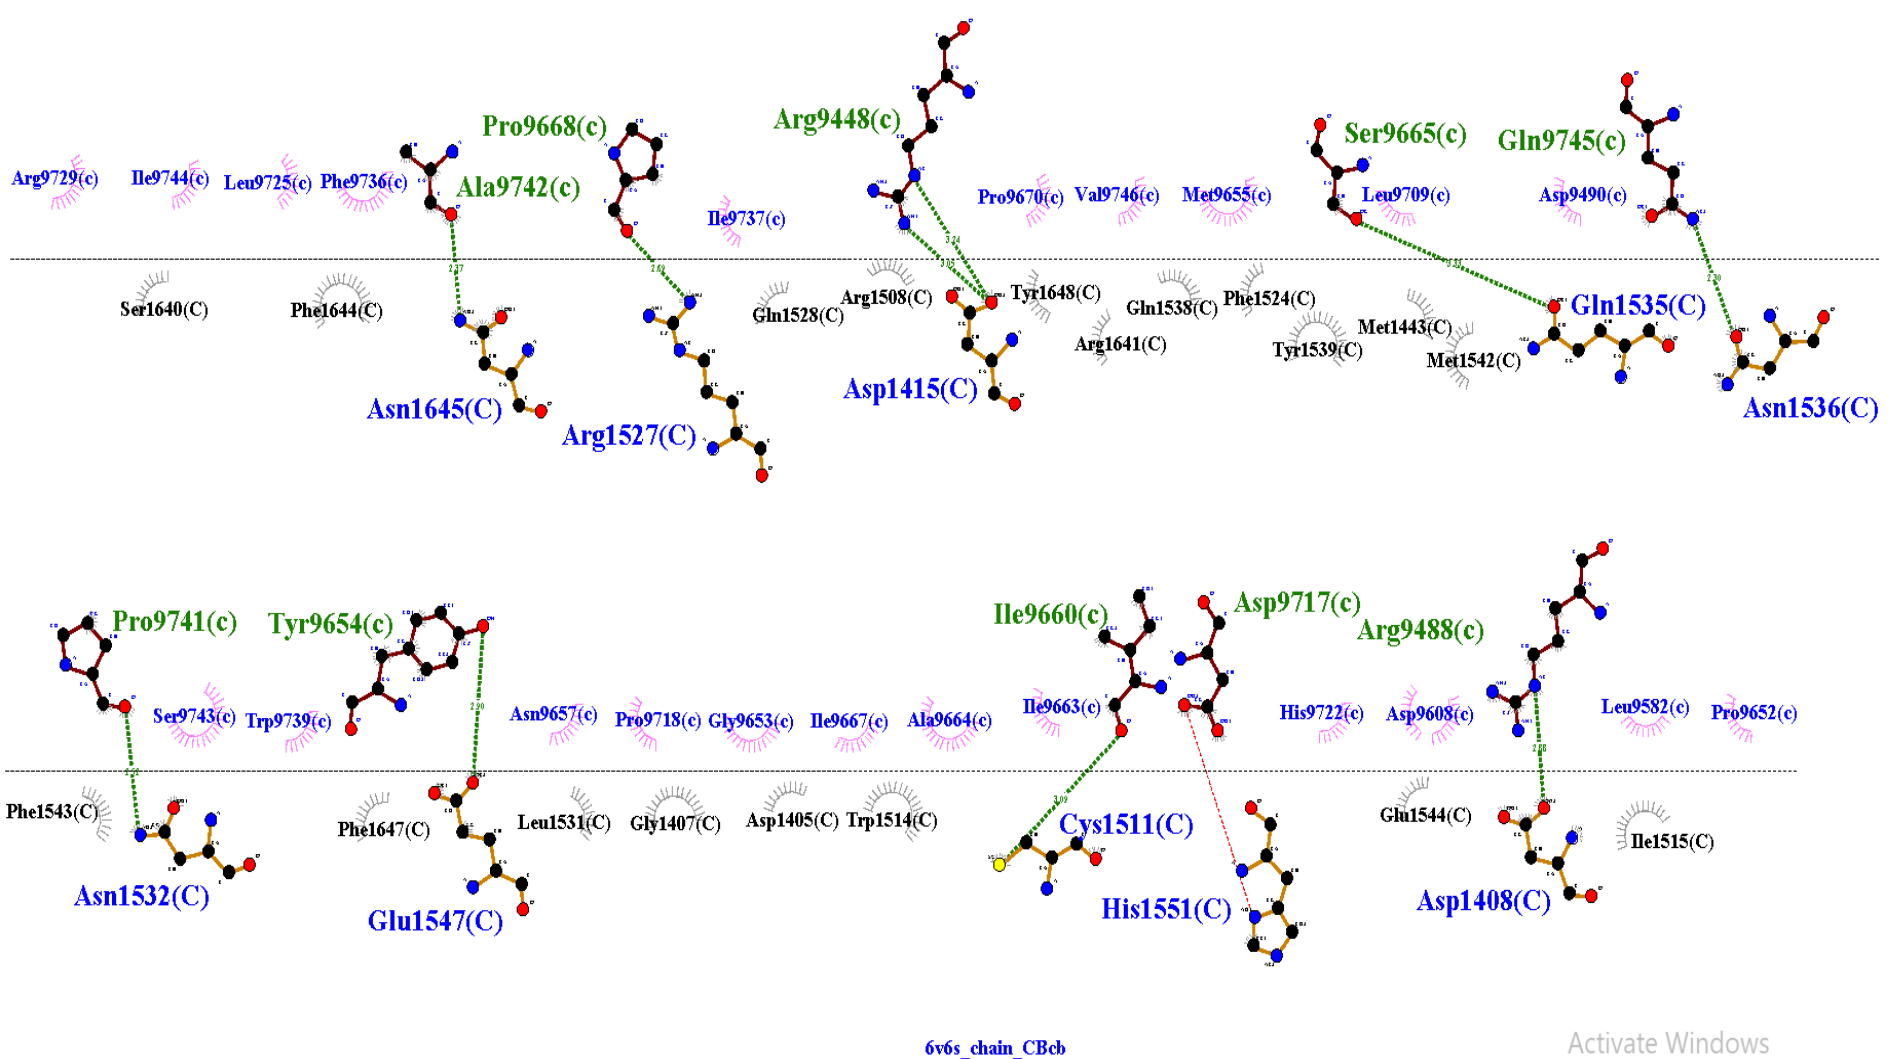

**Fig S30:** Representing the interacting residues between GCP2-TUBG1 (PDB: 6V6S , Chain C: GCP2 & Chain c: TUBG1) and its corresponding residues in PDB ID 6V6B (Chain C) and PDB ID 6V5V (Chain g)

**PDB ID: 6V6S GPC2**

**(Chain C): TUBG1 (Chain c)**

Asn1645:Ala9742

Arg1527:Pro9668

Asp1415:Arg9448

Gln1535:Ser9665

Asn1536:Gln9745

Asn1532:Pro9741

Glu1547:Tyr9654

Cys1511:Ile9660

His1551:Asp9717

Asp1408:Arg9488

**PDB ID: 6V6B GPC2**

**(Chain C): PDB ID 6V5V TUBG1 (Chain g)**

Asn890:Ala354

Arg711:Pro262

Asp561:Arg3

Gln719:Ser259

Asn720:Gln357

Asn716:Pro353

Glu731:Tyr248

Cys684:Ile254

His735:Asp329

Asp554:Arg47



**Fig S32:** Representing the interacting residues between GCP3-TUBG1 (PDB: 6V6S , Chain B: GCP2 & Chain b: TUBG1) and its corresponding residues in PDB ID 6V6B (Chain C) and PDB ID 6V5V (Chain g)

| PDB ID: 6V6S GPC3          | PDB ID: 6V6B GPC3                      |
|----------------------------|----------------------------------------|
| (Chain B): TUBG1 (Chain b) | (Chain B): PDB ID 6v5v TUBG1 (Chain g) |
| His1108:Trp9369            | His885:Trp351                          |
| Lys920:Lys9210             | Lys682:Lys163                          |
| Ser947:Pro9298             | Ser709:Pro265                          |
| Arg919: Pro9298            | Arg681: Pro265                         |
| Glu1107:Arg9359            | Glu884:Arg341                          |
| Gln955:Gln9375             | Gln717:Gln357                          |
| Gln955:Ser9373             | Gln717:Ser355                          |
| Glu963:His9352             | Glu725:His334                          |
| Lys927:Asn9236             | Lys689:Asn198                          |
| Cys924:Pro9209             | Cys686:Pro162                          |
| Gln957:Tyr9284             | Gln719:Tyr248                          |
| Lys909: Tyr9284            | Lys671: Tyr248                         |
| Asp814:Arg9118             | Asp572:Arg47                           |
| Arg817:Asp9288             | Arg575:Asp252                          |
| Asp821:Arg9078             | Asp579:Arg3                            |
| Asn851:Thr9116             | Asn609:Thr45                           |



**Fig S33:** 2D representation of interacting residues between GCP2 (Chain C) and CoV-2 M Protein (Chain A), Complex 7, provided by the LIGPLOT v.2.2 software. Olive Green lines represent hydrogen bonds, grey semi-circles denote hydrophobic interactions made by GCP2 and Pink semi-circles represent hydrophobic interactions made by the CoV-2 M Protein .

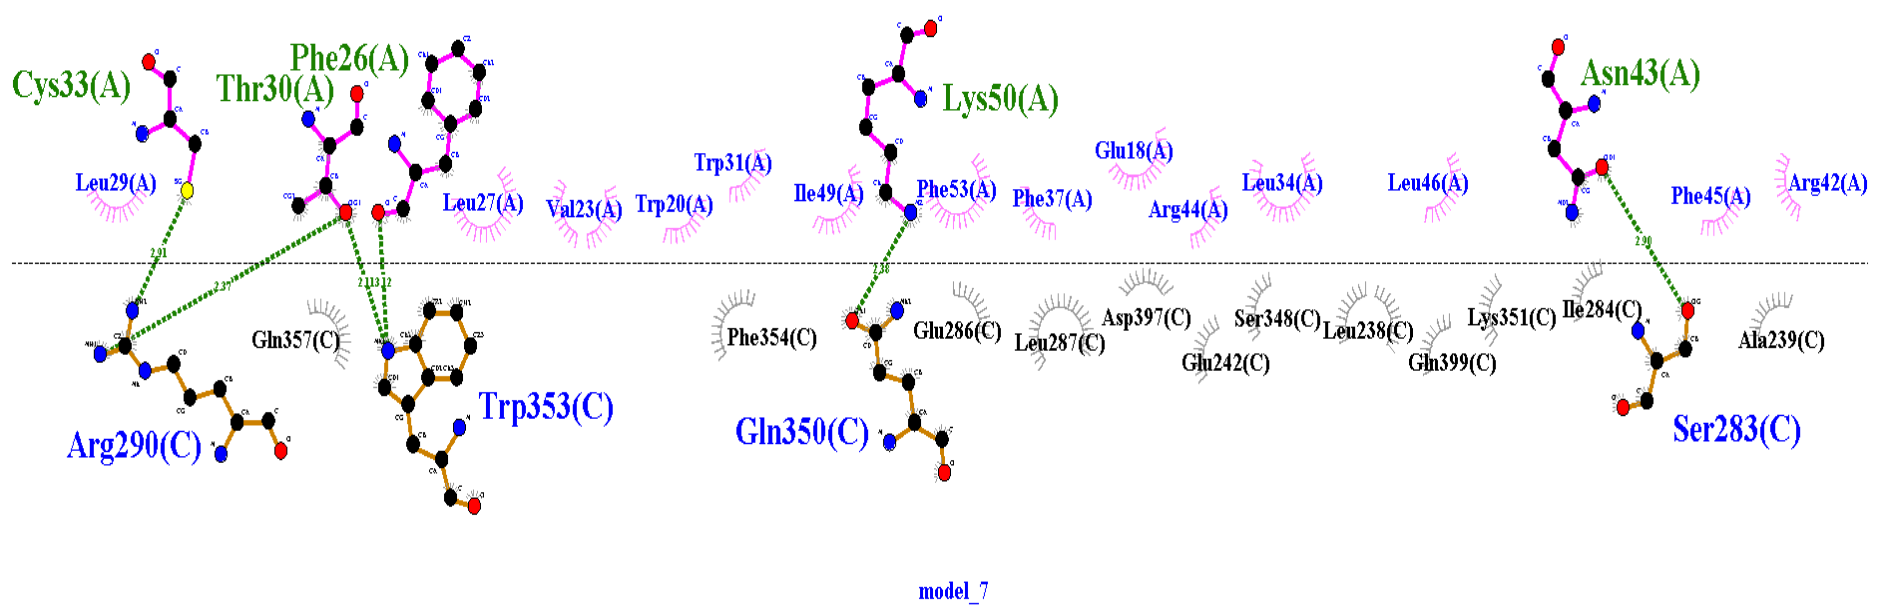

**Fig S34:** 2D representation of interacting residues between GCP2 (Chain C) and CoV-2 M Protein (Chain A), Complex 3, provided by the LIGPLOT v.2.2 software. Olive Green lines represent hydrogen bonds, grey semi-circles denote hydrophobic interactions made by GCP2 and Pink semi-circles represent hydrophobic interactions made by the CoV-2 M Protein .

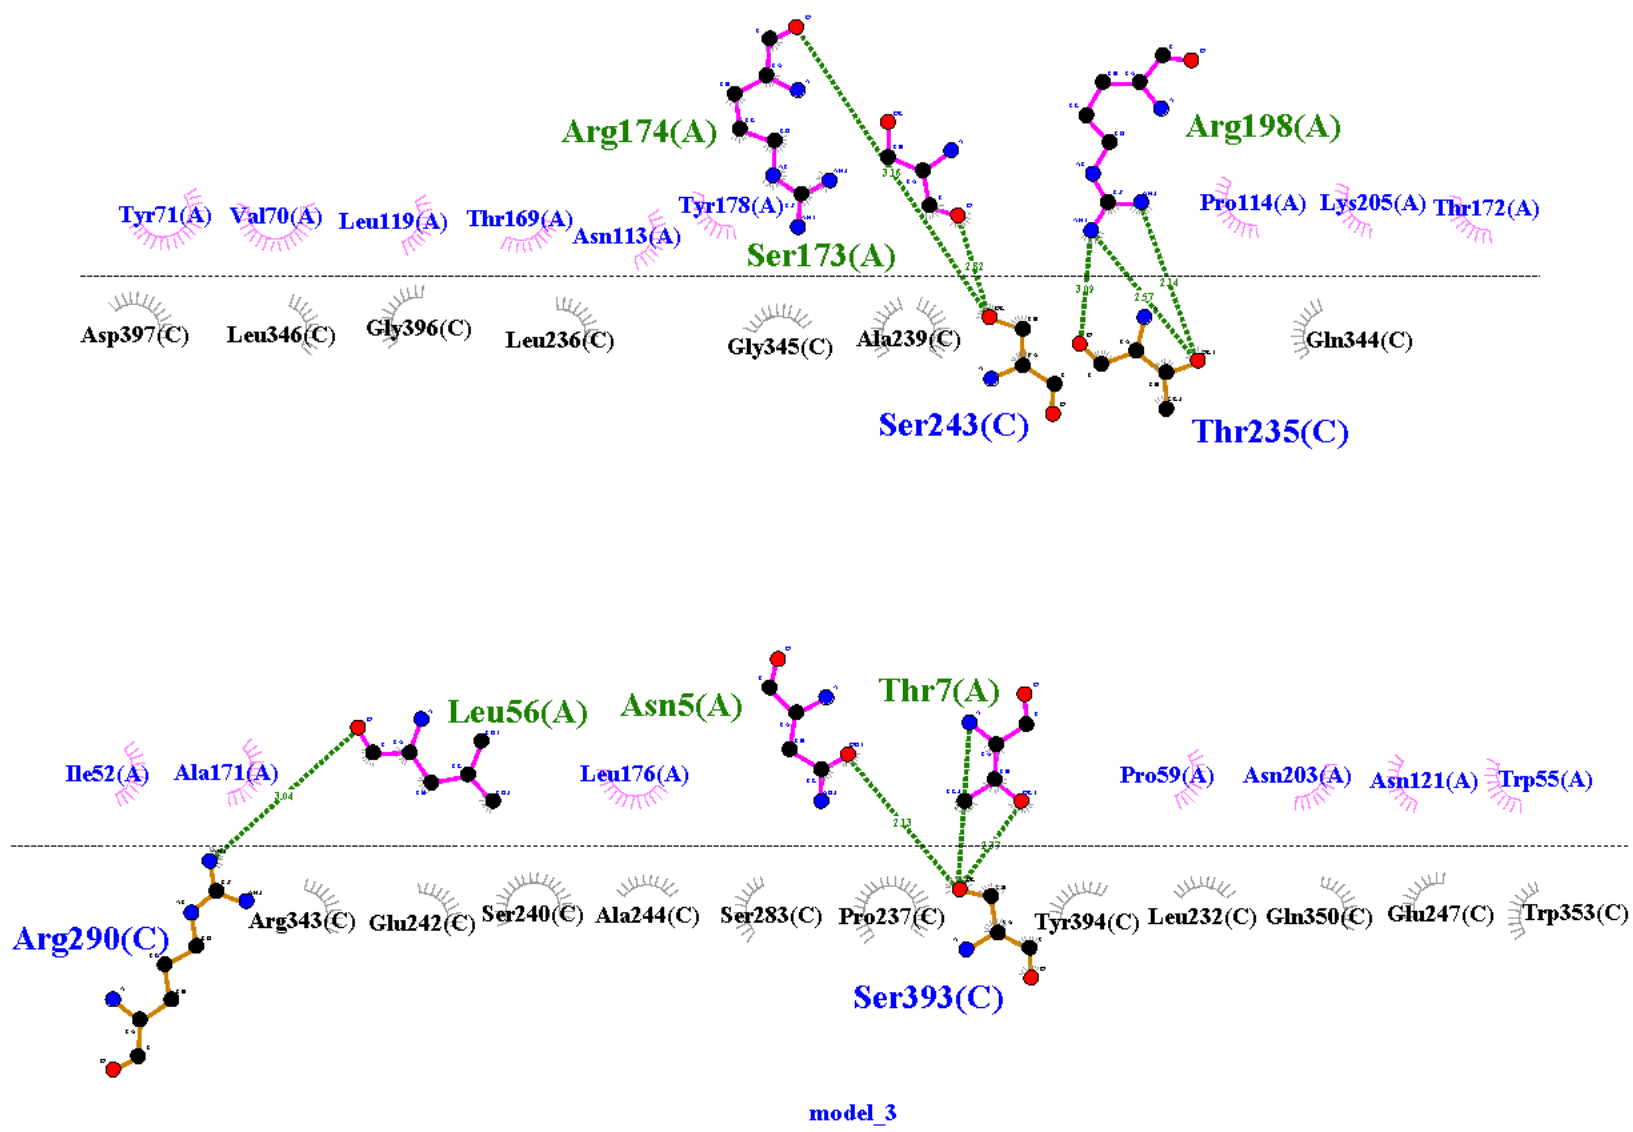

**Fig S35:** 2D representation of interacting residues between GCP2 (Chain C) and Orf3a (Chain A), Complex 4, provided by the LIGPLOT v.2.2 software. Olive Green lines represent hydrogen bonds, grey semi-circles denote hydrophobic interactions made by GCP2 and Pink semi-circles represent hydrophobic interactions made by the Orf3a .

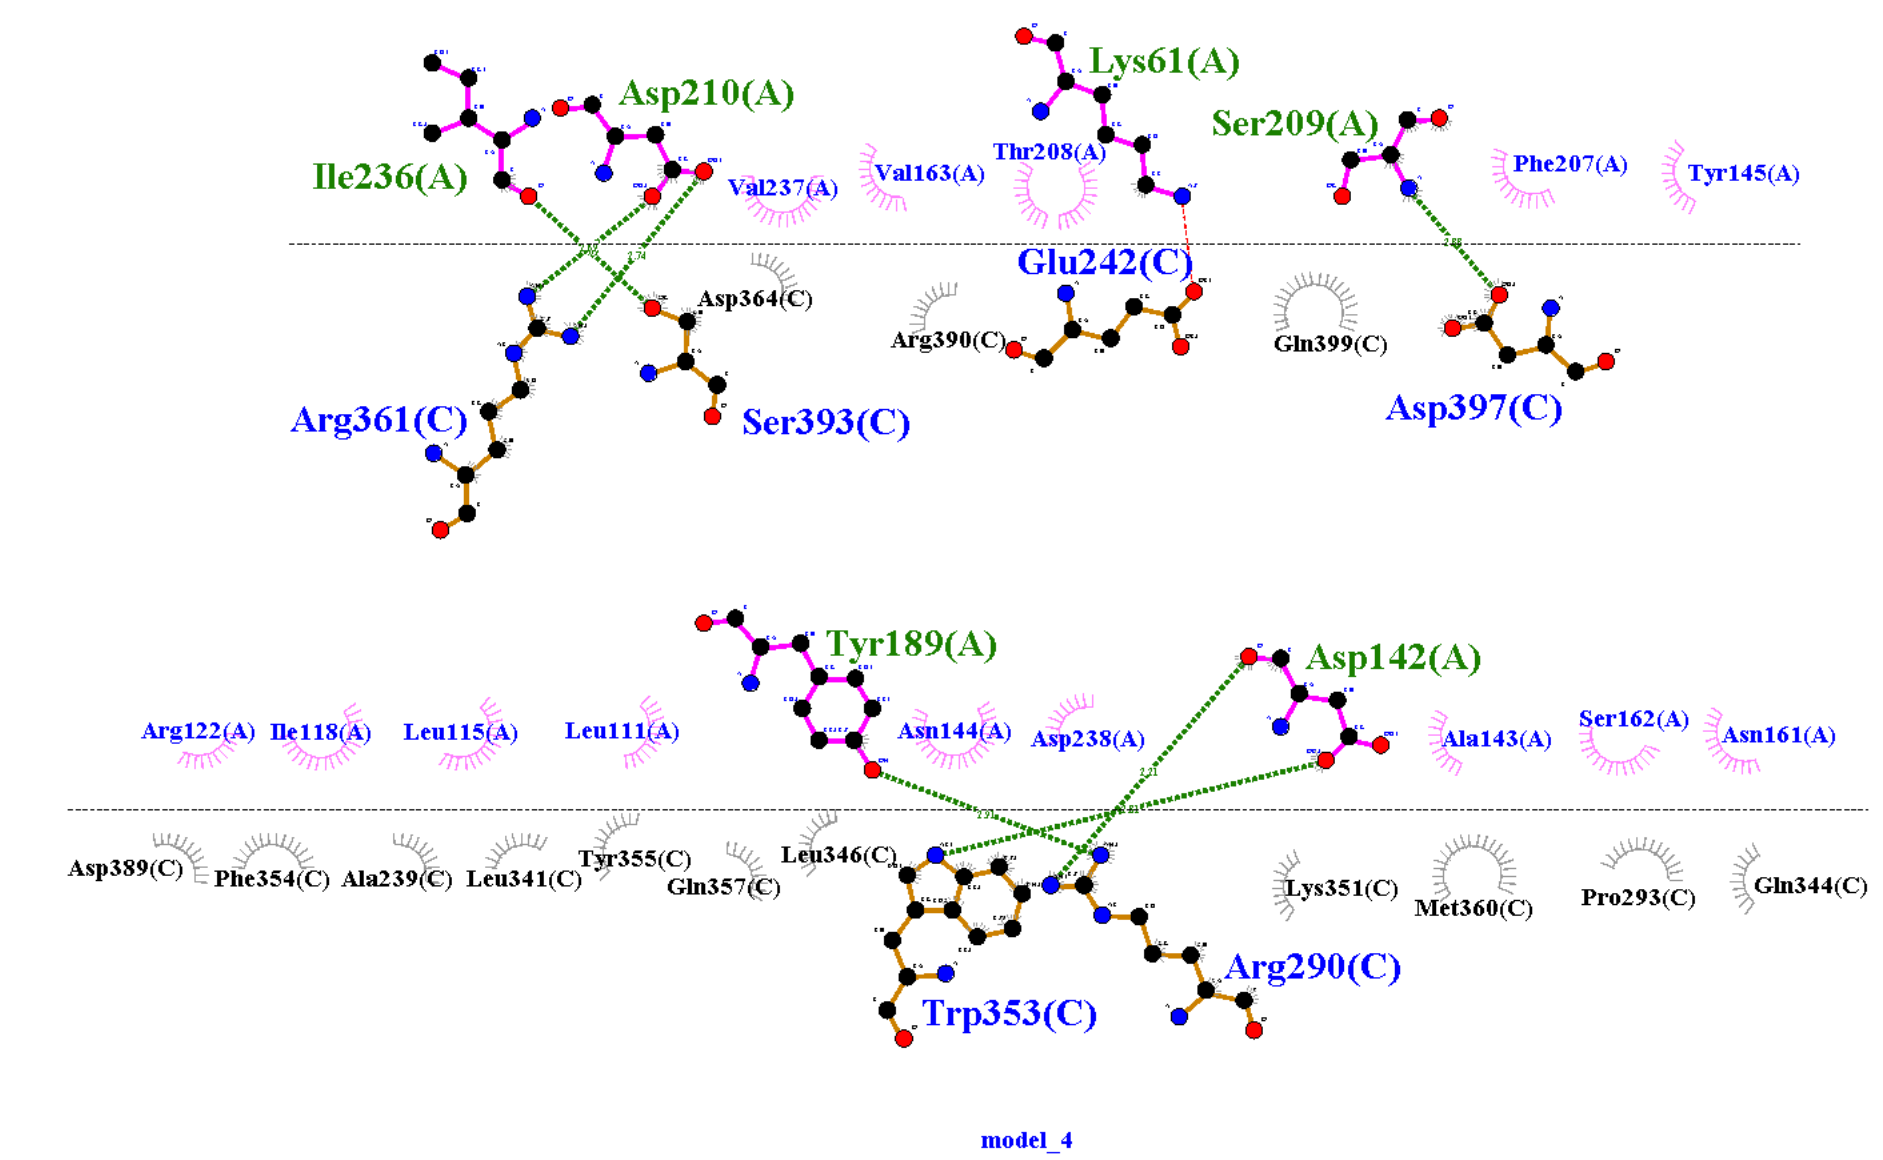

**Fig S36:** 2D representation of interacting residues between GCP3 (Chain B) and Orf3a (Chain A), Complex 7, provided by the LIGPLOT v.2.2 software. Olive Green lines represent hydrogen bonds, grey semi-circles denote hydrophobic interactions made by GCP3 and Pink semi-circles represent hydrophobic interactions made by the Orf3a .

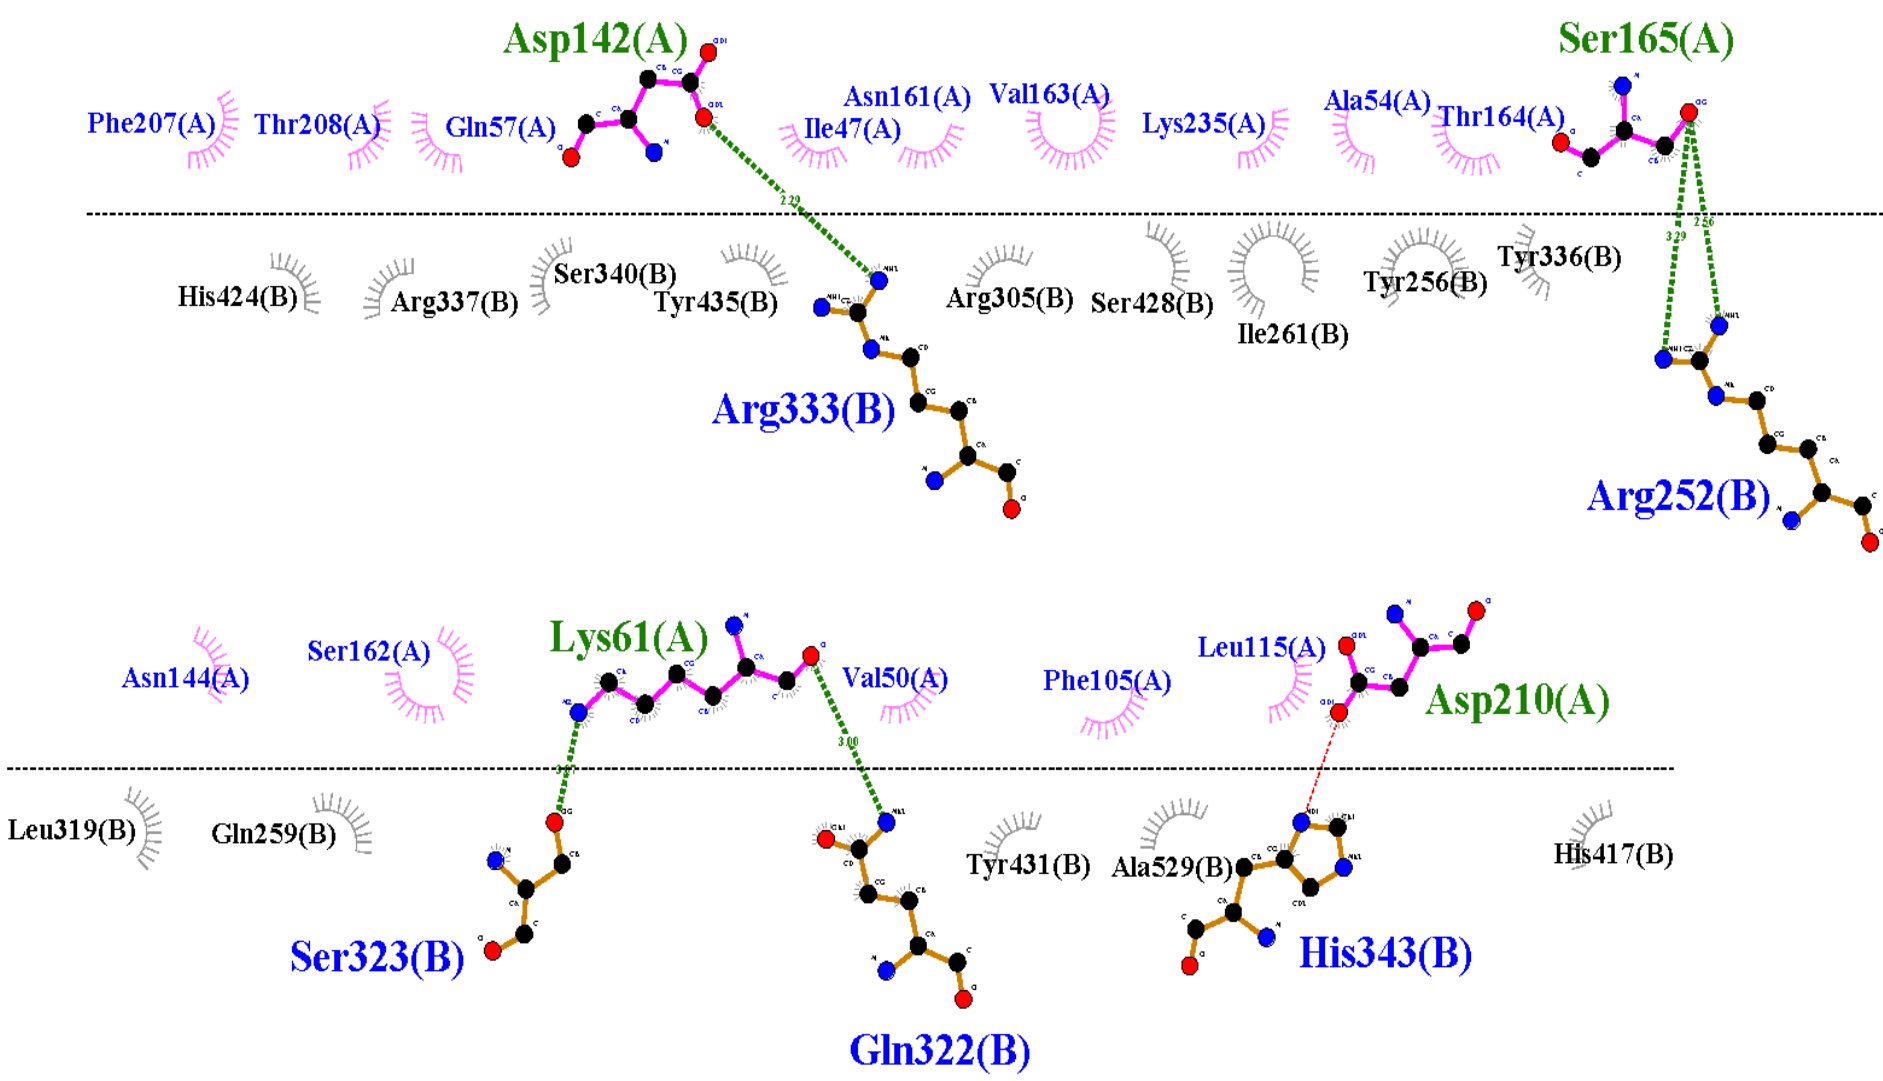

**Fig S37:** 2D representation of interacting residues between GCP3 (Chain B) and Orf3a (Chain A), Complex 3, provided by the LIGPLOT v.2.2 software. Olive Green lines represent hydrogen bonds, grey semi-circles denote hydrophobic interactions made by GCP3 and Pink semi-circles represent hydrophobic interactions made by the Orf3a .

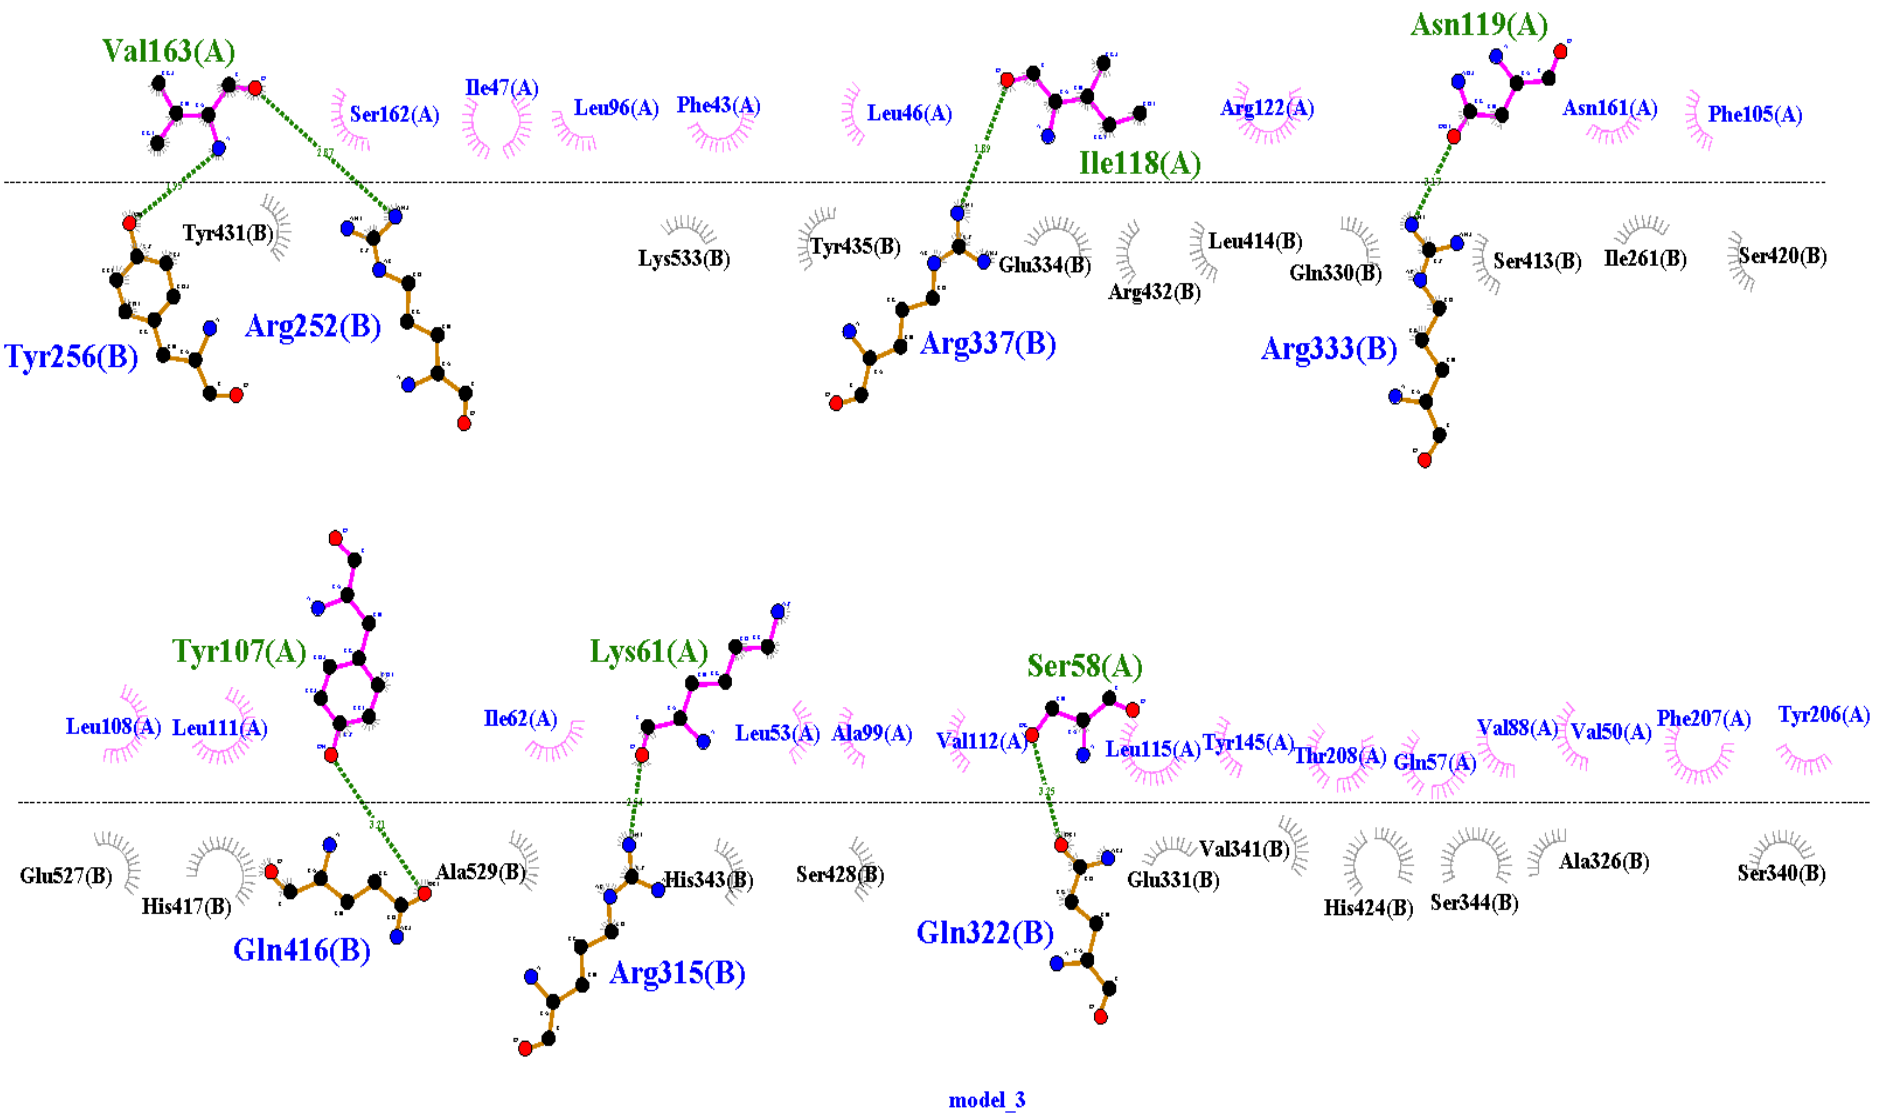



**Fig S39:** 2D representation of interacting residues between GCP2 (At GCP2 residues that interact with TUBG1) (Chain C) and M Protein (Chain A), Complex 1 , provided by the LIGPLOT v.2.2 software. Olive Green lines represent hydrogen bonds, grey semi-circles denote hydrophobic interactions made by GCP2 and Pink semi-circles represent hydrophobic interactions made by the M Protein.

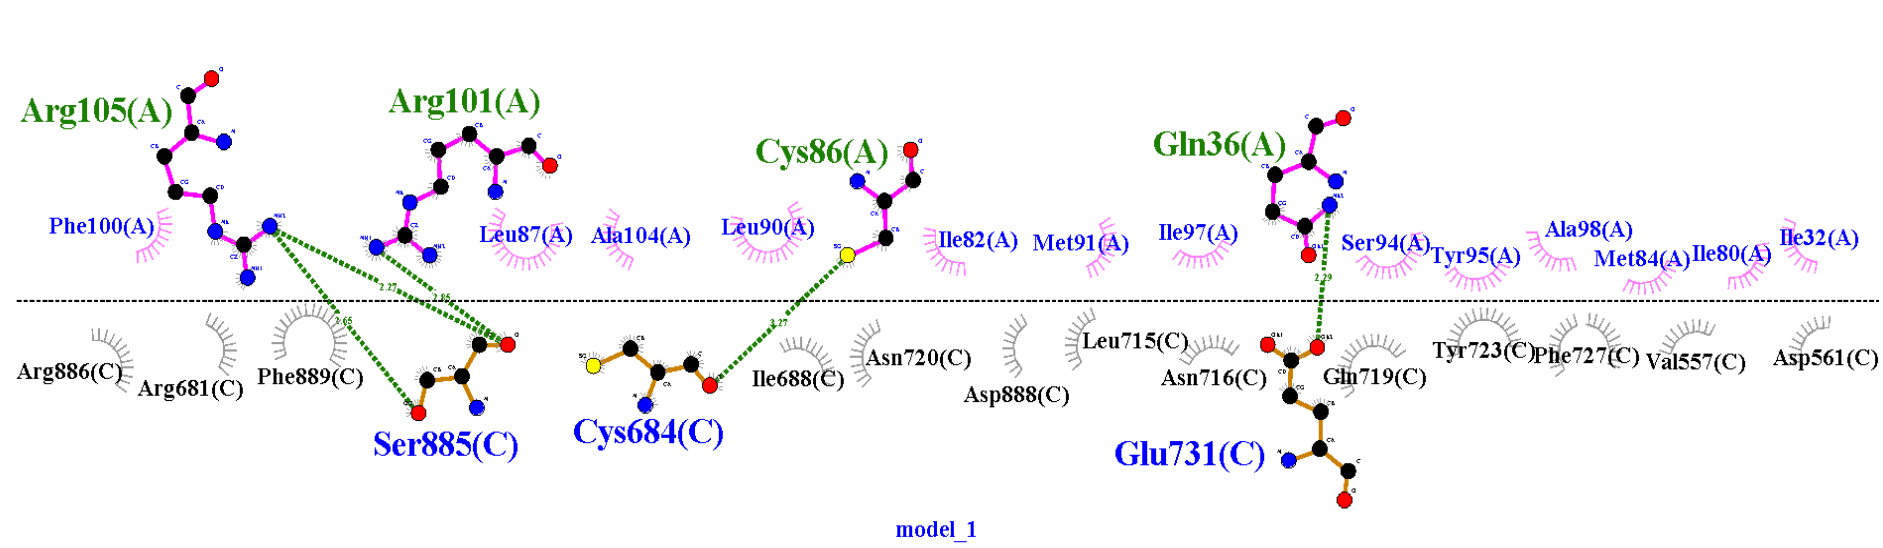

**Fig S40:** 2D representation of interacting residues between GCP3 ( AtGCP3 residues that interact with TUBG1) (Chain B) and M Protein (Chain A), Complex 1, , provided by the LIGPLOT v.2.2 software. Olive Green lines represent hydrogen bonds, grey semi-circles denote hydrophobic interactions made by GCP3 and Pink semi-circles represent hydrophobic interactions made by the M Protein.

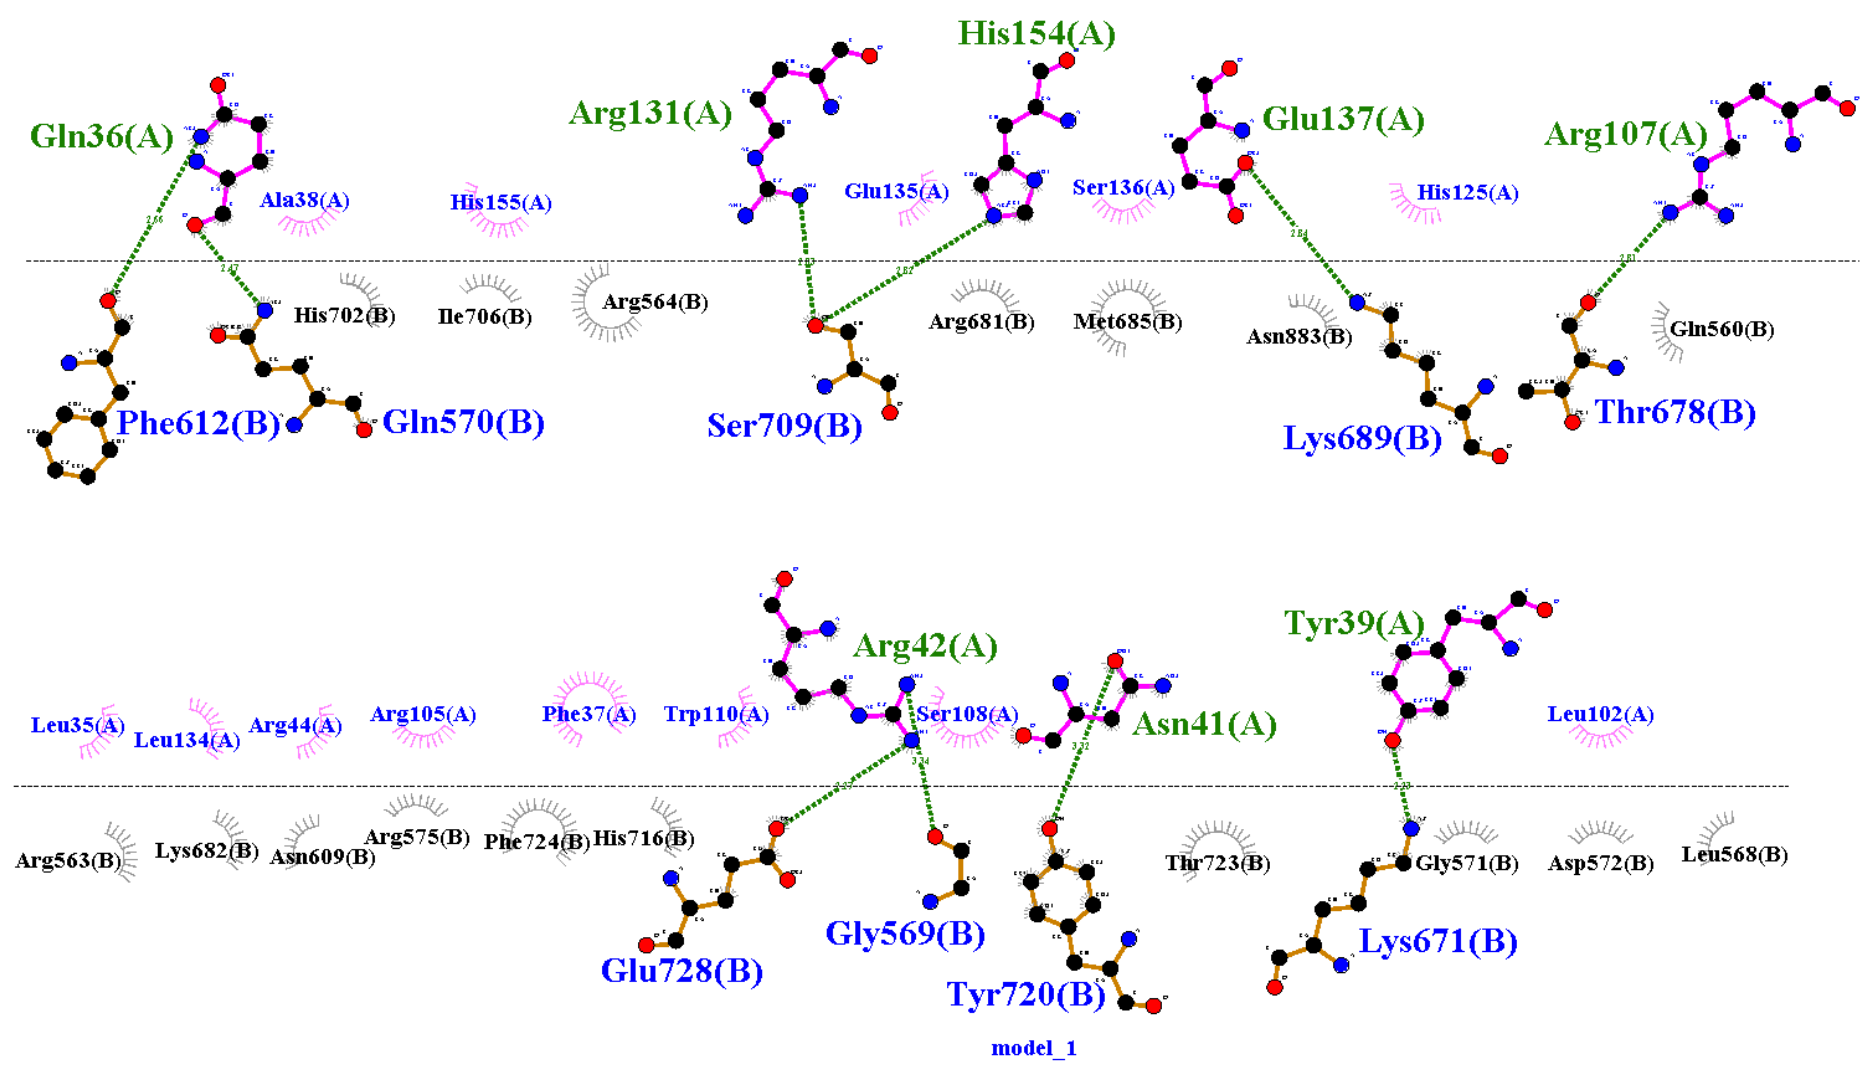



**Fig S41:** 2D representation of interacting residues between GCP3 ( AtGCP3 residues that interact with TUBG1) (Chain B) and M Protein (Chain A), Complex 5, provided by the LIGPLOT v.2.2 software. Olive Green lines represent hydrogen bonds, grey semi-circles denote hydrophobic interactions made by GCP3 and Pink semi-circles represent hydrophobic interactions made by the M Protein.

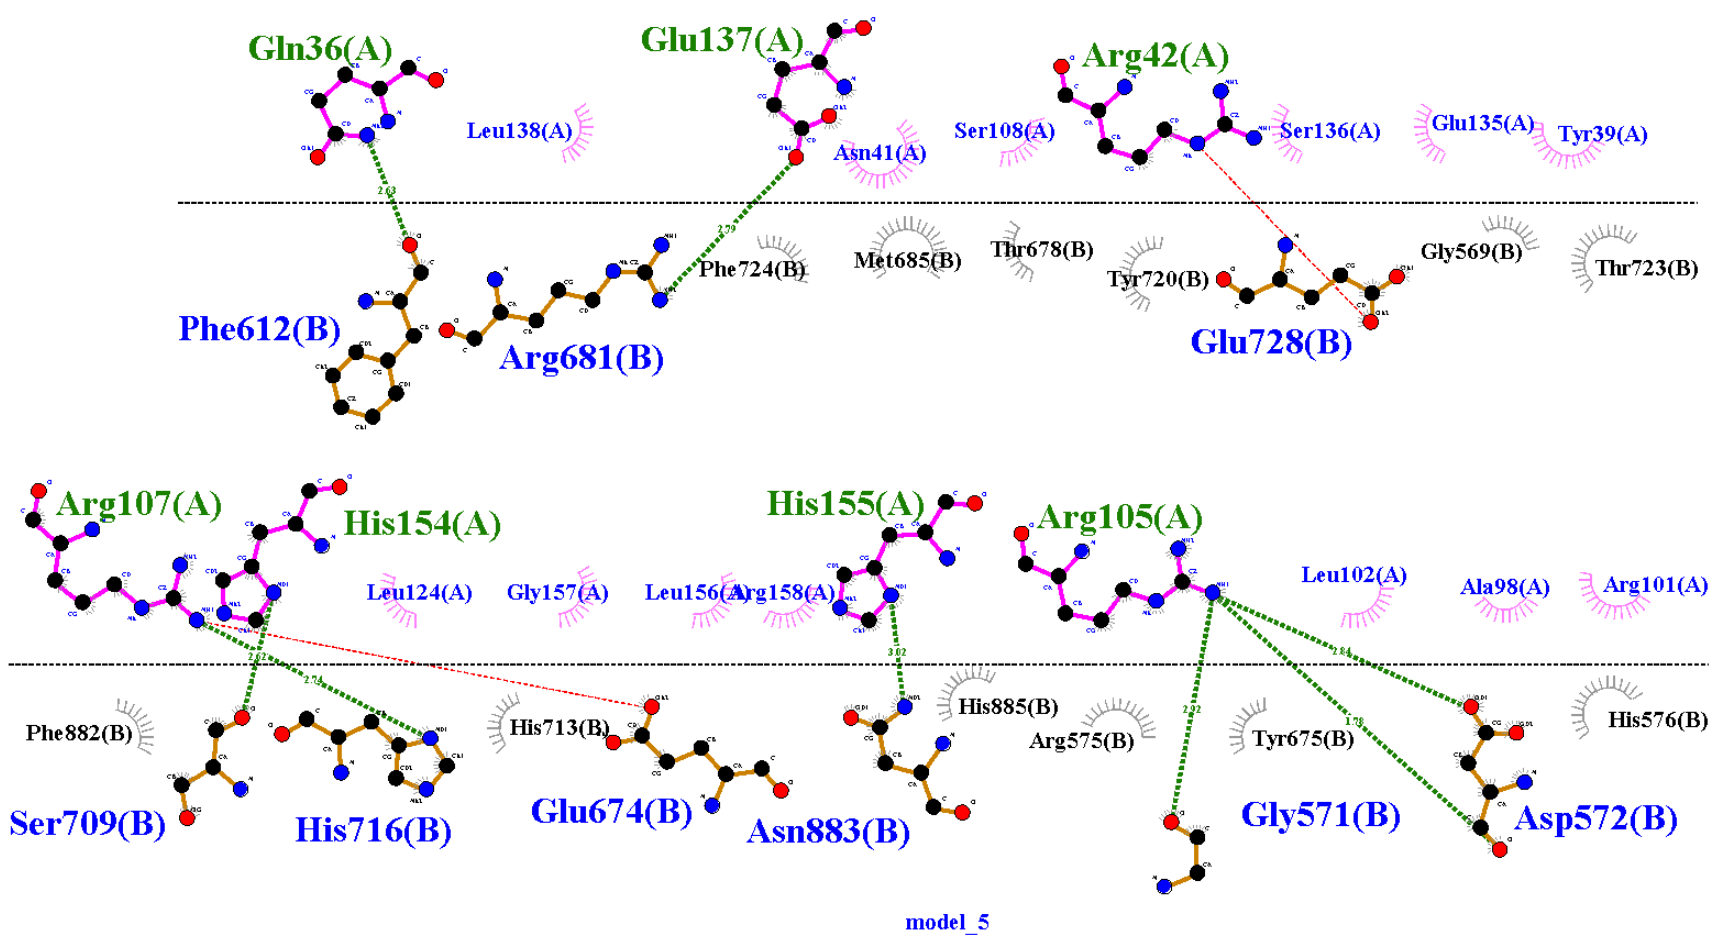

**Fig S42:** 2D representation of interacting residues between GCP2 (At GCP2 residues that interact with TUBG1) (Chain C) and Orf3a (Chain A), Complex 3, provided by the LIGPLOT v.2.2 software. Olive Green lines represent hydrogen bonds, grey semi-circles denote hydrophobic interactions made by GCP2 and Pink semi-circles represent hydrophobic interactions made by the Orf3a.

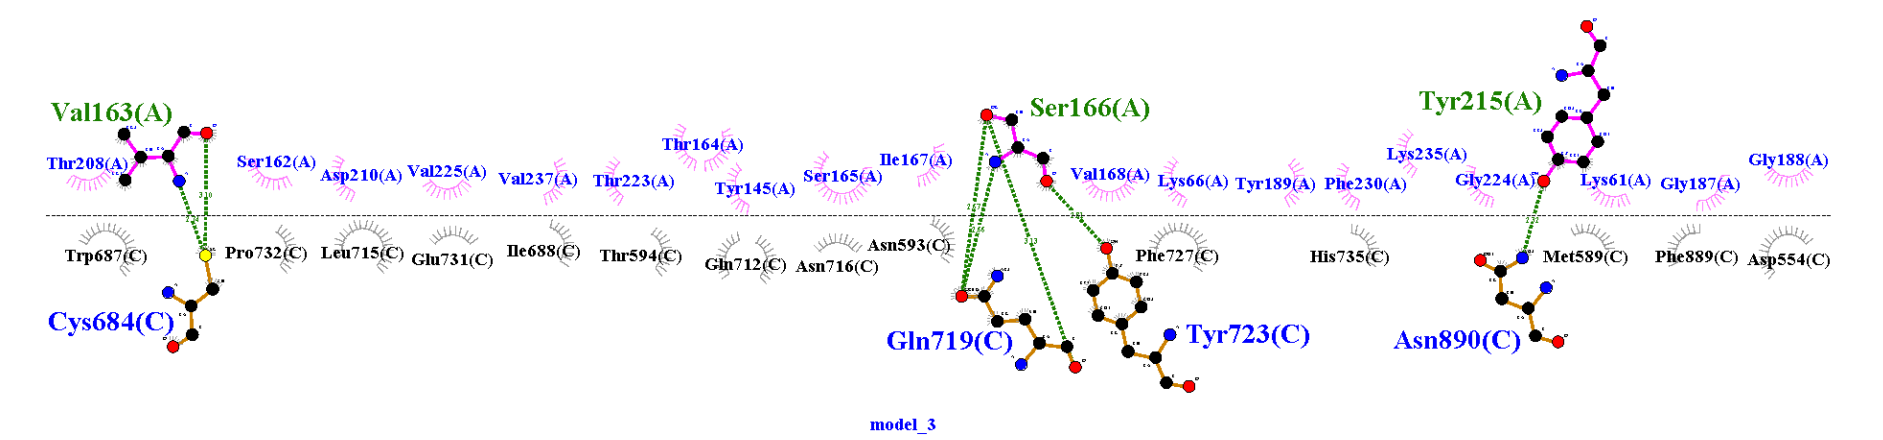

**Fig S43:** 2D representation of interacting residues between GCP2 (At GCP2 residues that interact with TUBG1) (Chain C) and Orf3a (Chain A), Complex 9, provided by the LIGPLOT v.2.2 software. Olive Green lines represent hydrogen bonds, grey semi-circles denote hydrophobic interactions made by GCP2 and Pink semi-circles represent hydrophobic interactions made by the Orf3a.

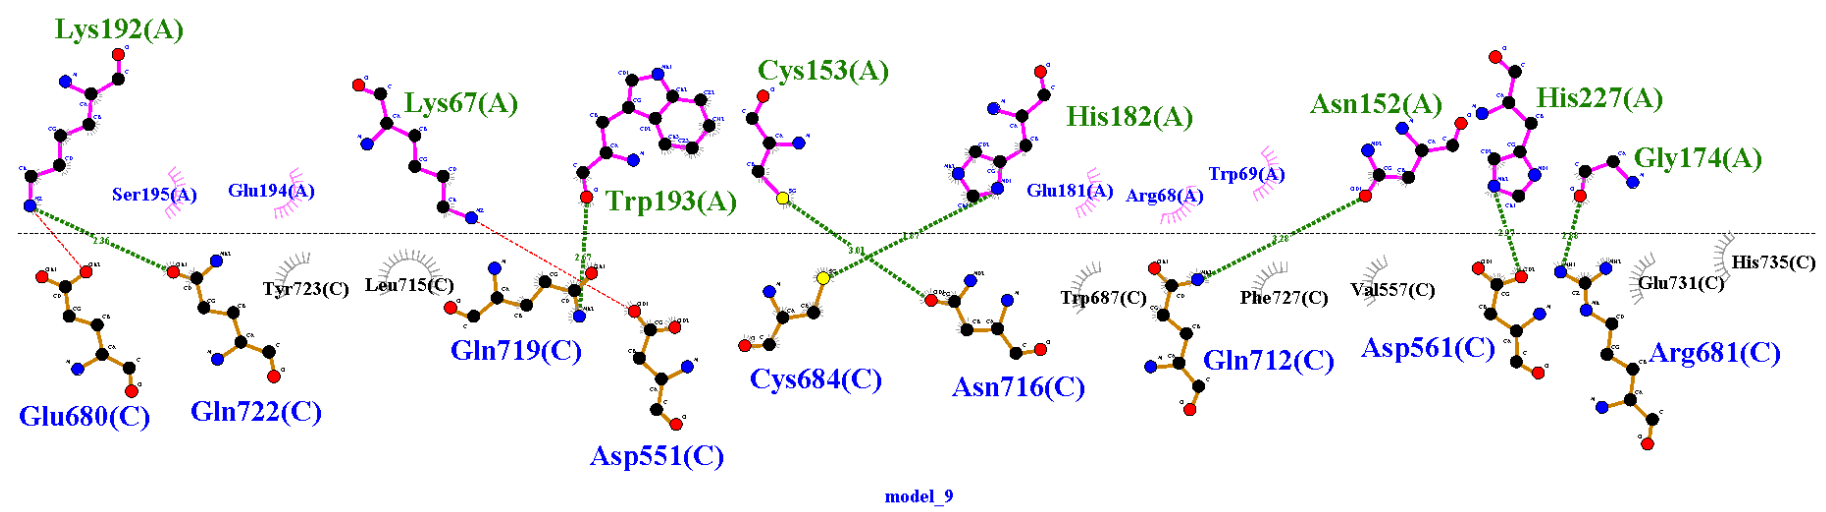

**Fig S44:** 2D representation of interacting residues between GCP3 ( At GCP3 residues that interact with TUBG1) (Chain B) and Orf3a (Chain A), Complex 1, provided by the LIGPLOT v.2.2 software. Olive Green lines represent hydrogen bonds, grey semi-circles denote hydrophobic interactions made by GCP3 and Pink semi-circles represent hydrophobic interactions made by the Orf3a.

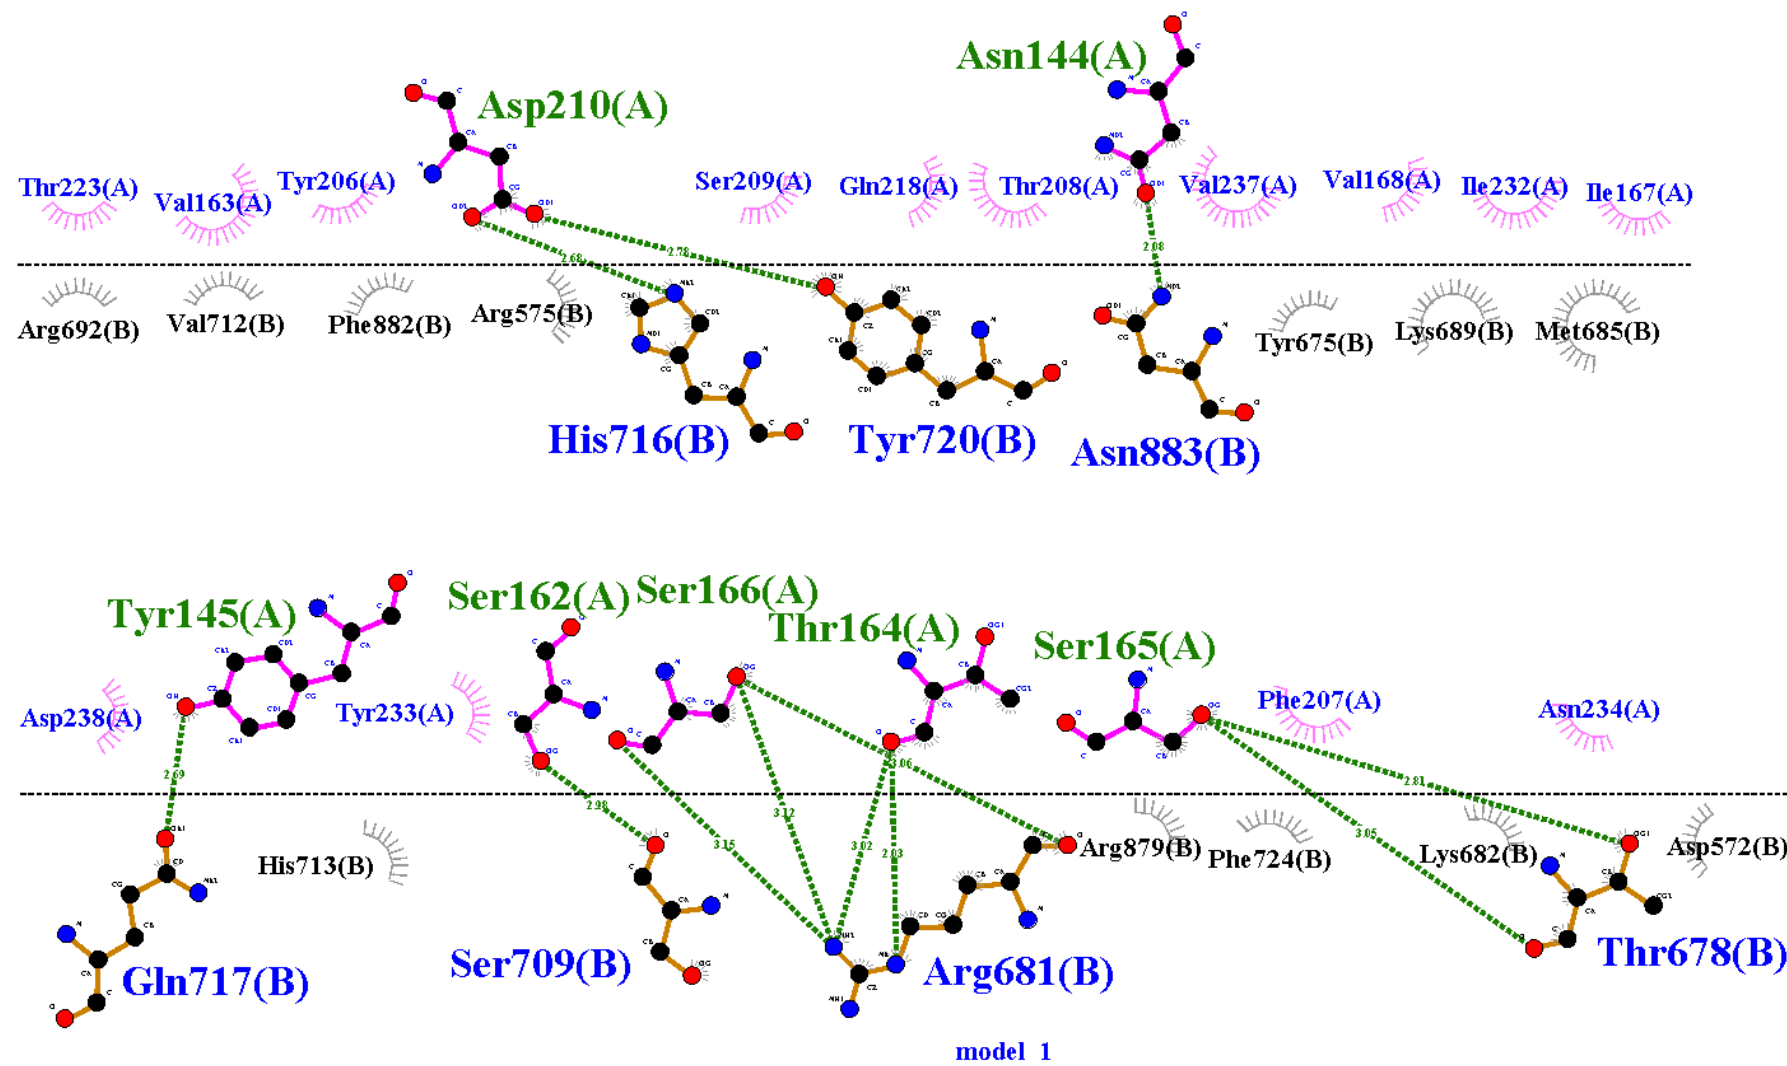

**Fig S45:** 2D representation of interacting residues between GCP3 ( At GCP3 residues that interact with TUBG1) (Chain B) and Orf3a (Chain A), Complex 3. provided by the LIGPLOT v.2.2 software. Olive Green lines represent hydrogen bonds, grey semi-circles denote hydrophobic interactions made by GCP3 and Pink semi-circles represent hydrophobic interactions made by the Orf3a.

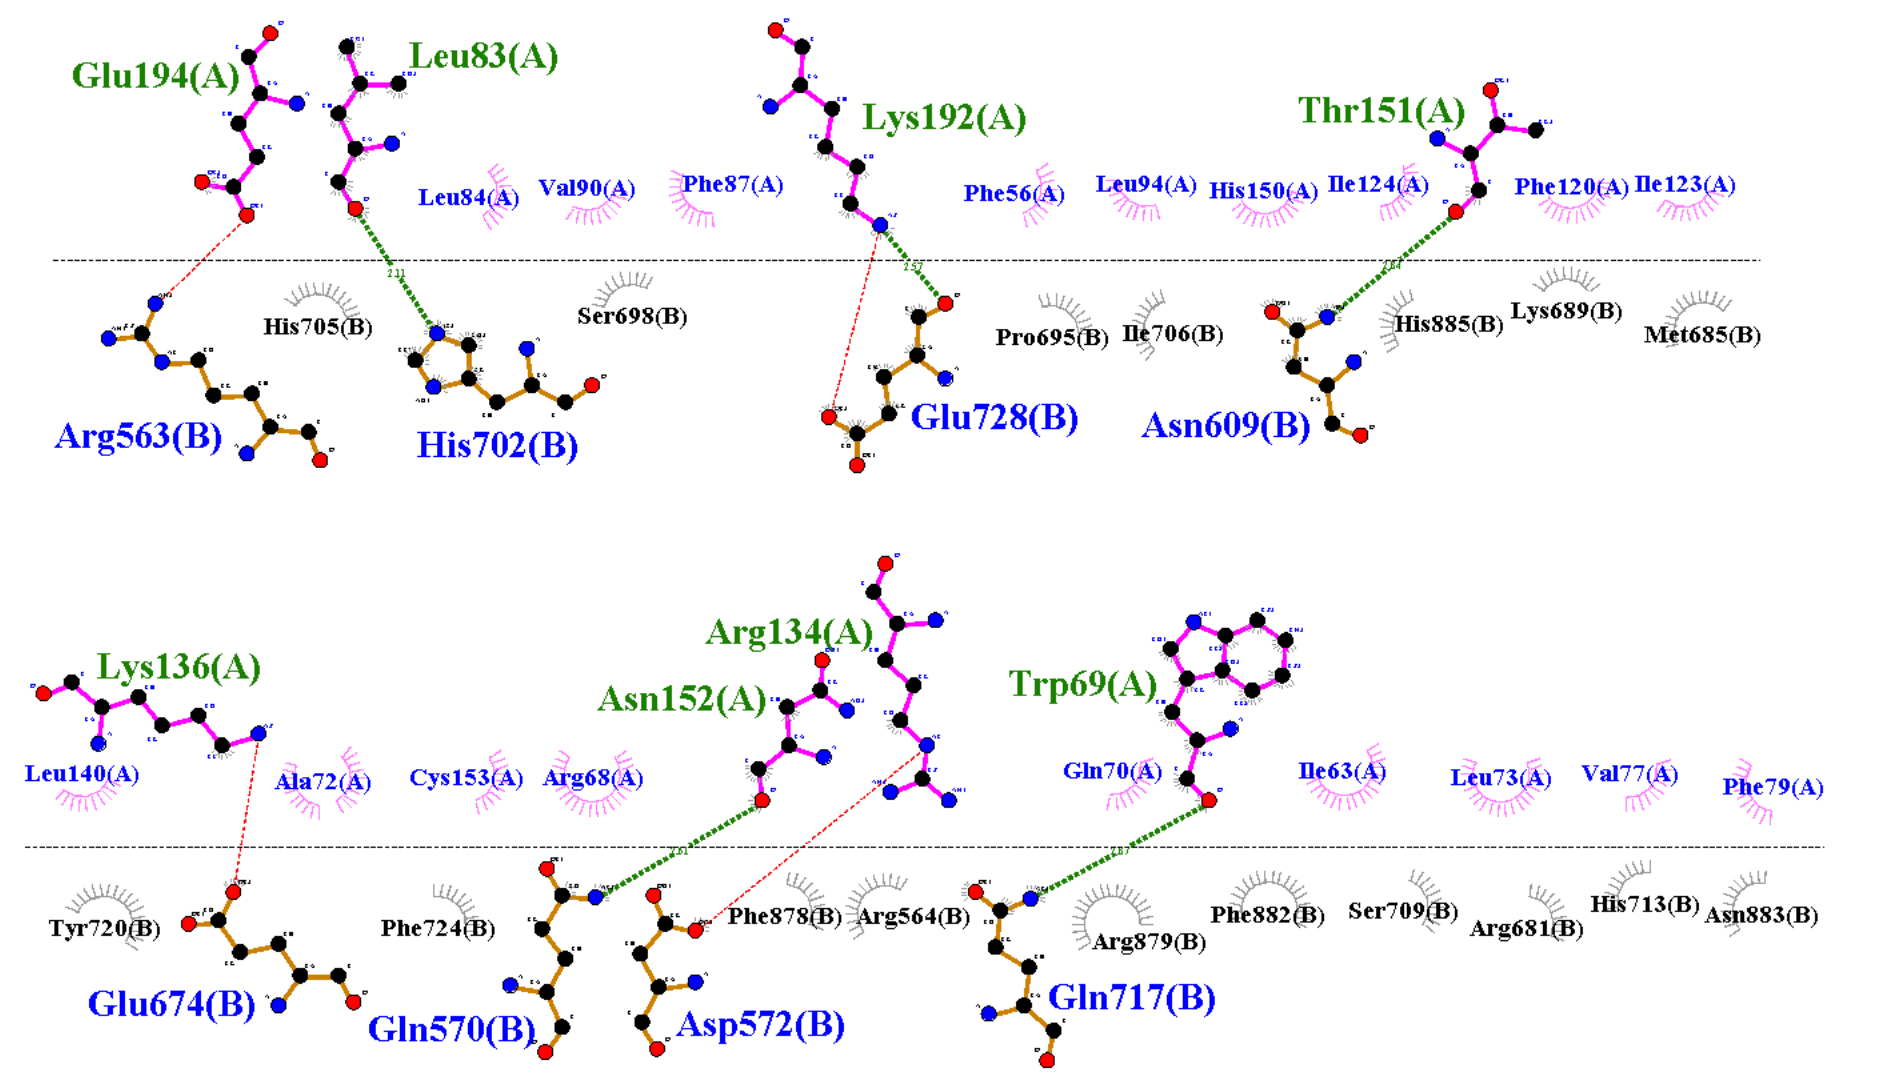

**Fig S46:** 2D representation of interacting residues between TUBG1 ( At TUBG1 residues that interact with GCP2 ) (Chain g) and M Protein (Chain A), Complex 1, provided by the LIGPLOT v.2.2 software. Olive Green lines represent hydrogen bonds, grey semi-circles denote hydrophobic interactions made by TUBG1 and Pink semi-circles represent hydrophobic interactions made by the M Protein.

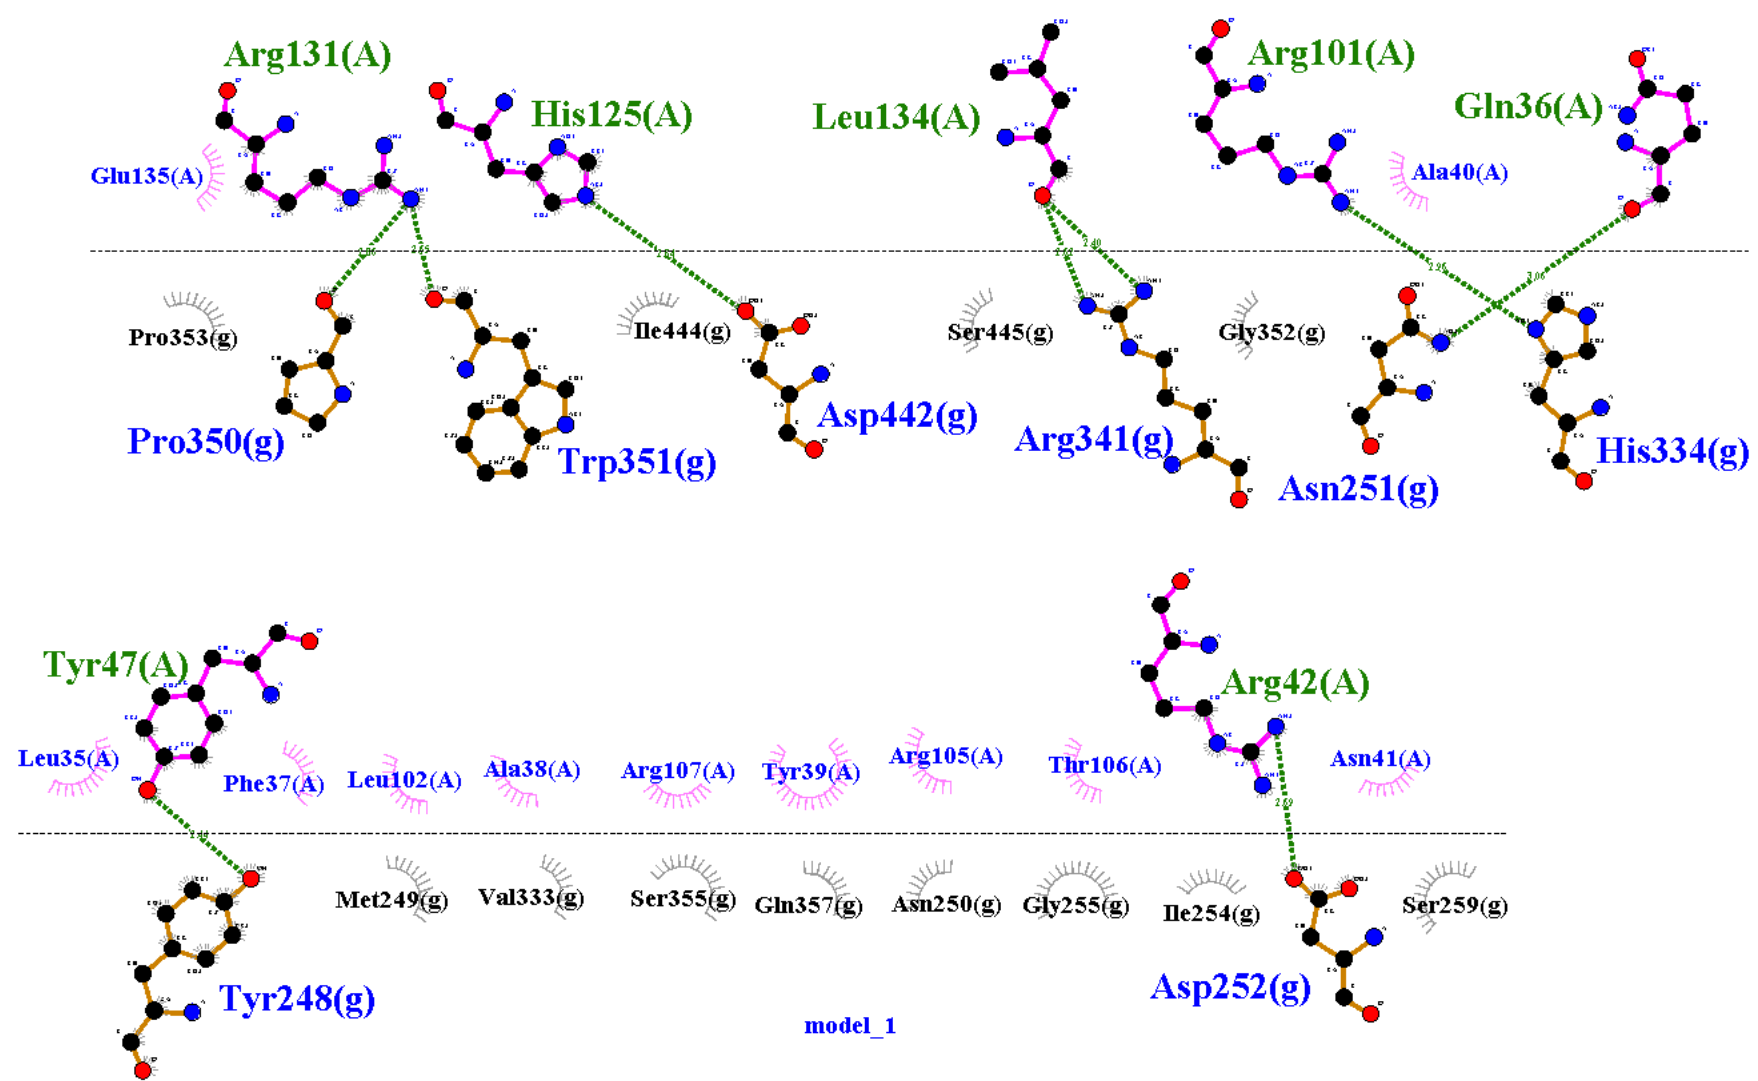

**Fig S47:** 2D representation of interacting residues between TUBG1 ( At TUBG1 residues that interact with GCP2 ) (Chain g) and M Protein (Chain A), Complex 7, provided by the LIGPLOT v.2.2 software. Olive Green lines represent hydrogen bonds, grey semi-circles denote hydrophobic interactions made by TUBG1 and Pink semi-circles represent hydrophobic interactions made by the M Protein.

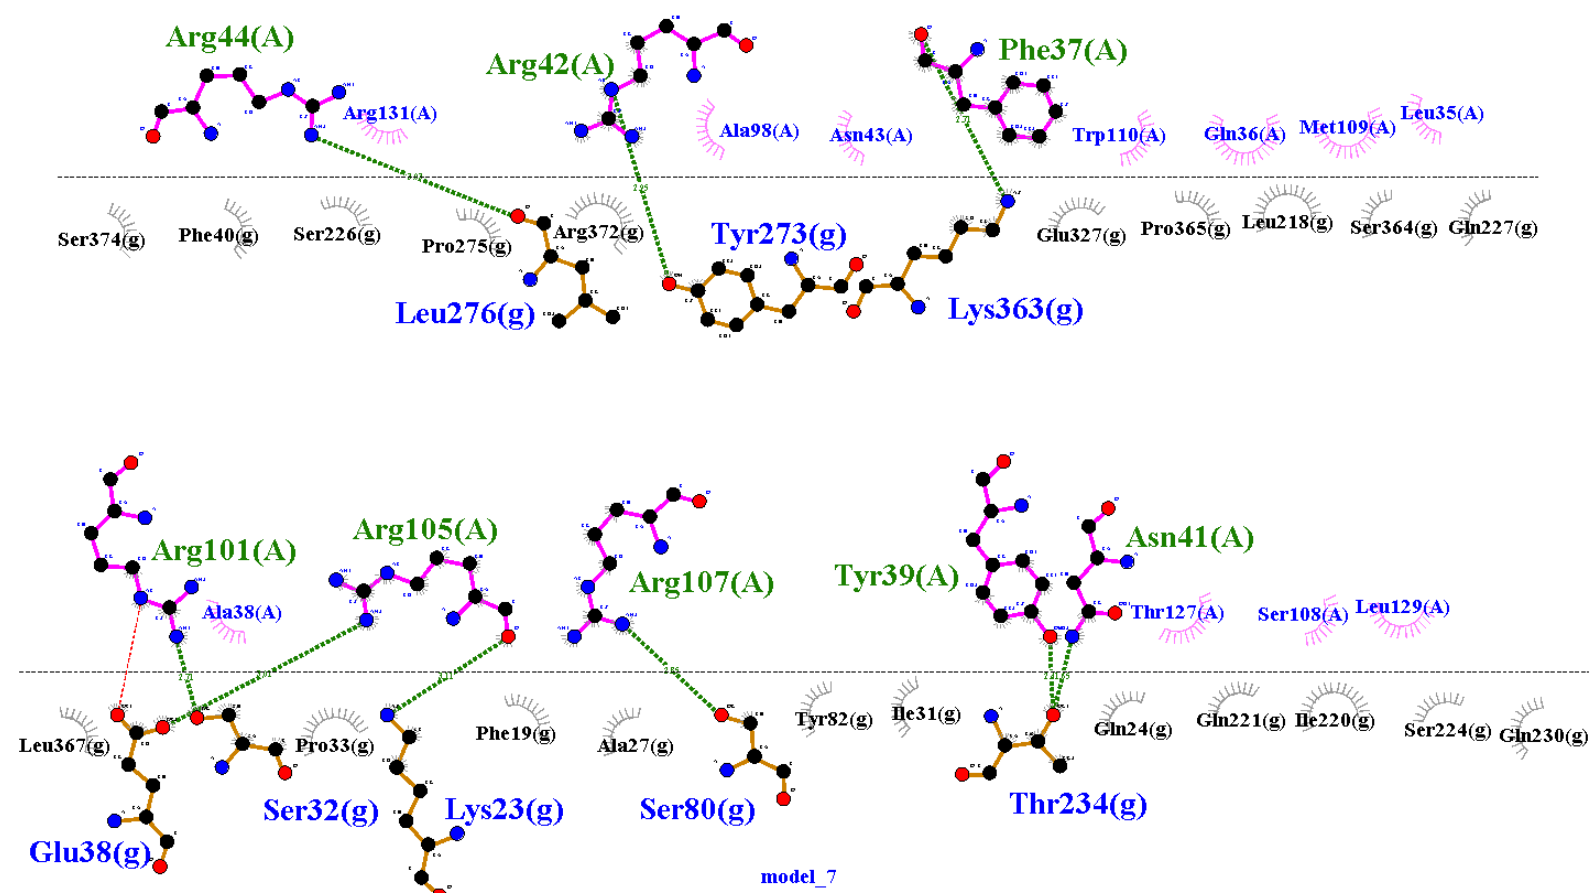

**Fig S48:** 2D representation of interacting residues between TUBG1 ( At TUBG1 residues that interact with GCP2 ) (Chain g) and M Protein (Chain A), Complex 8, provided by the LIGPLOT v.2.2 software. Olive Green lines represent hydrogen bonds, grey semi-circles denote hydrophobic interactions made by TUBG1 and Pink semi-circles represent hydrophobic interactions made by the M Protein.

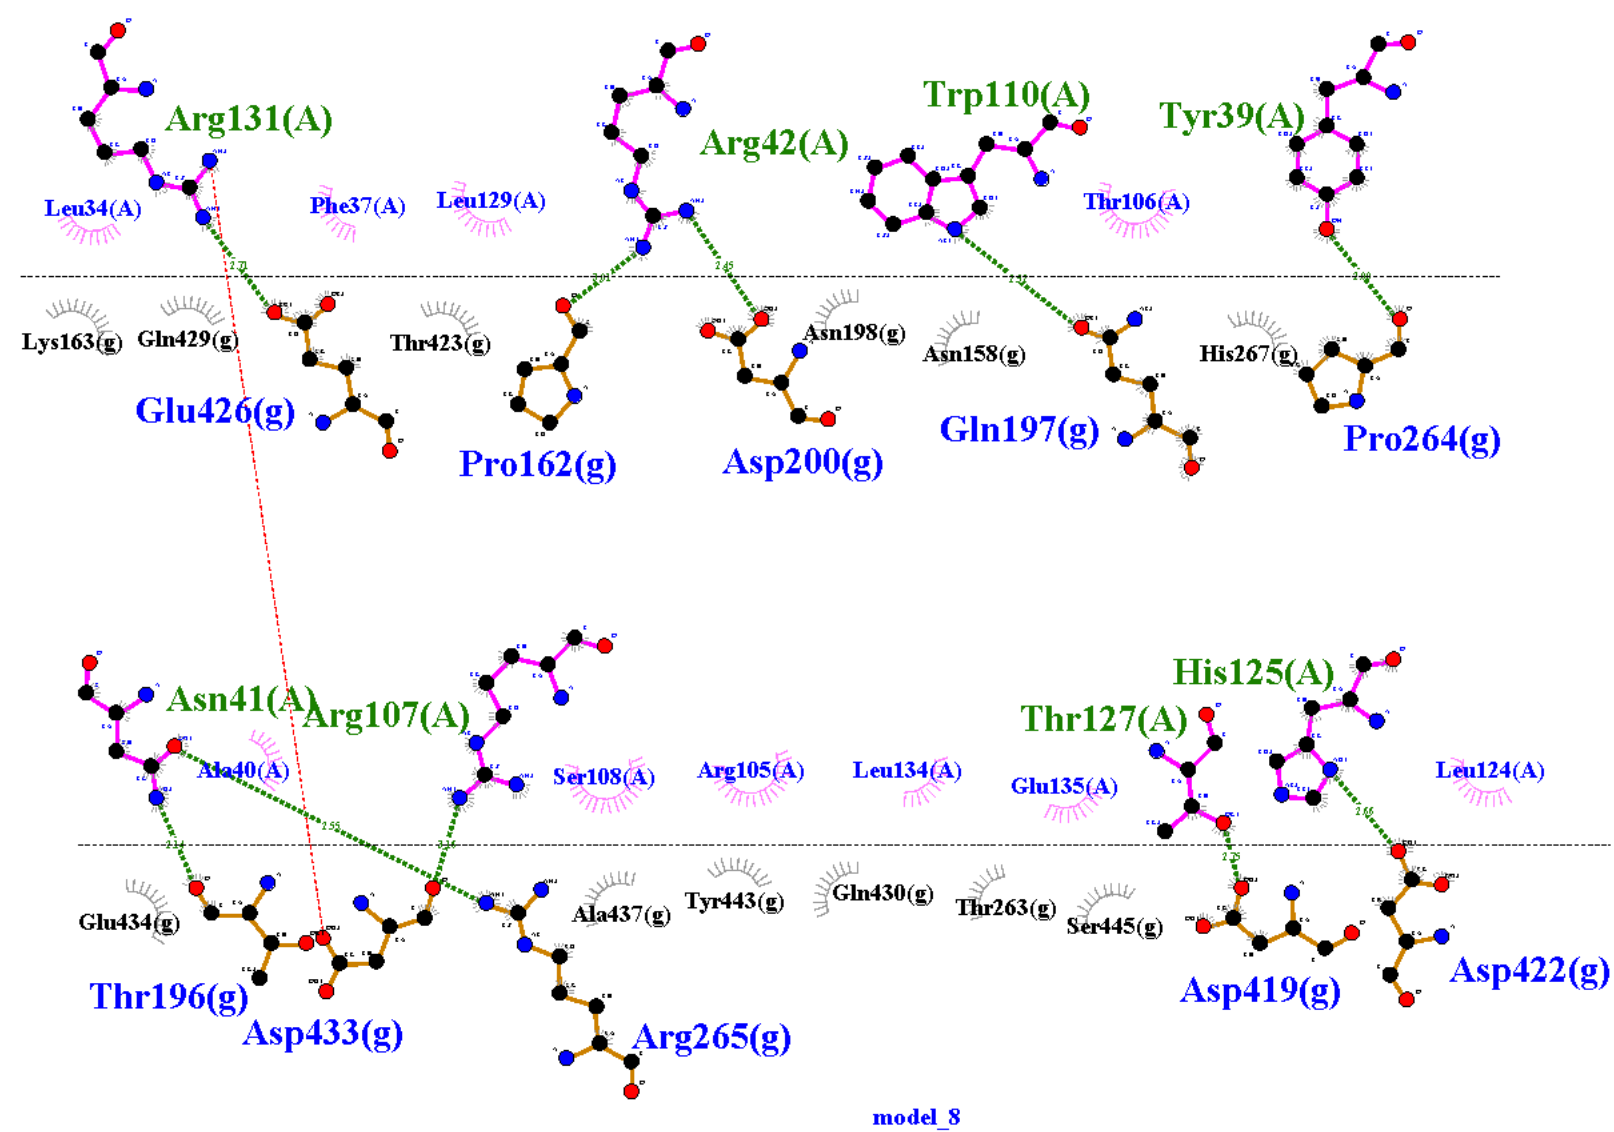



**Fig S49:** 2D representation of interacting residues between TUBG1 ( At TUBG1 residues that interact with GCP3 ) (Chain g) and M Protein (Chain A), Complex 1, provided by the LIGPLOT v.2.2 software. Olive Green lines represent hydrogen bonds, grey semi-circles denote hydrophobic interactions made by TUBG1 and Pink semi-circles represent hydrophobic interactions made by the M Protein.

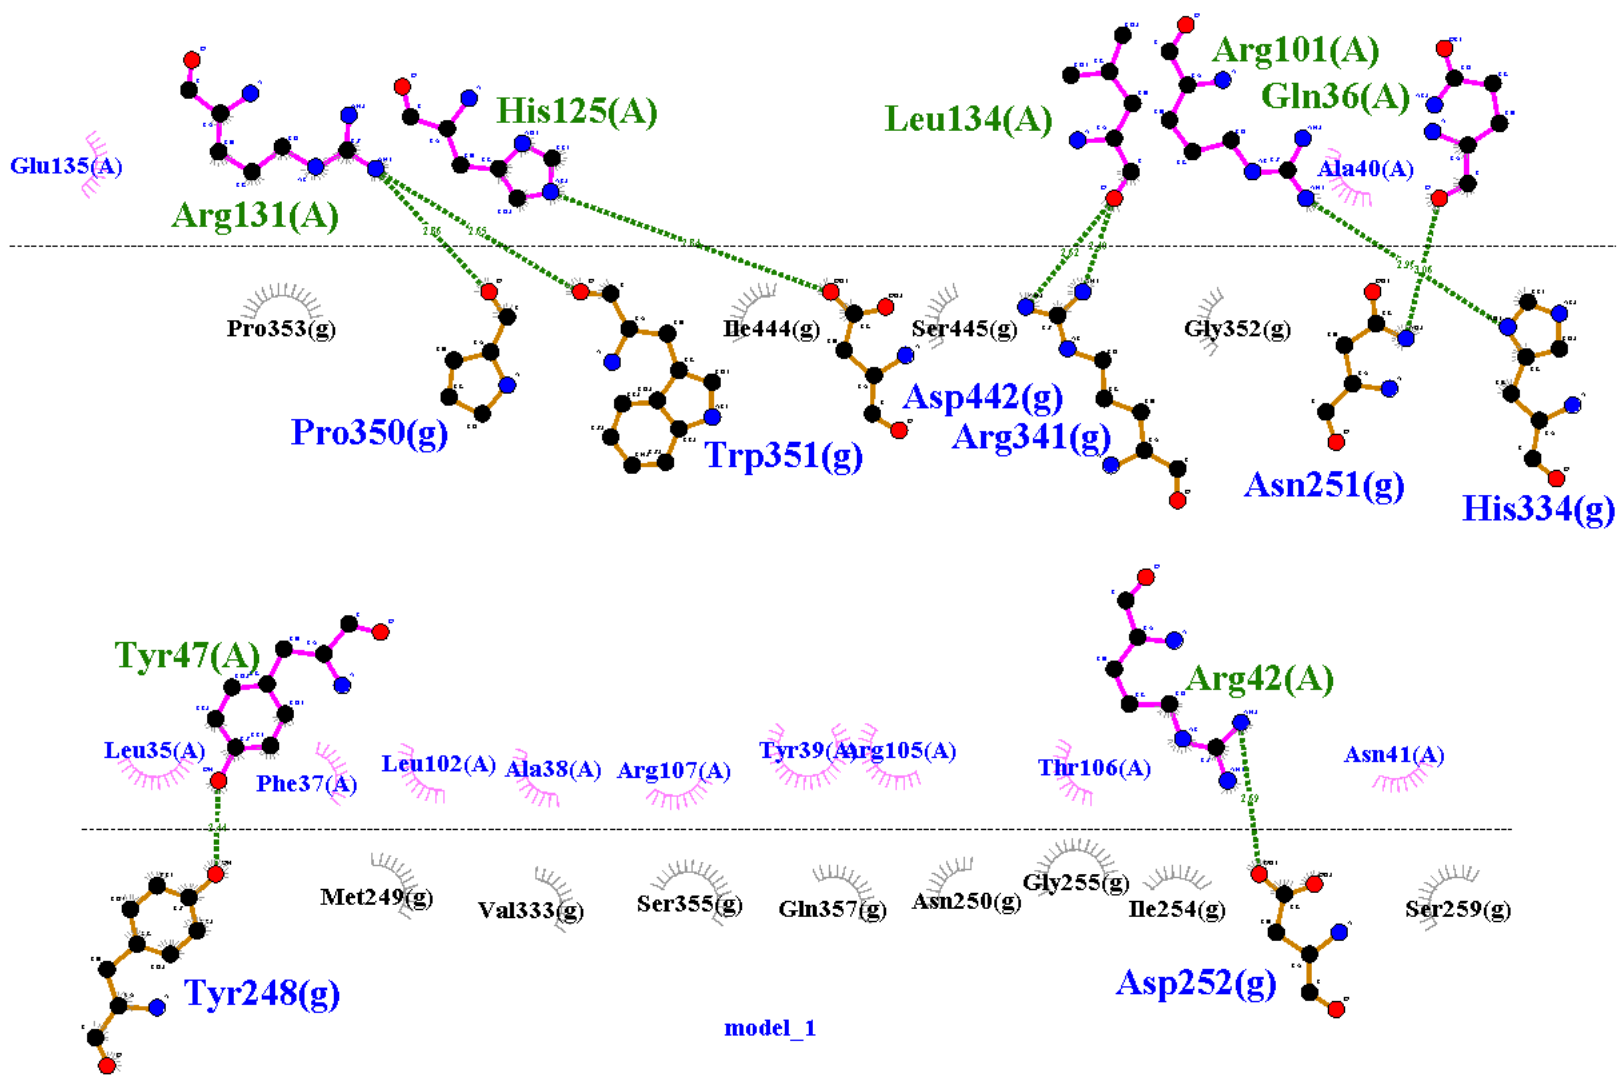

**Fig S50:** 2D representation of interacting residues between TUBG1 ( At TUBG1 residues that interact with GCP3 ) (Chain g) and M Protein (Chain A), Complex 8, provided by the LIGPLOT v.2.2 software. Olive Green lines represent hydrogen bonds, grey semi-circles denote hydrophobic interactions made by TUBG1 and Pink semi-circles represent hydrophobic interactions made by the M Protein.

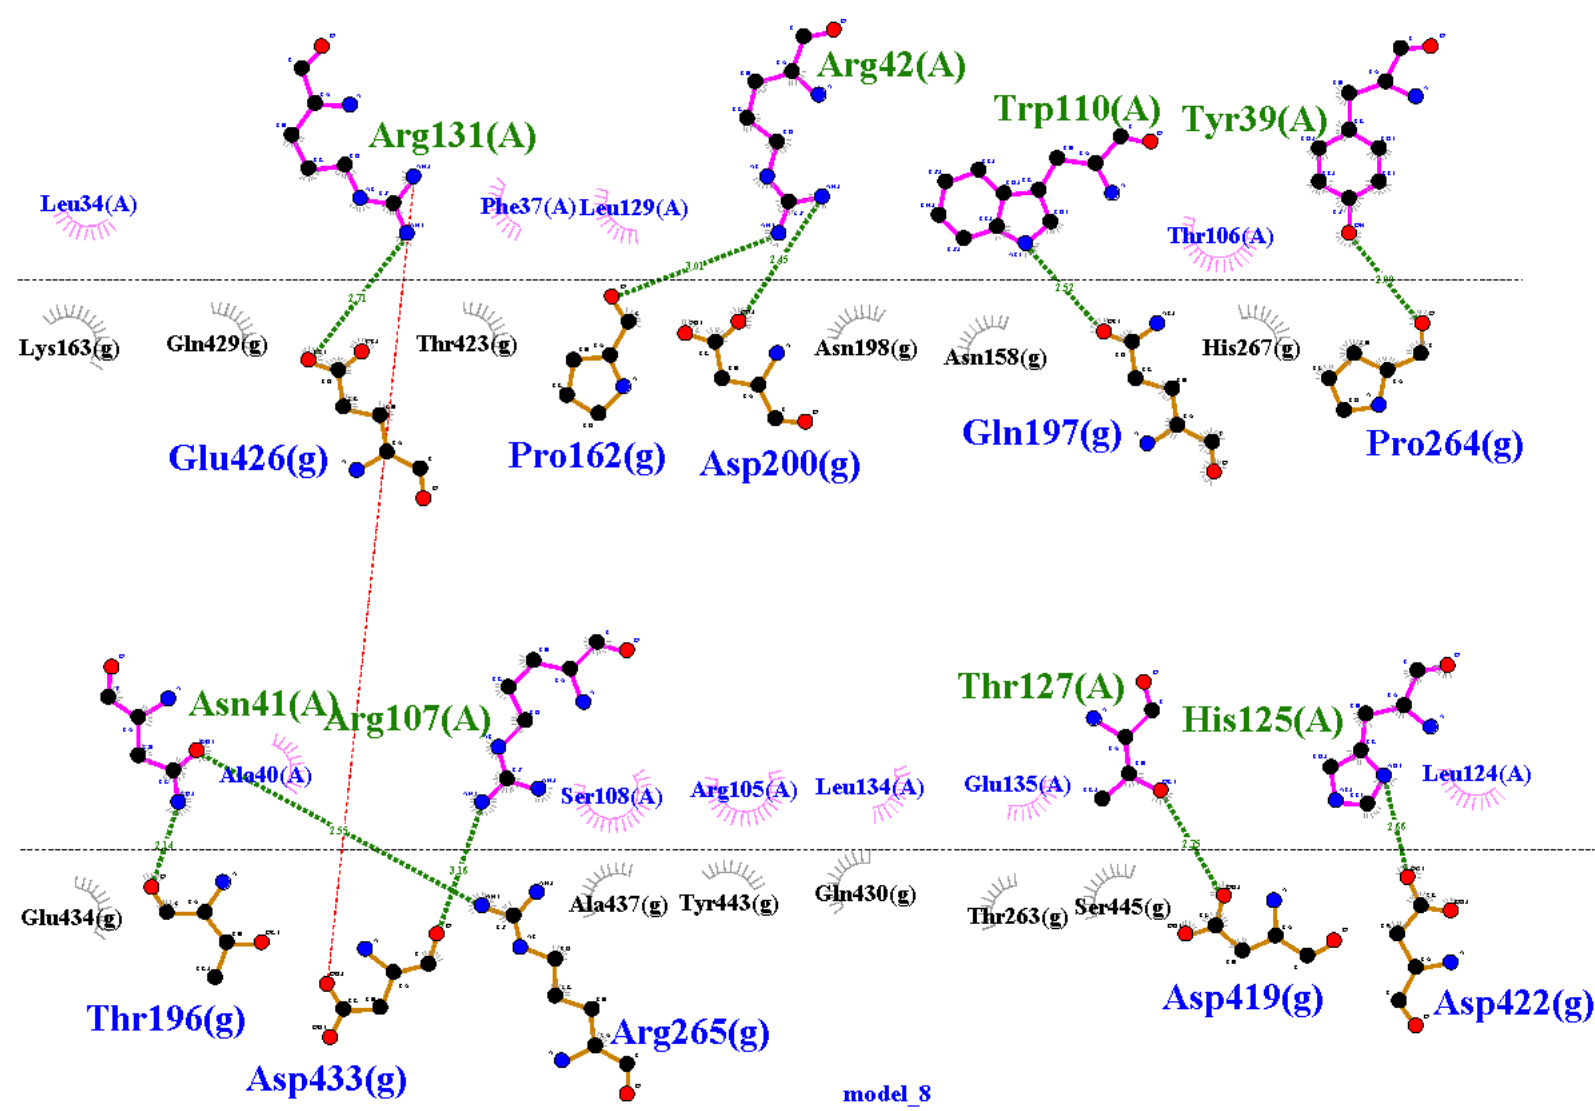

**Fig S51:** 2D representation of interacting residues between TUBG1 ( At TUBG1 residues that interact with GCP3 ) (Chain g) and M Protein (Chain A), Complex 9,provided by the LIGPLOT v.2.2 software. Olive Green lines represent hydrogen bonds, grey semi-circles denote hydrophobic interactions made by TUBG1 and Pink semi-circles represent hydrophobic interactions made by the M Protein.

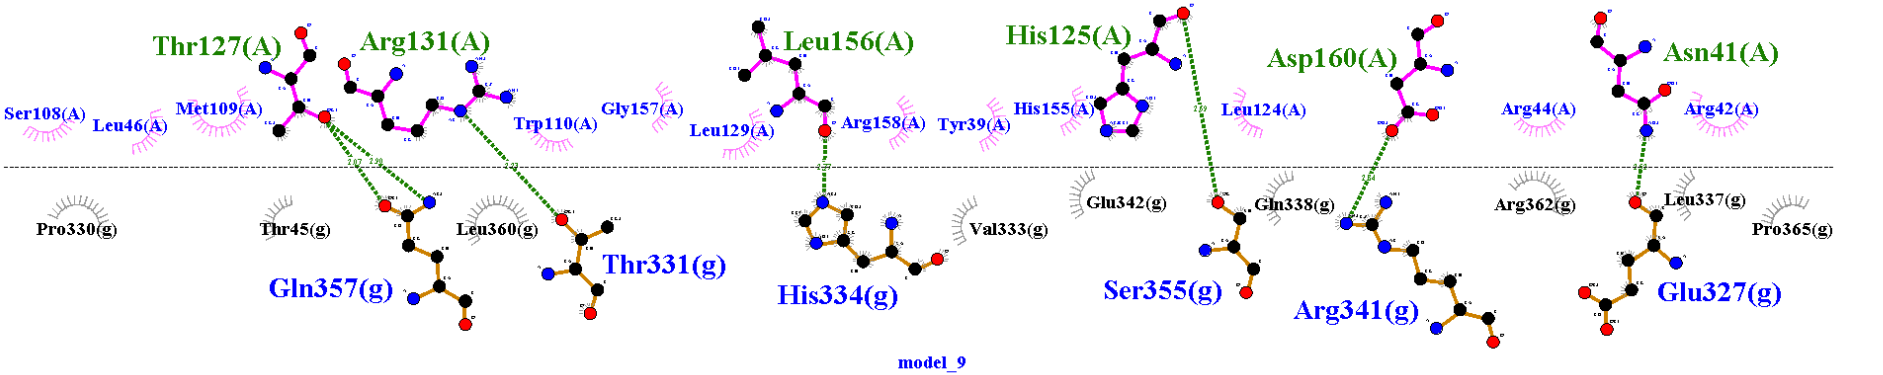

**Fig S52:** 2D representation of interacting residues between TUBG1 ( At TUBG1 residues that interact with GCP2 ) (Chain g) and orf3a (Chain A), Complex 3 provided by the LIGPLOT v.2.2 software. Olive Green lines represent hydrogen bonds, grey semi-circles denote hydrophobic interactions made by TUBG1 and Pink semi-circles represent hydrophobic interactions made by the orf3a.

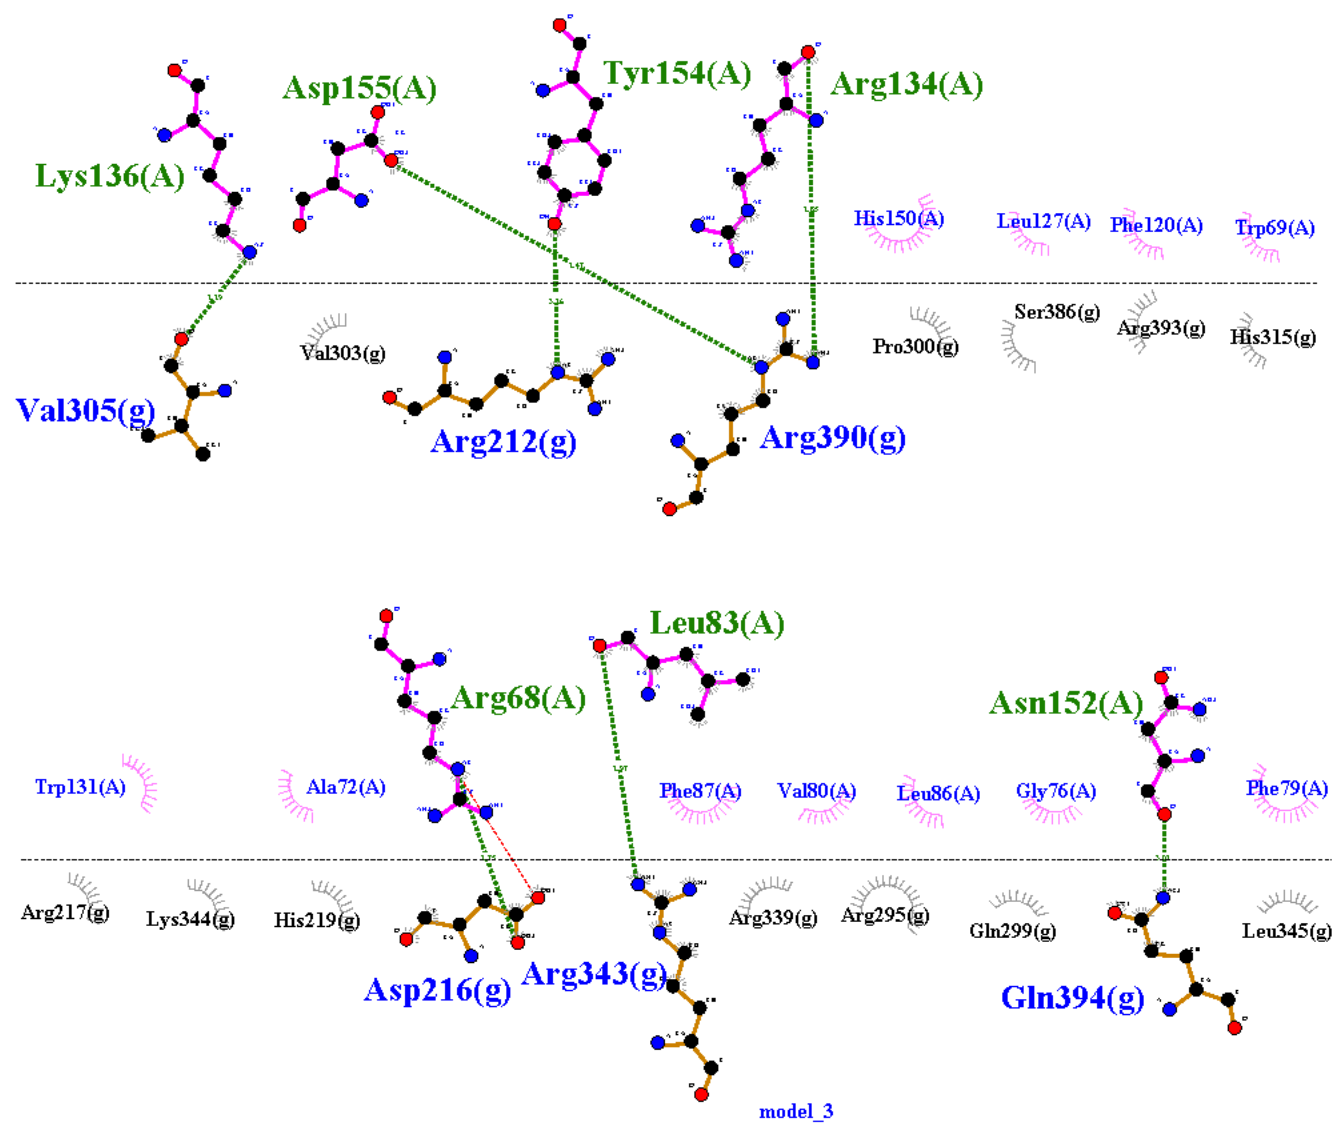

**Fig S53:** 2D representation of interacting residues between TUBG1 ( At TUBG1 residues that interact with GCP2 ) (Chain g) and orf3a (Chain A), Complex 1,provided by the LIGPLOT v.2.2 software. Olive Green lines represent hydrogen bonds, grey semi-circles denote hydrophobic interactions made by TUBG1 and Pink semi-circles represent hydrophobic interactions made by the orf3a.

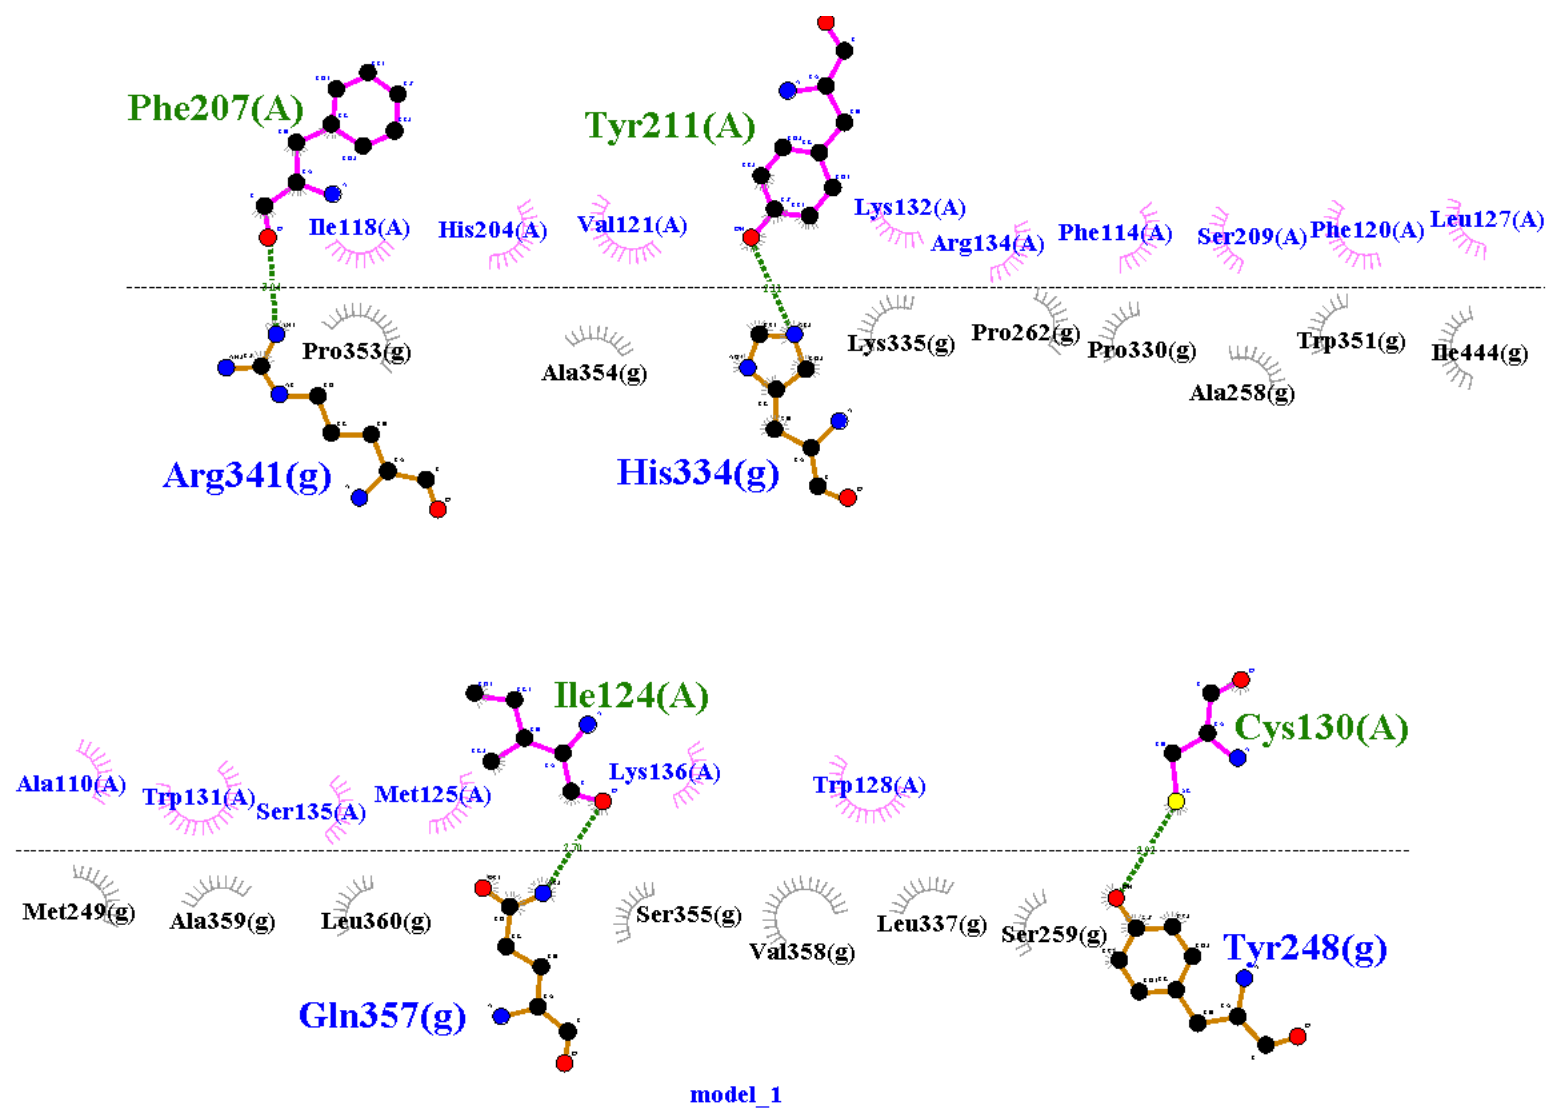

**Fig S54:** 2D representation of interacting residues between TUBG1 ( At TUBG1 residues that interact with GCP3 ) (Chain g) and orf3a (Chain A), Complex 1,provided by the LIGPLOT v.2.2 software. Olive Green lines represent hydrogen bonds, grey semi-circles denote hydrophobic interactions made by TUBG1 and Pink semi-circles represent hydrophobic interactions made by the orf3a.

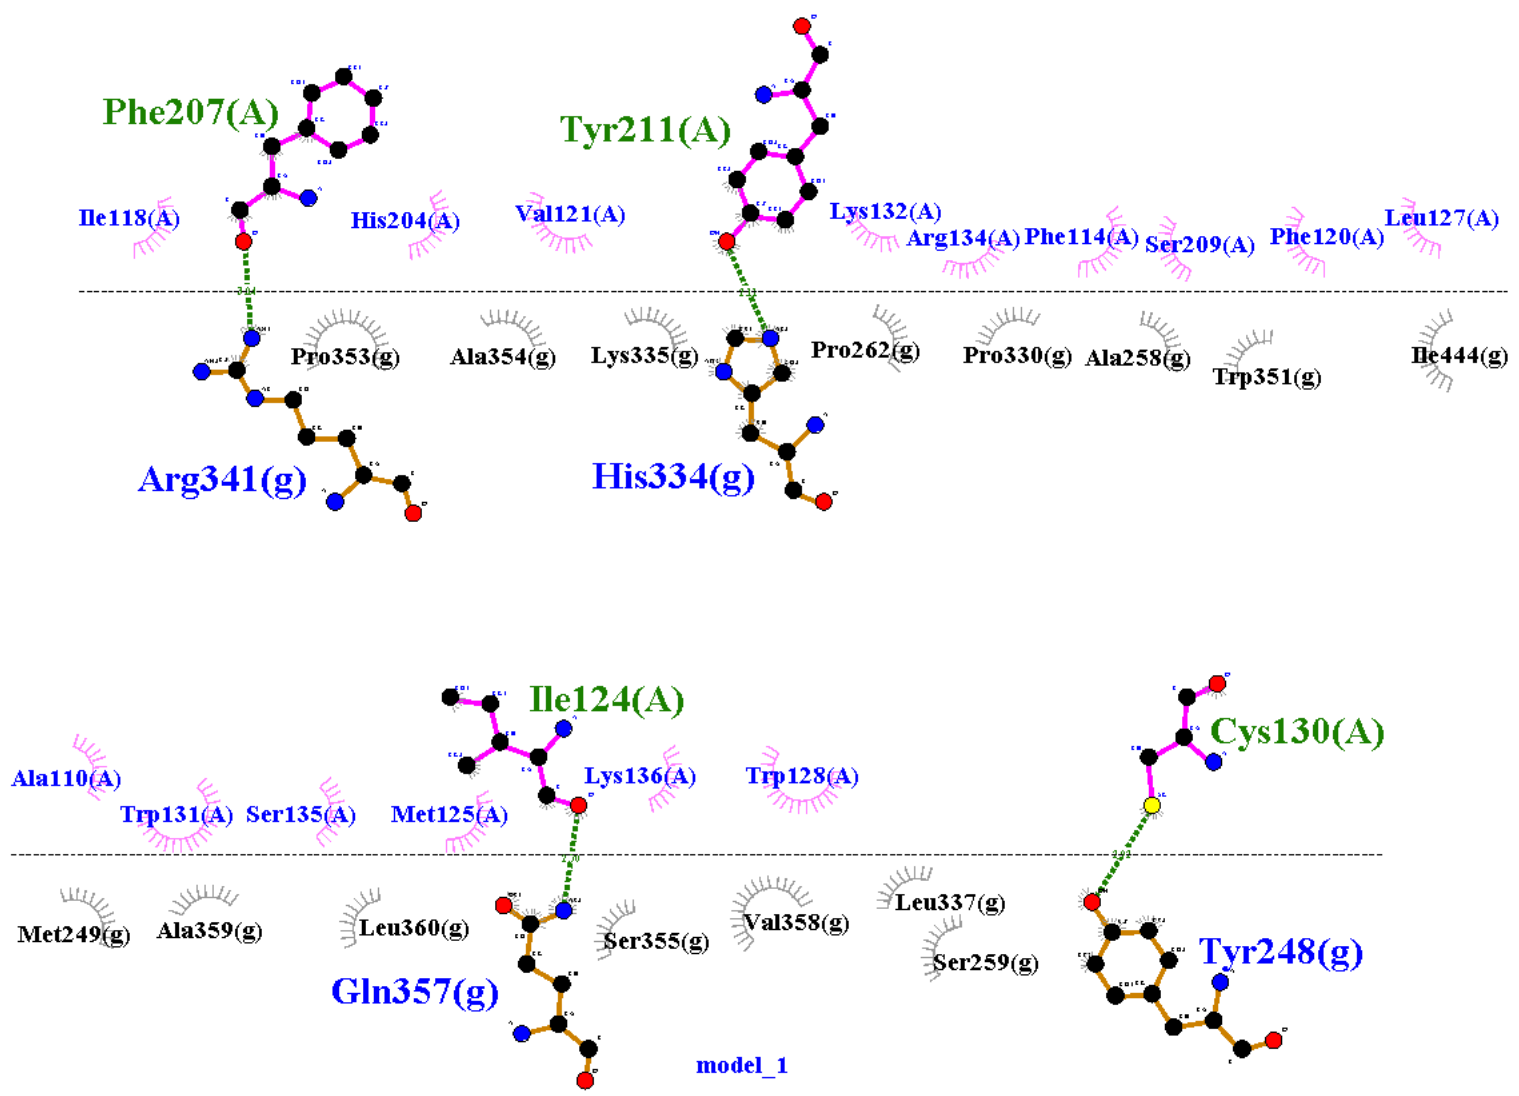

**Fig S55:** 2D representation of interacting residues between TUBG1 ( At TUBG1 residues that interact with GCP3 ) (Chain g) and orf3a (Chain A), Complex 3,provided by the LIGPLOT v.2.2 software. Olive Green lines represent hydrogen bonds, grey semi-circles denote hydrophobic interactions made by TUBG1 and Pink semi-circles represent hydrophobic interactions made by the orf3a.

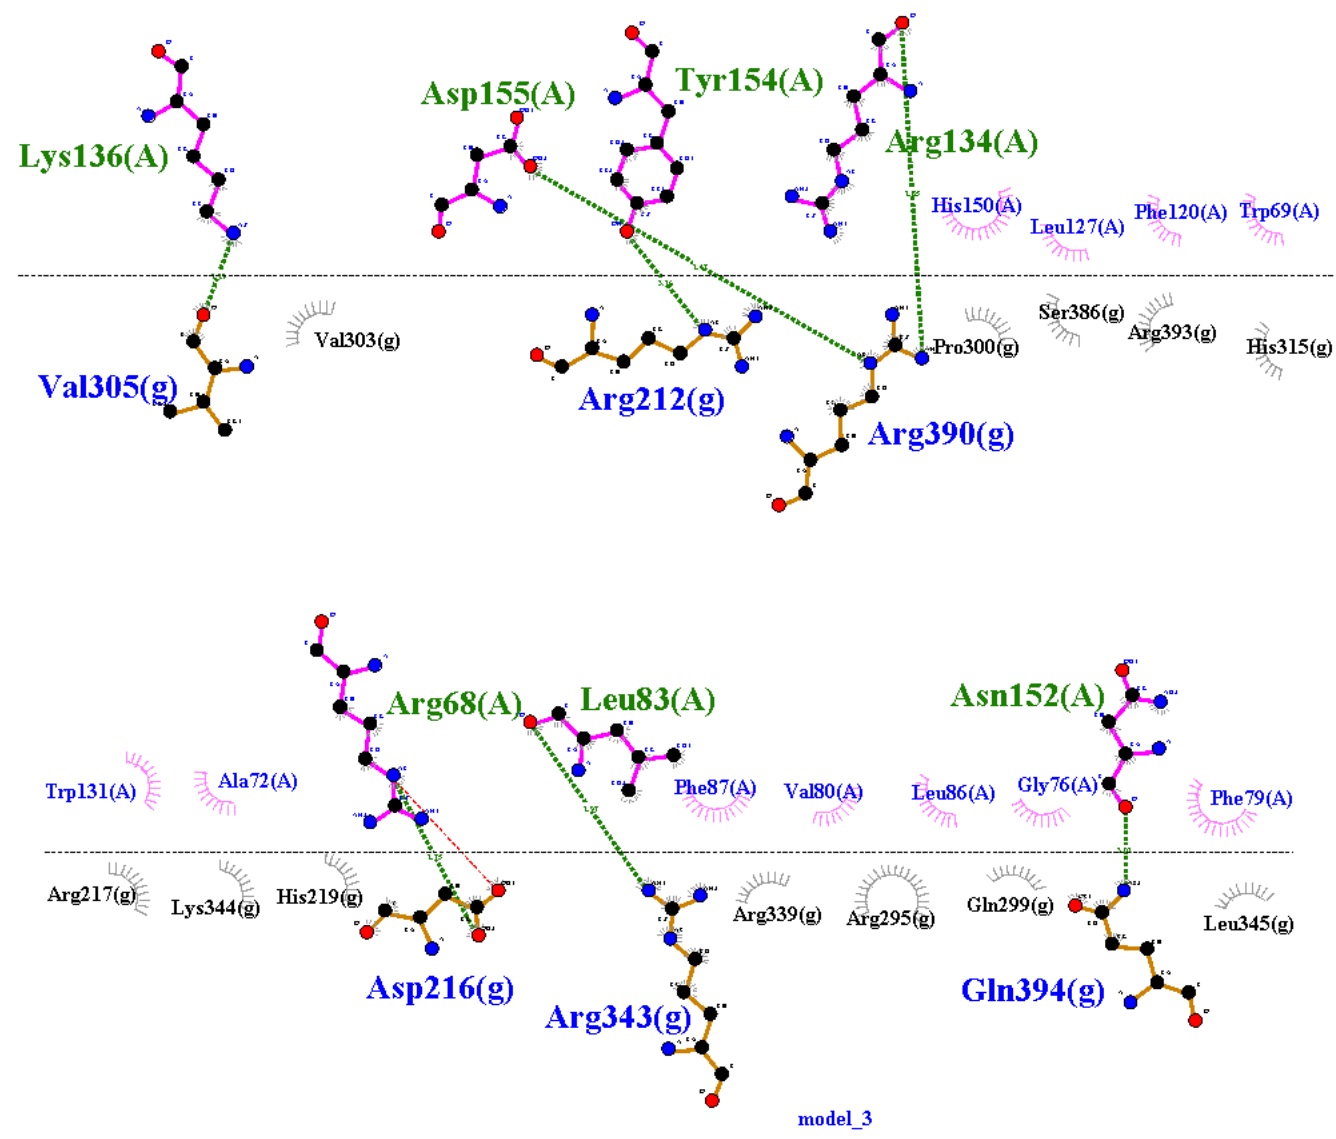

**Fig S56:** 2D representation of interacting residues between LMP-1 (Chain Y) and **3CLpro/Mpro** (Chain A) complex 1, provided by the LIGPLOT v.2.2 software. Olive Green lines represent hydrogen bonds, grey semi-circles denote hydrophobic interactions made by **3CLpro/Mpro** and Pink semi-circles represent hydrophobic interactions made by the LMP1.

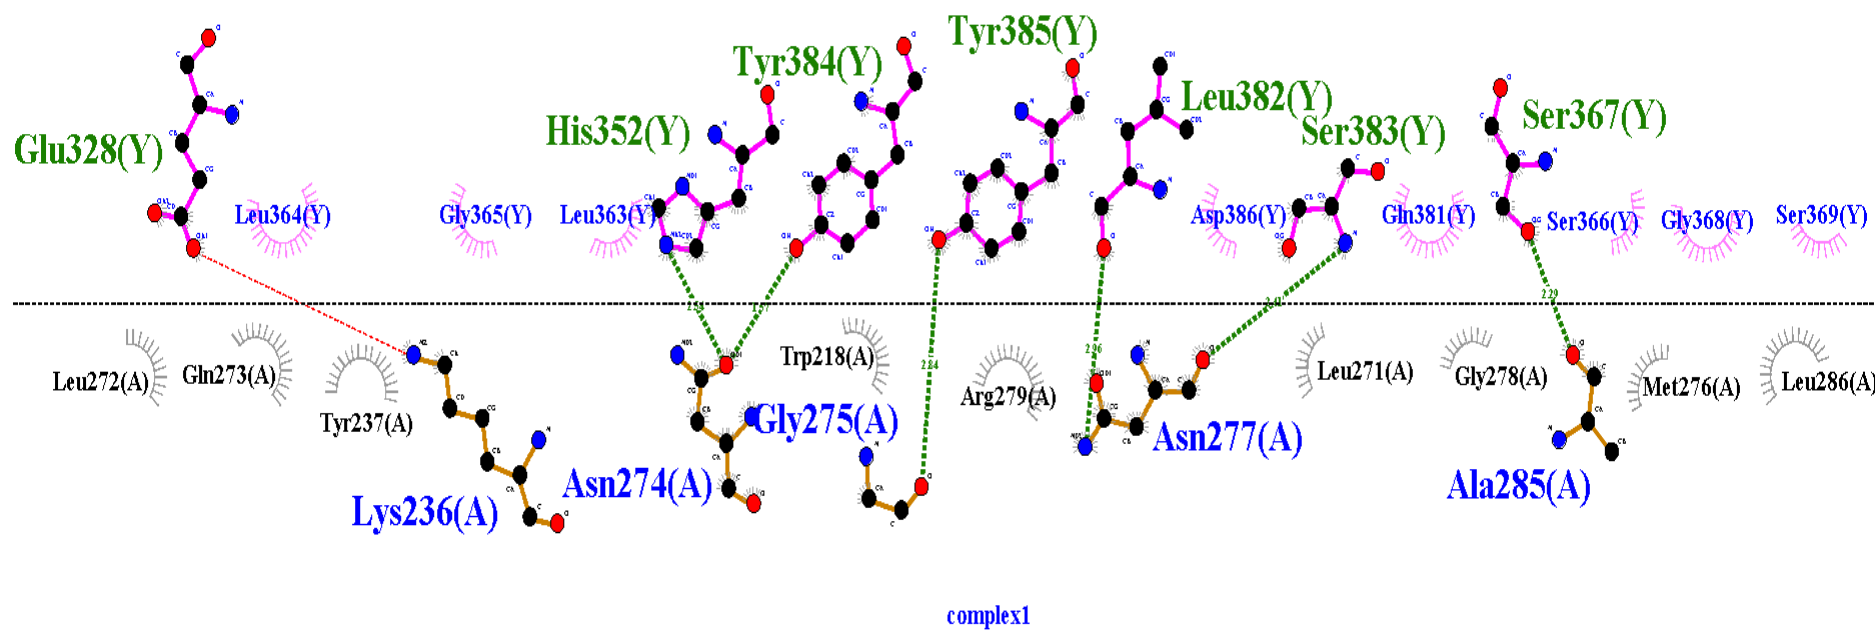



**Fig S57:** 2D representation of interacting residues between LMP-1 (Chain Y) and **3CLpro/Mpro** (Chain A) complex 9, provided by the LIGPLOT v.2.2 software. Olive Green lines represent hydrogen bonds, grey semi-circles denote hydrophobic interactions made by **3CLpro/Mpro** and Pink semi-circles represent hydrophobic interactions made by the LMP1.

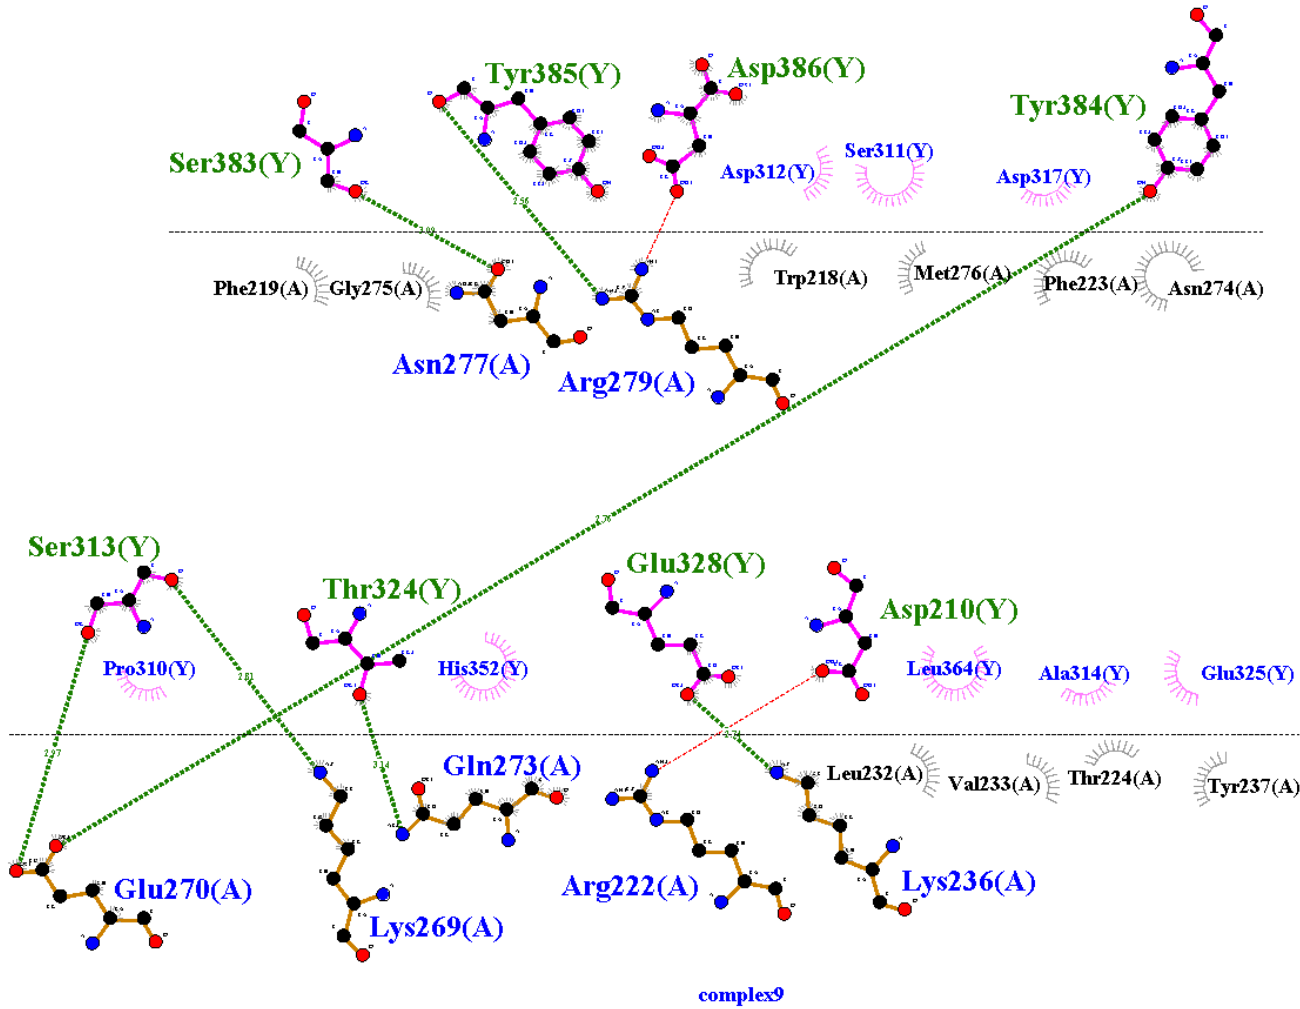

**Fig S58:** 2D representation of interacting residues between LMP-1 (Chain Y) and **3CLpro/Mpro** (Chain A) complex 10, provided by the LIGPLOT v.2.2 software. Olive Green lines represent hydrogen bonds, grey semi-circles denote hydrophobic interactions made by **3CLpro/Mpro** and Pink semi-circles represent hydrophobic interactions made by the LMP1.

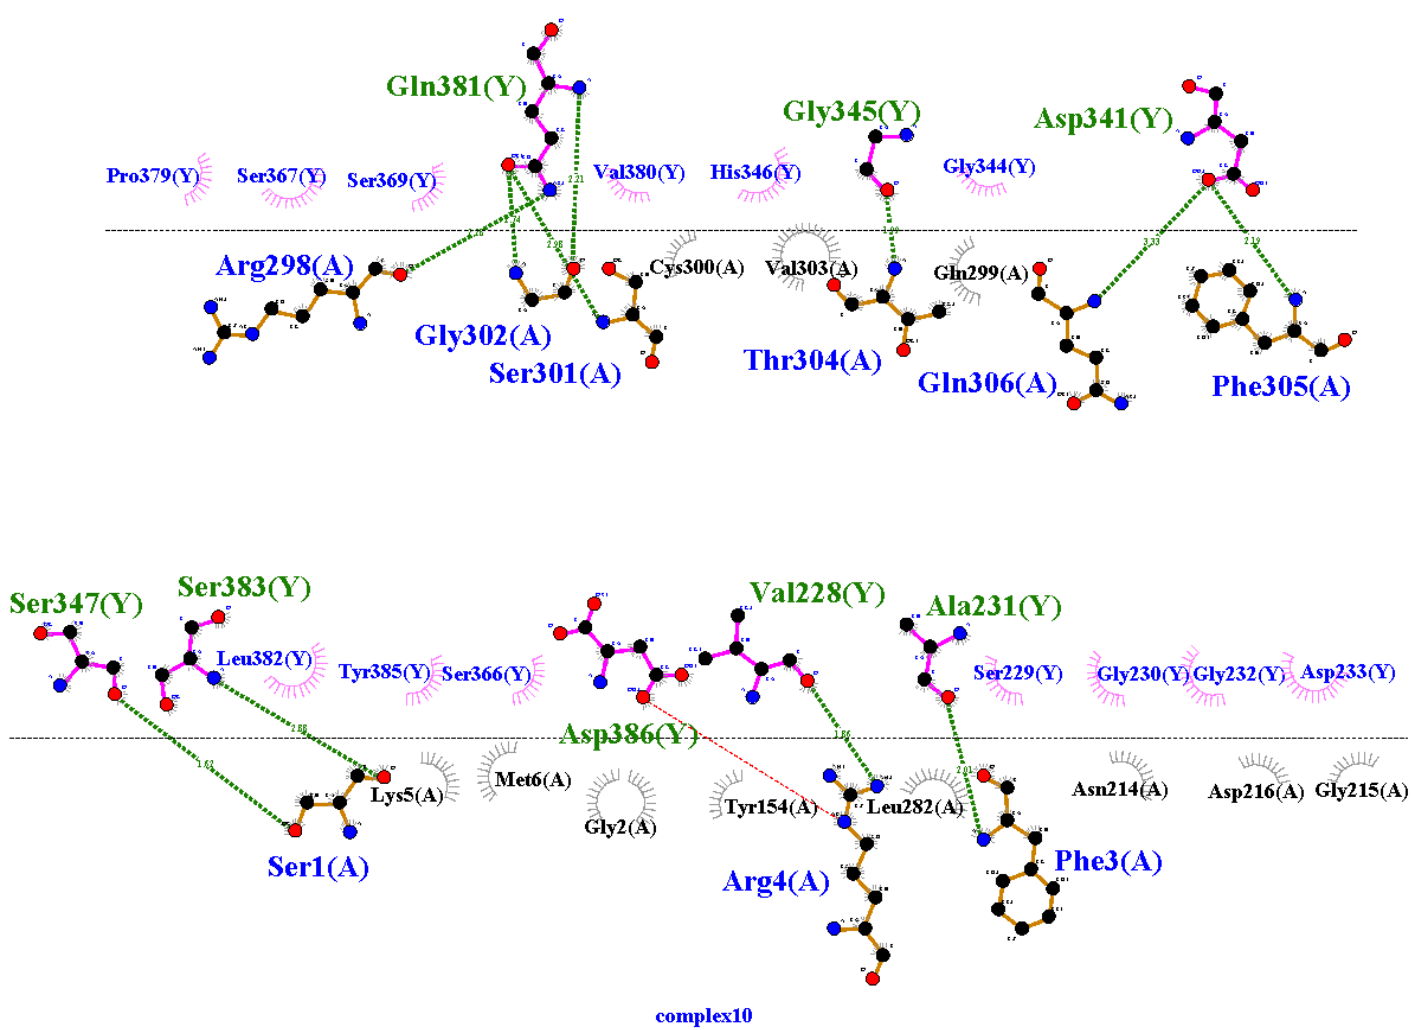

**Fig S59:** 2D representation of interacting residues between LMP-1 (Chain Y) and nsp7 (Chain A) complex 6, provided by the LIGPLOT v.2.2 software. Olive Green lines represent hydrogen bonds, grey semi-circles denote hydrophobic interactions made by LPM1 and Pink semi-circles represent hydrophobic interactions made by the nsp7.

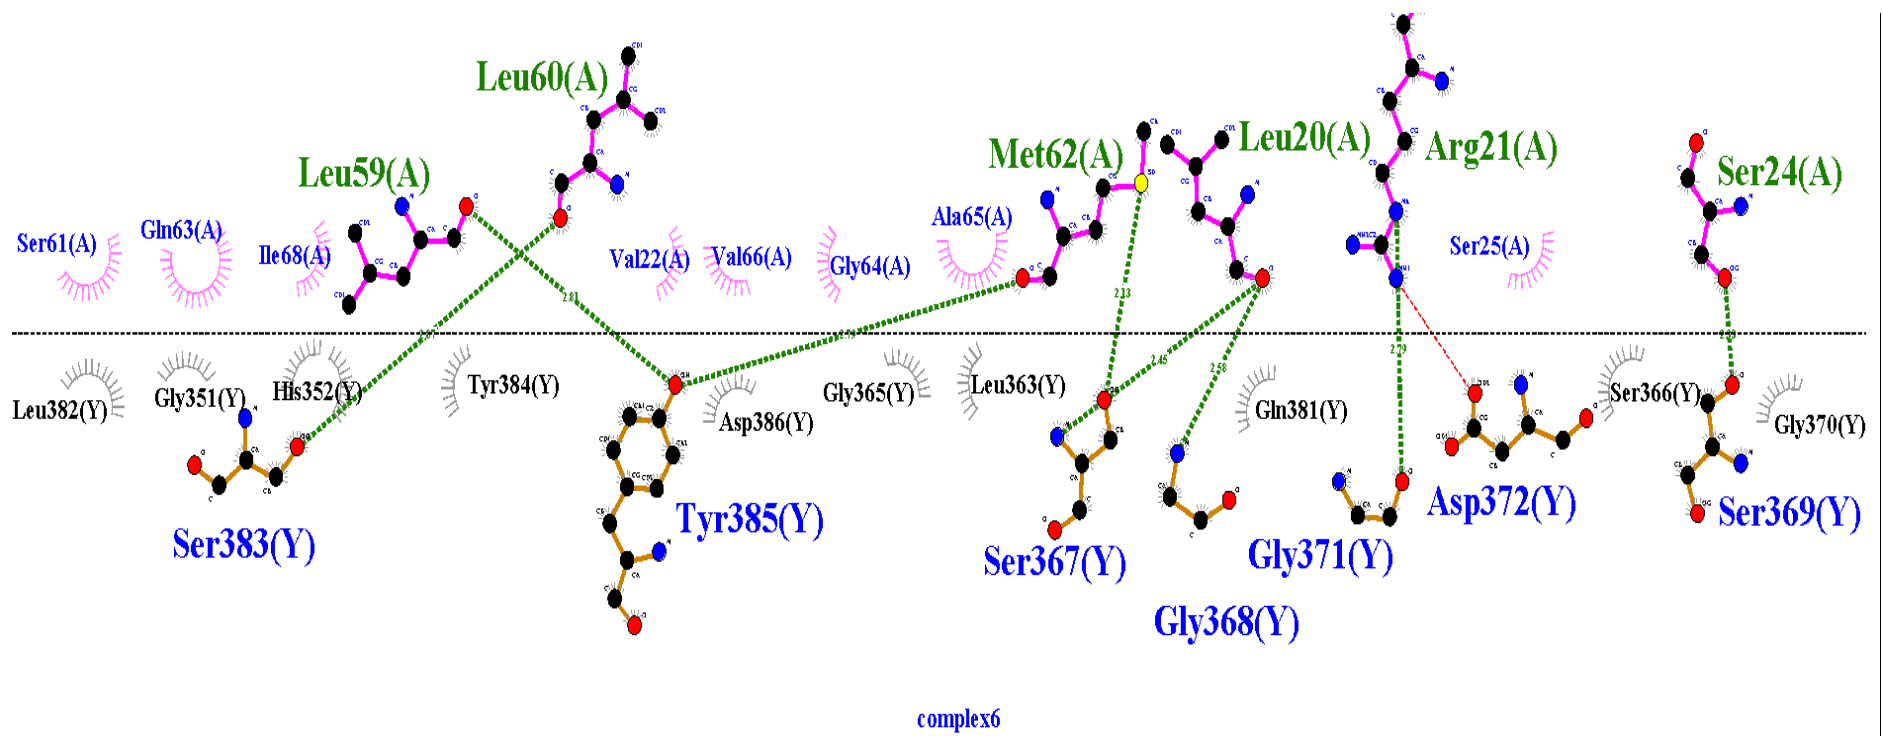

**Fig S60:** 2D representation of interacting residues between LMP-1 (Chain Y) and nsp7 (Chain A) complex 7, provided by the LIGPLOT v.2.2 software. Olive Green lines represent hydrogen bonds, grey semi-circles denote hydrophobic interactions made by LPM1 and Pink semi-circles represent hydrophobic interactions made by the nsp7.

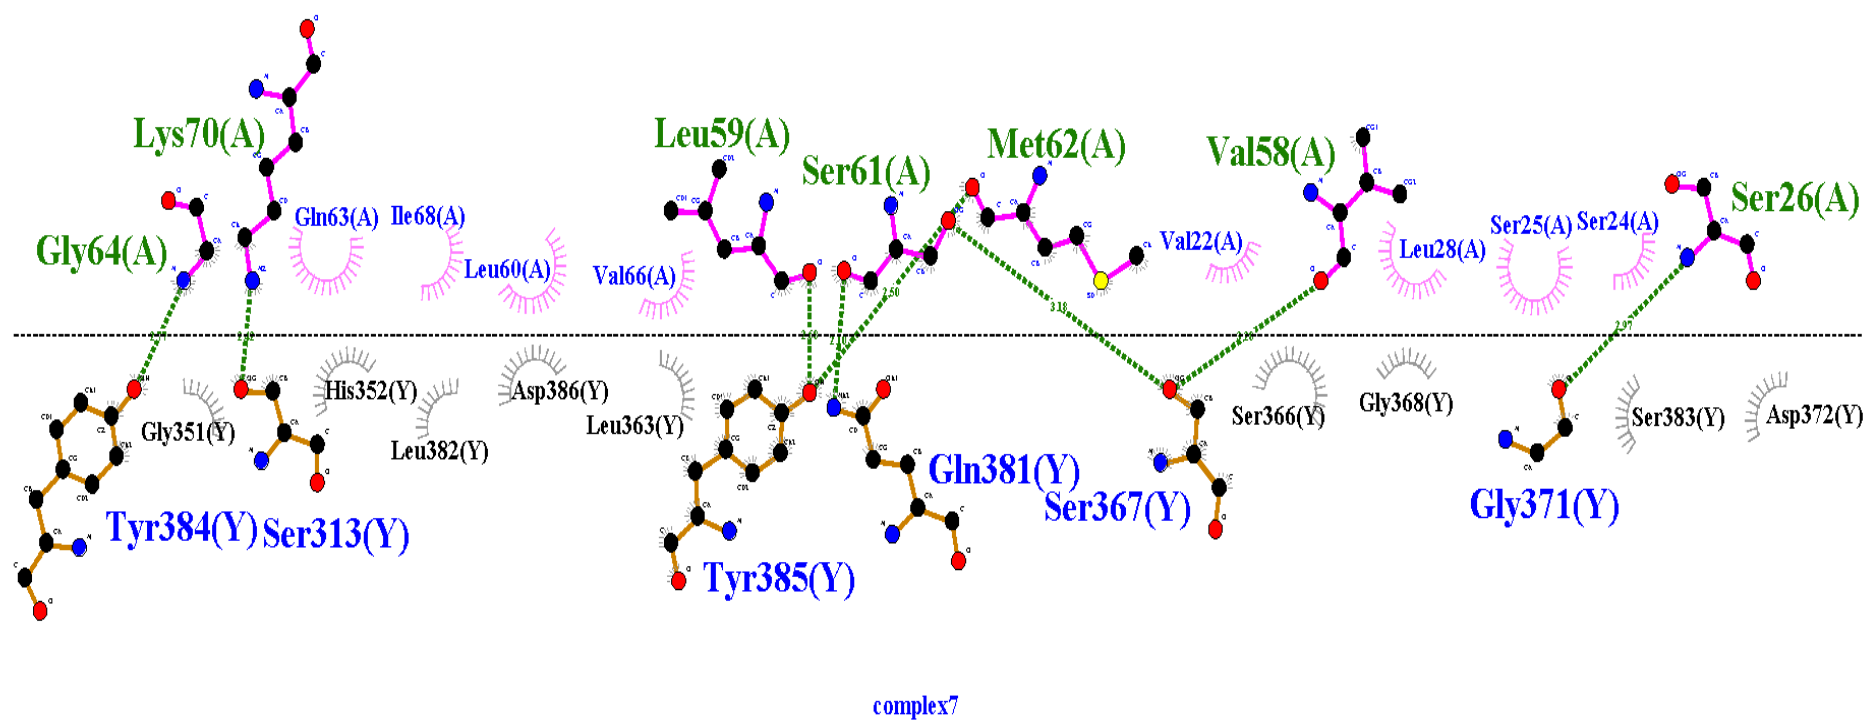

**Fig S61:** 2D representation of interacting residues between LMP-1 (Chain Y) and nsp7 (Chain A) complex 8, provided by the LIGPLOT v.2.2 software. Olive Green lines represent hydrogen bonds, grey semi-circles denote hydrophobic interactions made by LPM1 and Pink semi-circles represent hydrophobic interactions made by the nsp7.

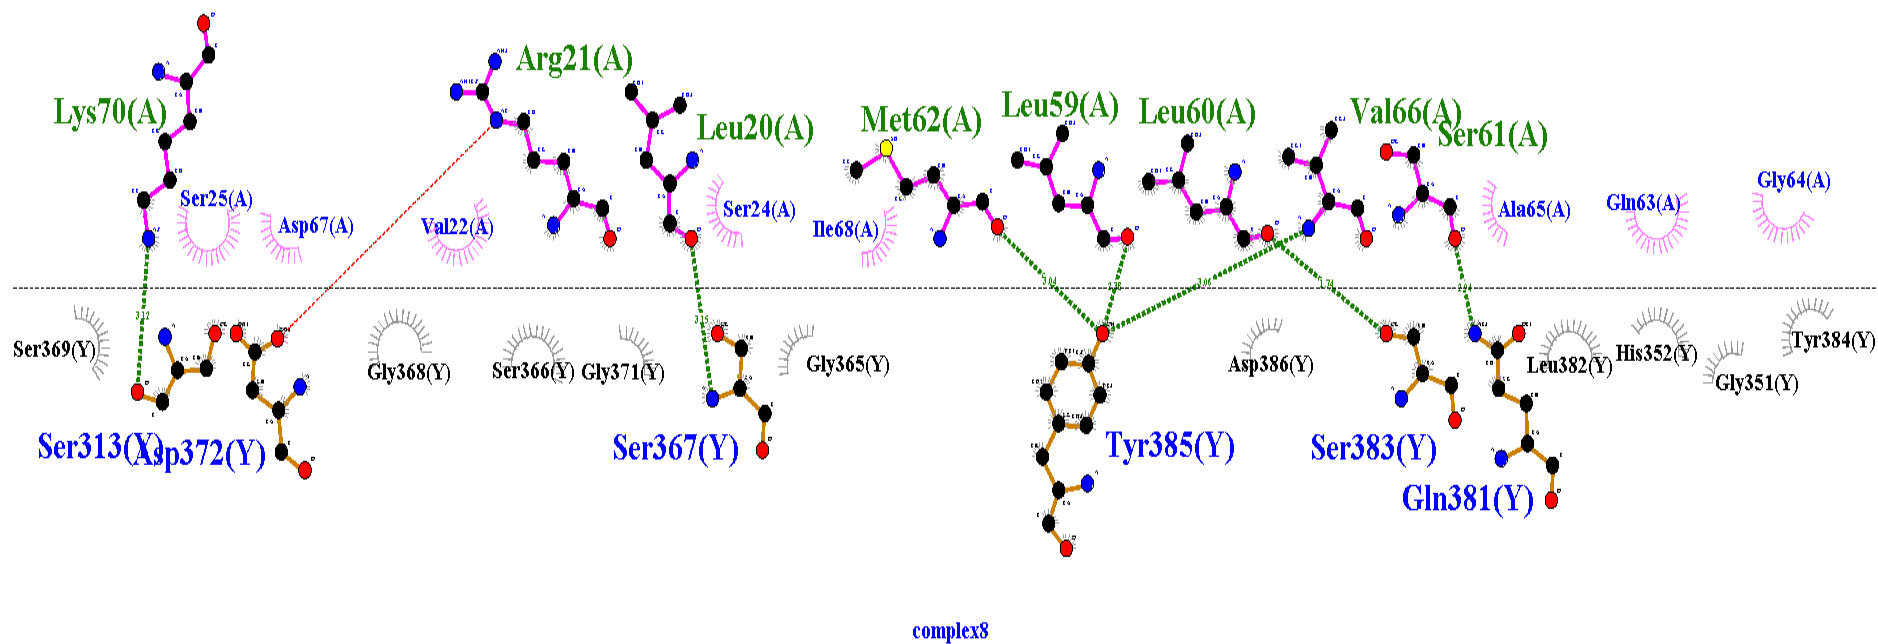

**Fig S62:** 2D representation of interacting residues between LMP-1 (Chain Y) and nsp10 (Chain B) complex 2, provided by the LIGPLOT v.2.2 software. Olive Green lines represent hydrogen bonds, grey semi-circles denote hydrophobic interactions made by LPM1 and Pink semi-circles represent hydrophobic interactions made by the nsp10.

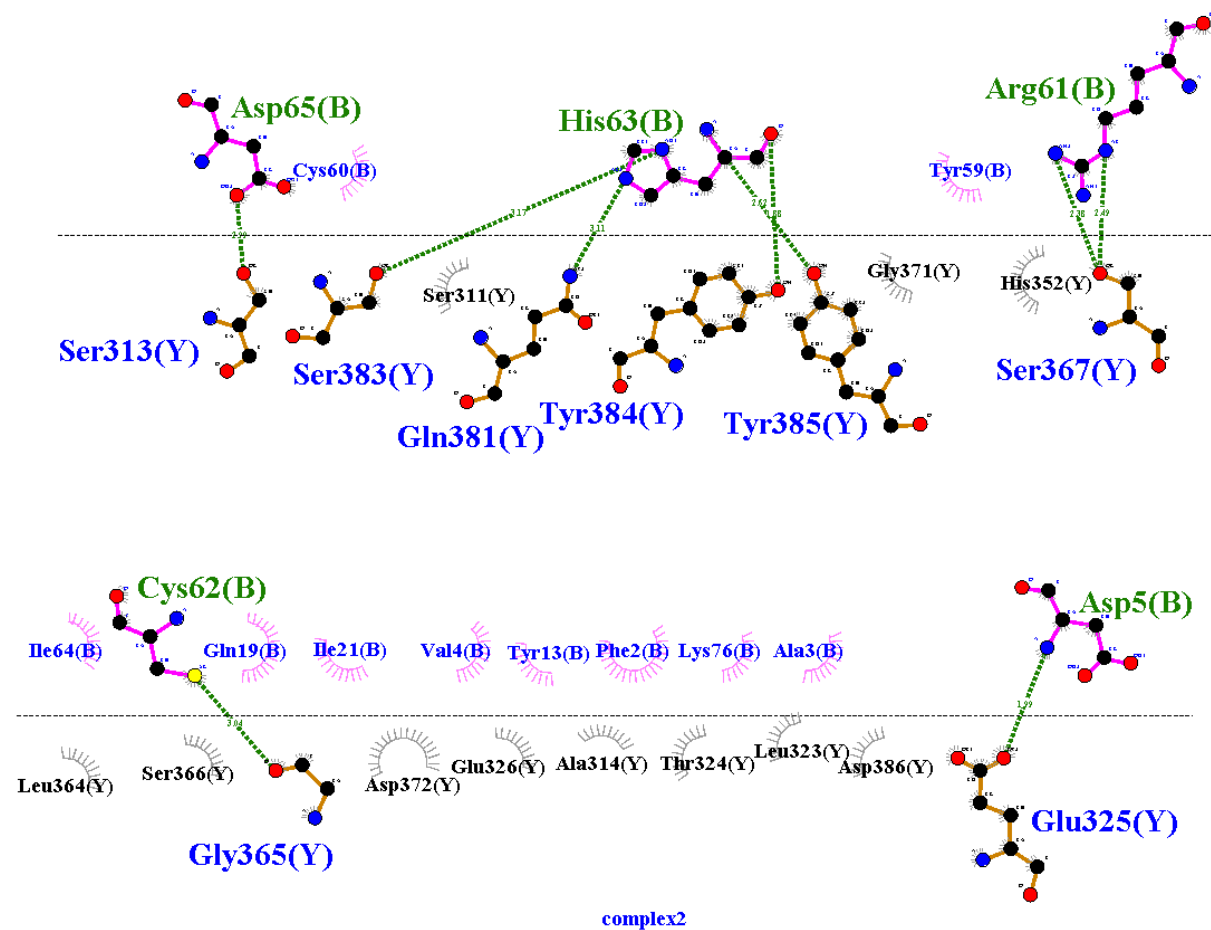

**Fig S63:** 2D representation of interacting residues between LMP-1 (Chain Y) and nsp10 (Chain B) complex 8, provided by the LIGPLOT v.2.2 software. Olive Green lines represent hydrogen bonds, grey semi-circles denote hydrophobic interactions made by LPM1 and Pink semi-circles represent hydrophobic interactions made by the nsp10.

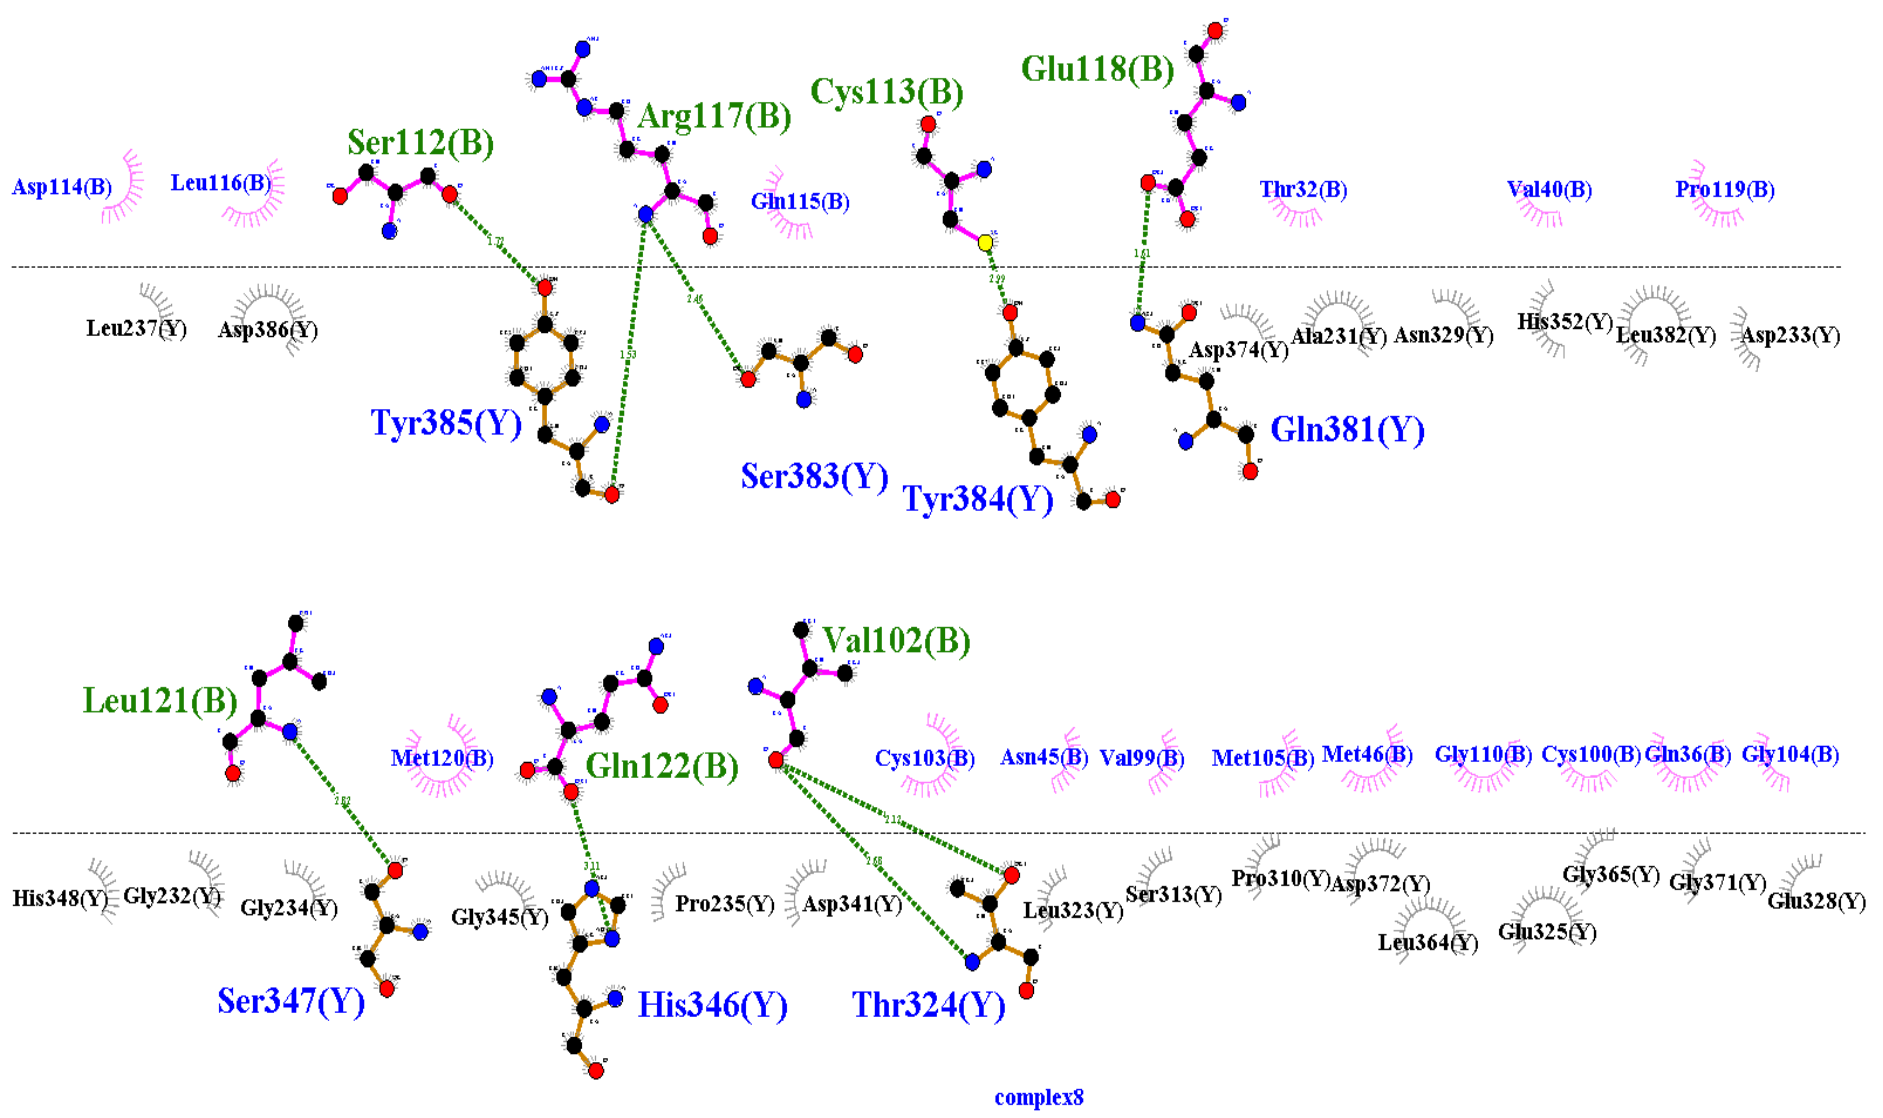

**Fig S64:** 2D representation of interacting residues between LMP-1 (Chain Y) and CoV-2 Spike (Chain B) complex 6, provided by the LIGPLOT v.2.2 software. Olive Green lines represent hydrogen bonds, grey semi-circles denote hydrophobic interactions made by CoV-2 Spike and Pink semi-circles represent hydrophobic interactions made by the LMP1.

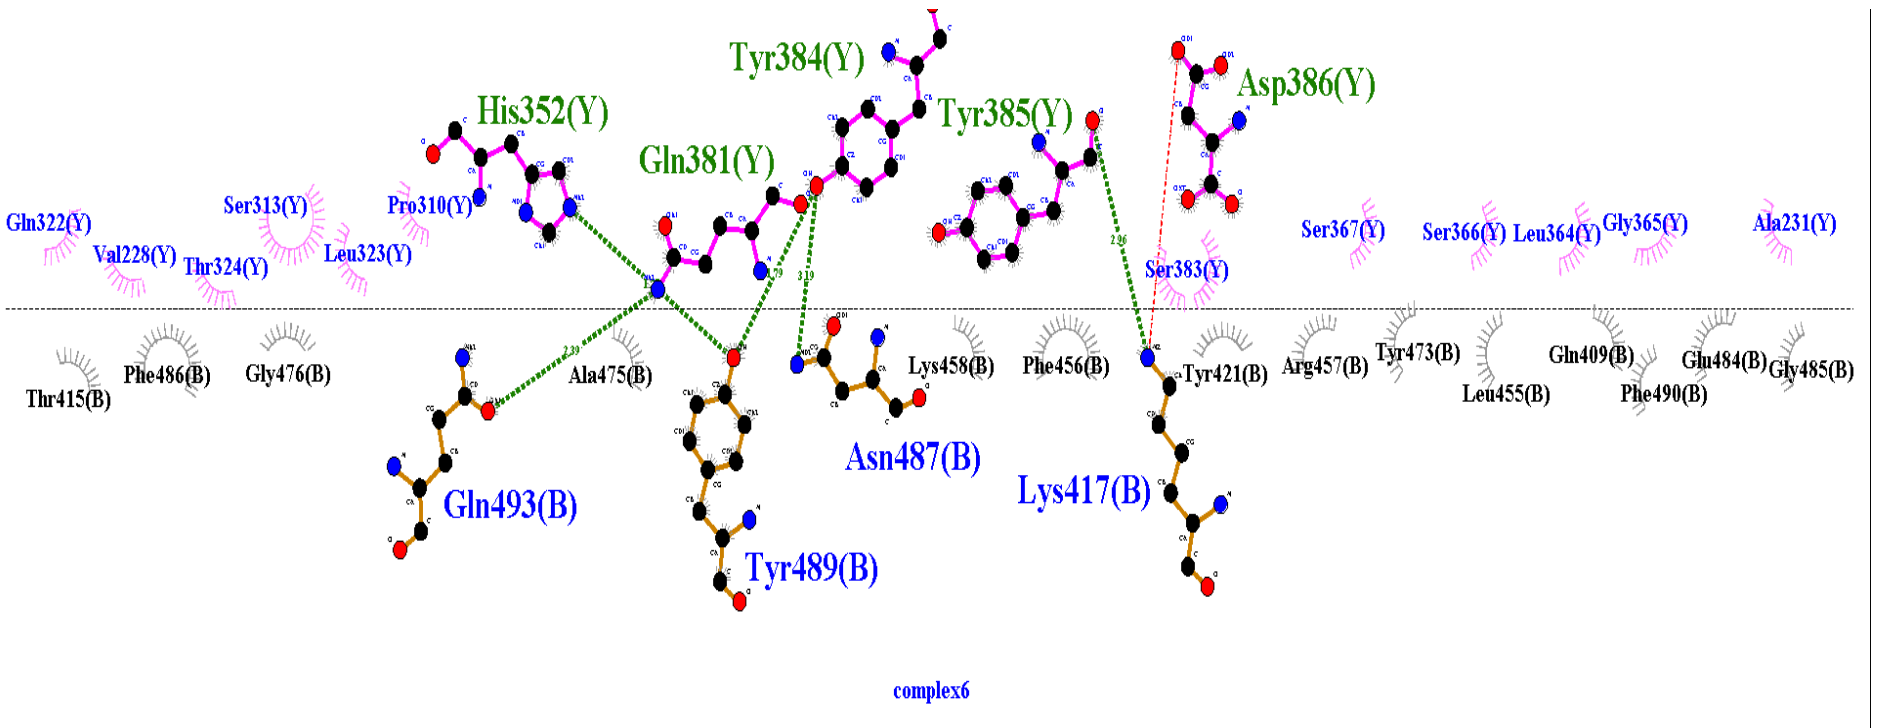



**Fig S65:** 2D representation of interacting residues between LMP-1 (Chain Y) and CoV-2 Spike (Chain B) complex 7, provided by the LIGPLOT v.2.2 software. Olive Green lines represent hydrogen bonds, grey semi-circles denote hydrophobic interactions made by CoV-2 Spike and Pink semi-circles represent hydrophobic interactions made by the LMP1.

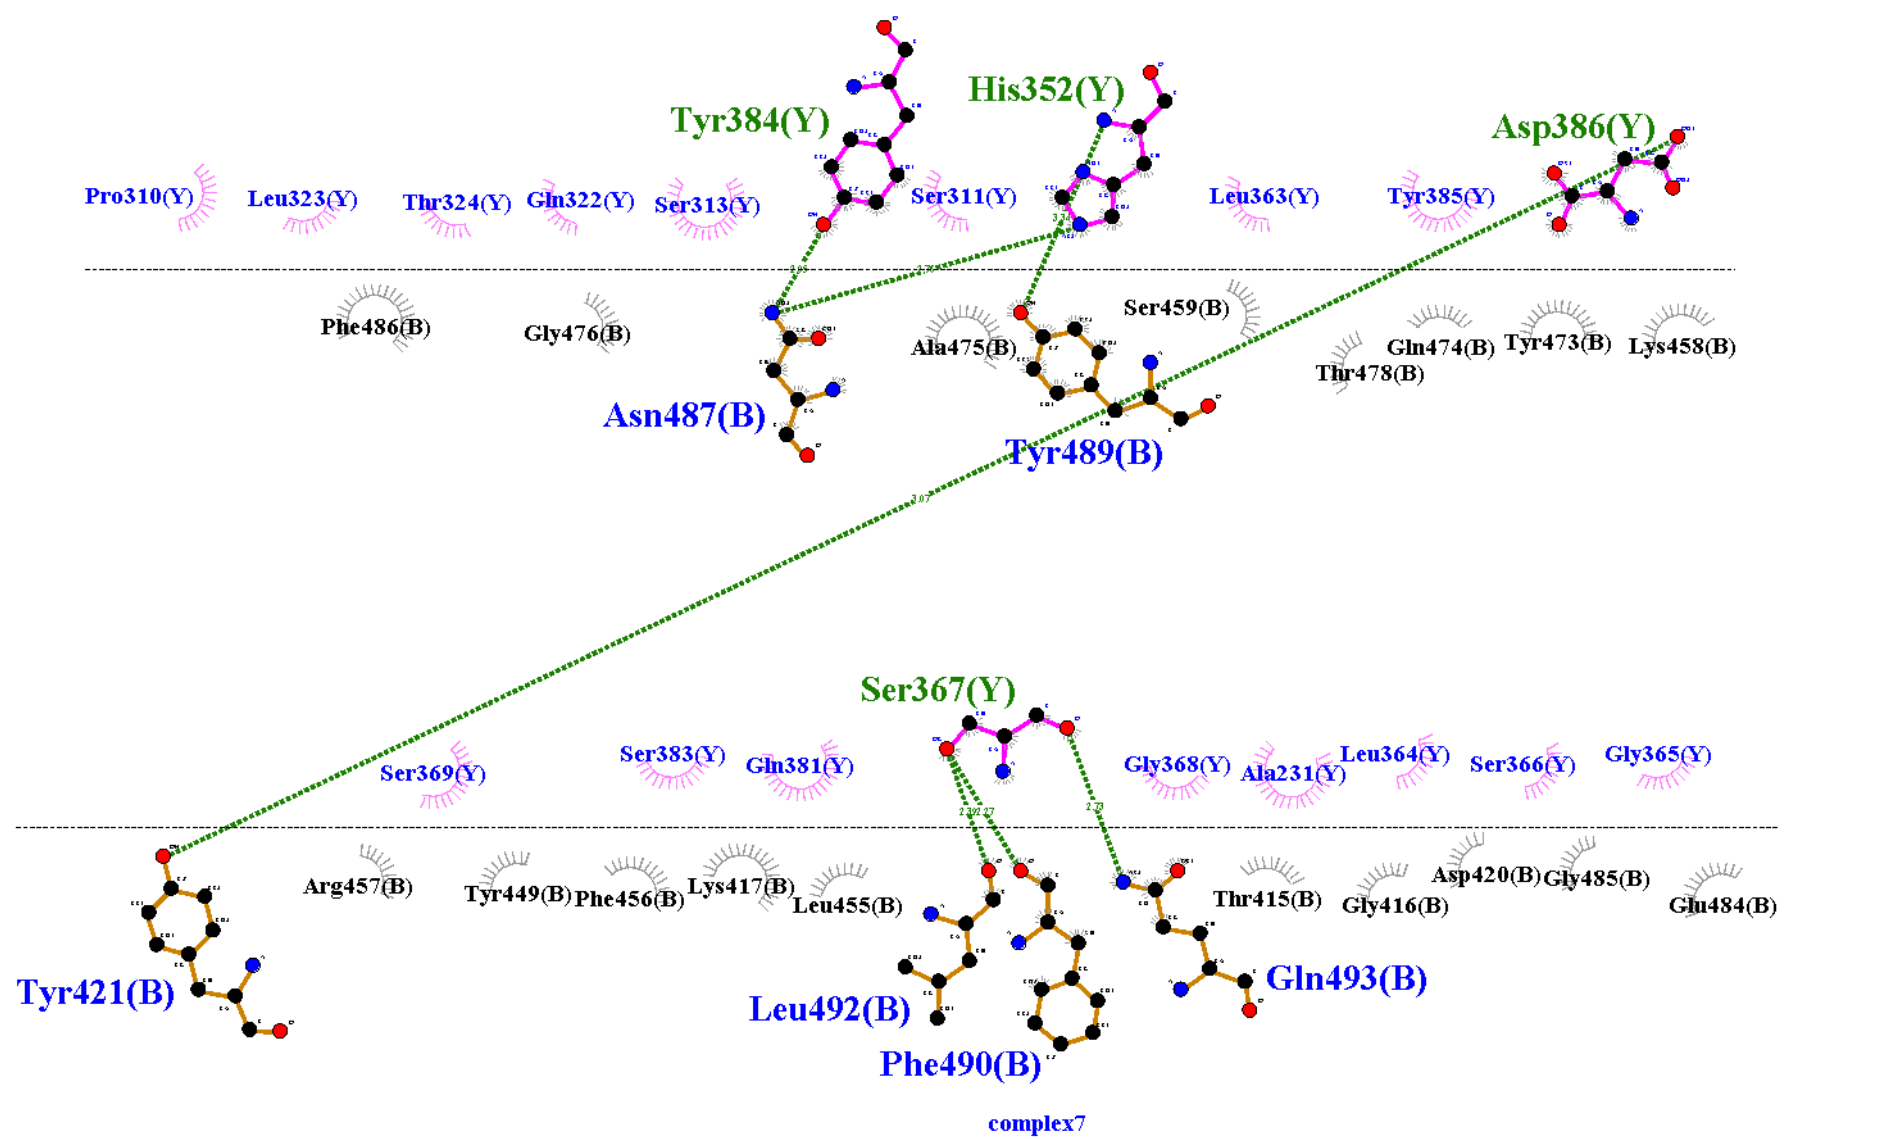

**Fig S66:** 2D representation of interacting residues between LMP-1 (Chain Y) and CoV-2 Spike (Chain B) complex 8, provided by the LIGPLOT v.2.2 software. Olive Green lines represent hydrogen bonds, grey semi-circles denote hydrophobic interactions made by CoV-2 Spike and Pink semi-circles represent hydrophobic interactions made by the LMP1.

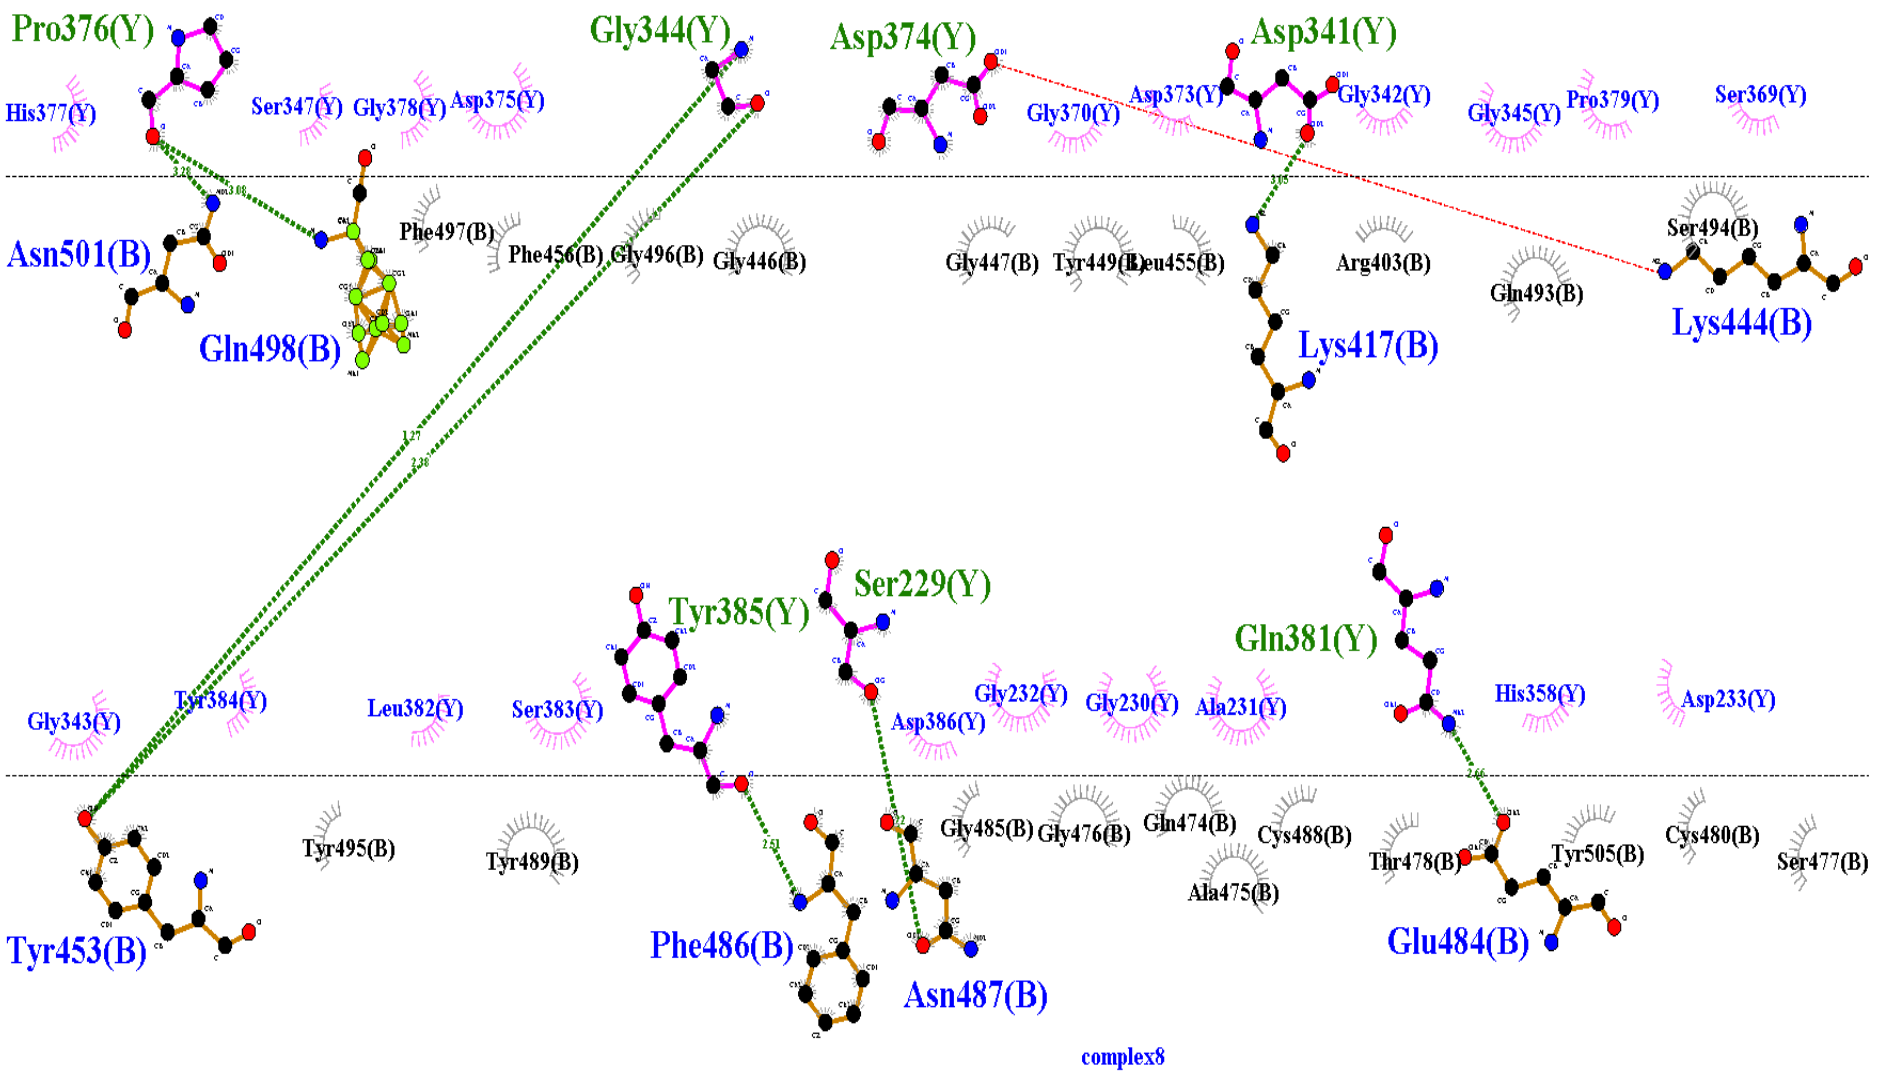

**Fig S67:** 2D representation of interacting residues between PD-1 (Chain G) and CoV-2 Spike (Chain B) complex 2, provided by the LIGPLOT v.2.2 software. Olive Green lines represent hydrogen bonds, grey semi-circles denote hydrophobic interactions made by CoV-2 Spike and Pink semi-circles represent hydrophobic interactions made by the **PD-1**.

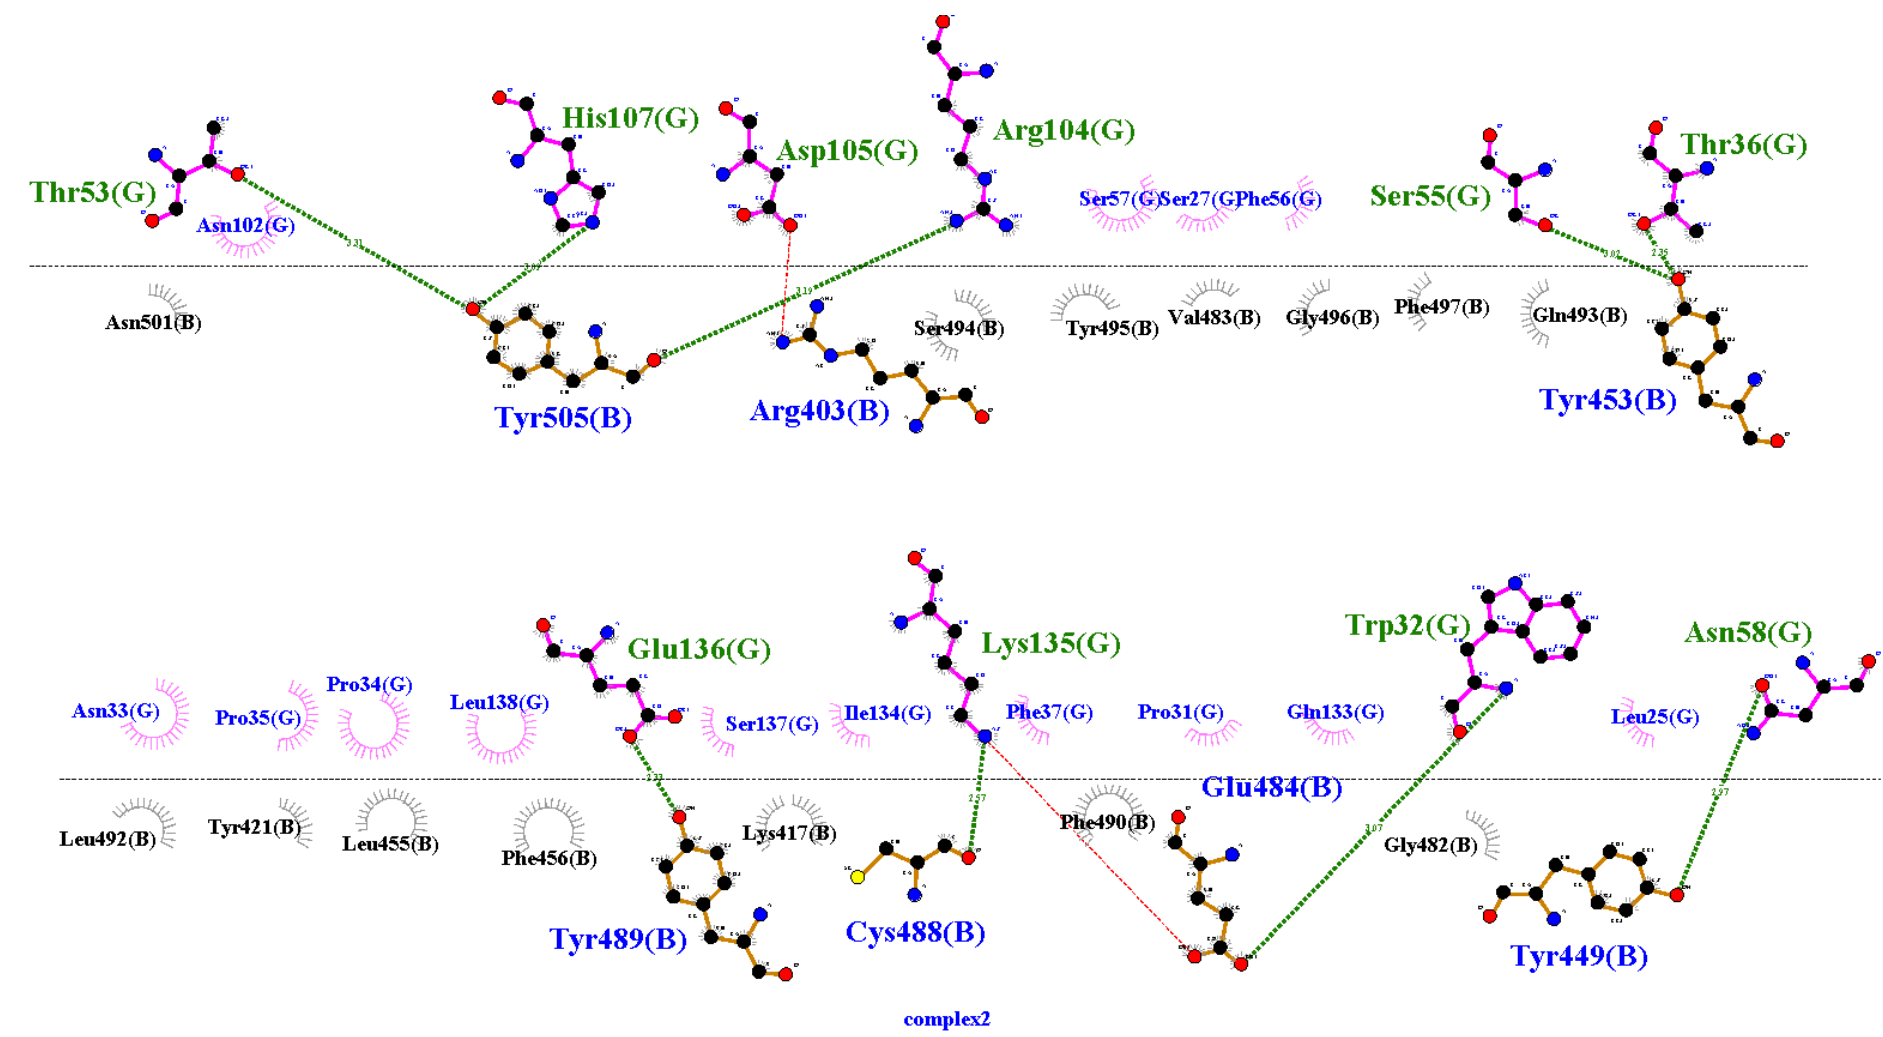

**Fig S68:** 2D representation of interacting residues between PD-1 (Chain G) and CoV-2 Spike (Chain B) complex 7, provided by the LIGPLOT v.2.2 software. Olive Green lines represent hydrogen bonds, grey semi-circles denote hydrophobic interactions made by CoV-2 Spike and Pink semi-circles represent hydrophobic interactions made by the **PD-1**..

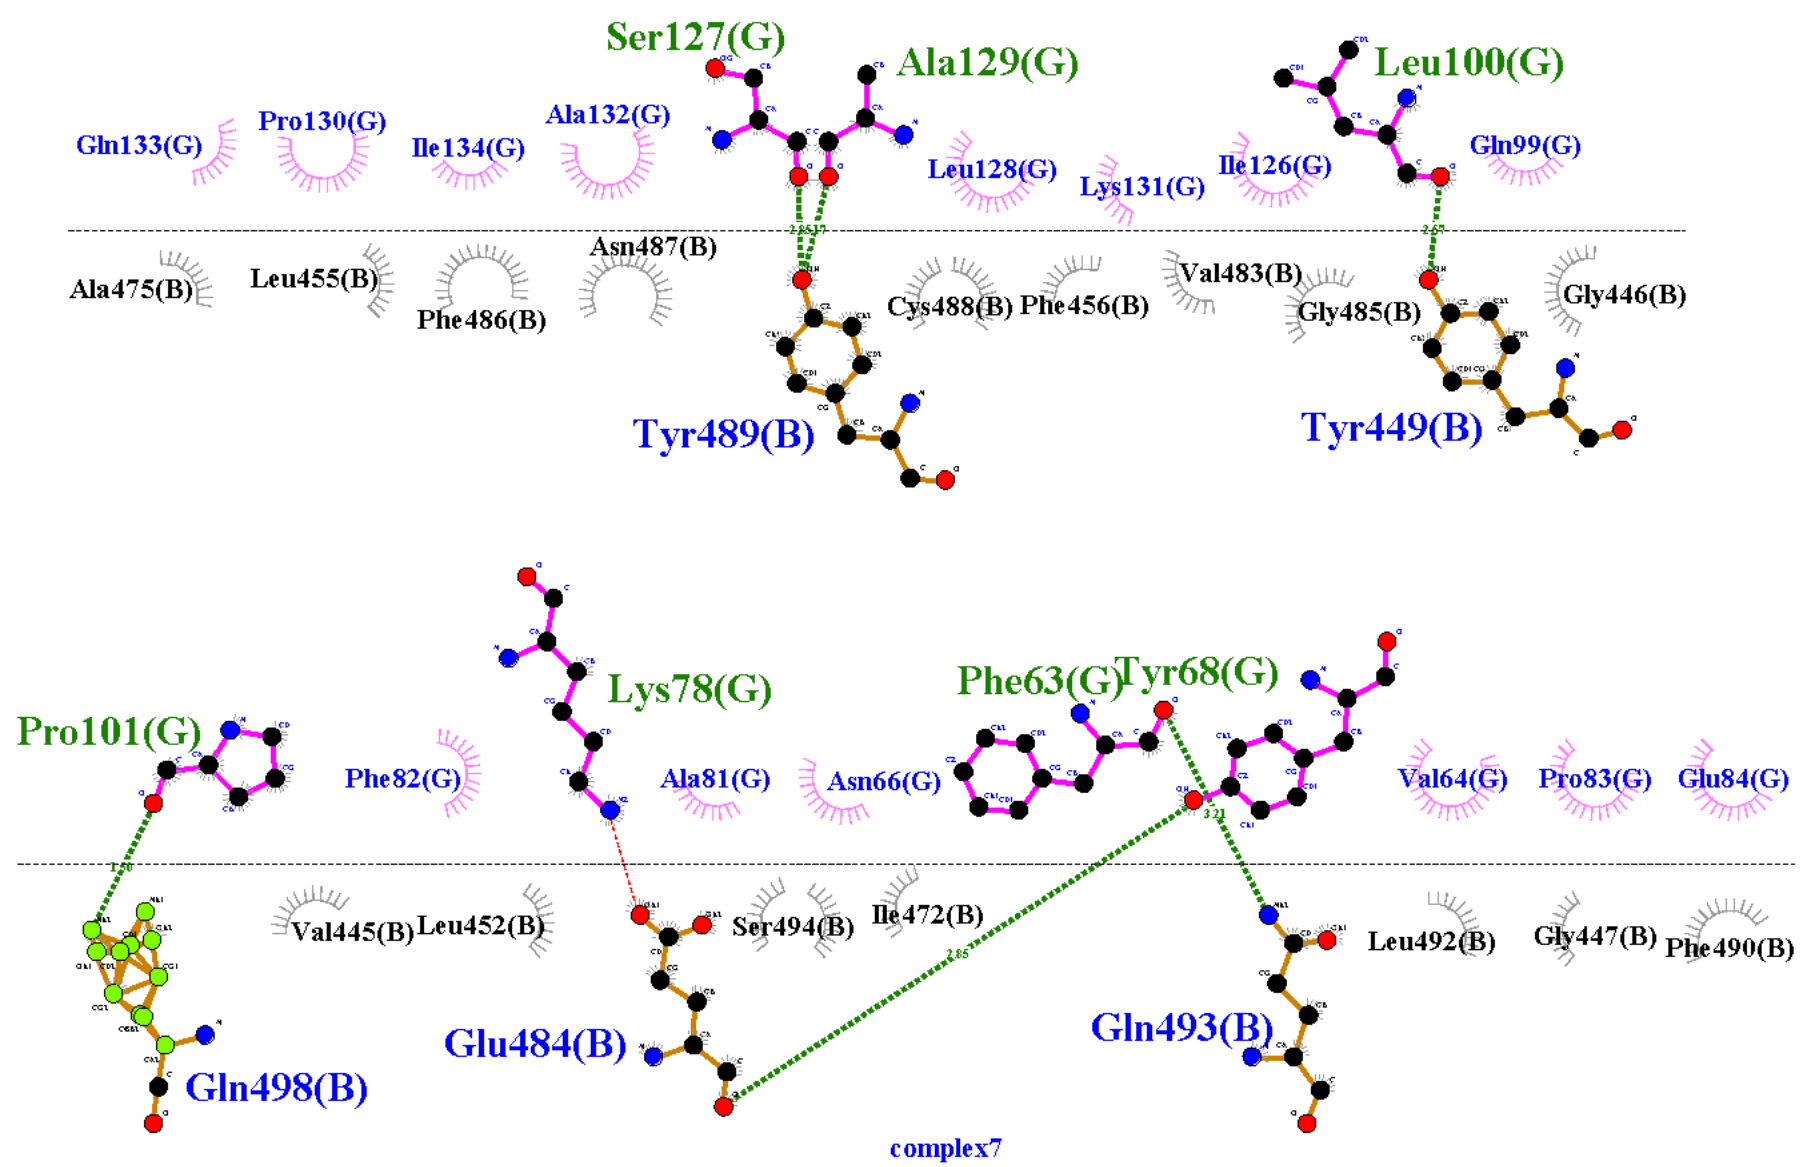

**Fig S69:** 2D representation of interacting residues between PD-1 (Chain G) and CoV-2 Spike (Chain B) complex 8, provided by the LIGPLOT v.2.2 software. Olive Green lines represent hydrogen bonds, grey semi-circles denote hydrophobic interactions made by CoV-2 Spike and Pink semi-circles represent hydrophobic interactions made by the **PD-1**.

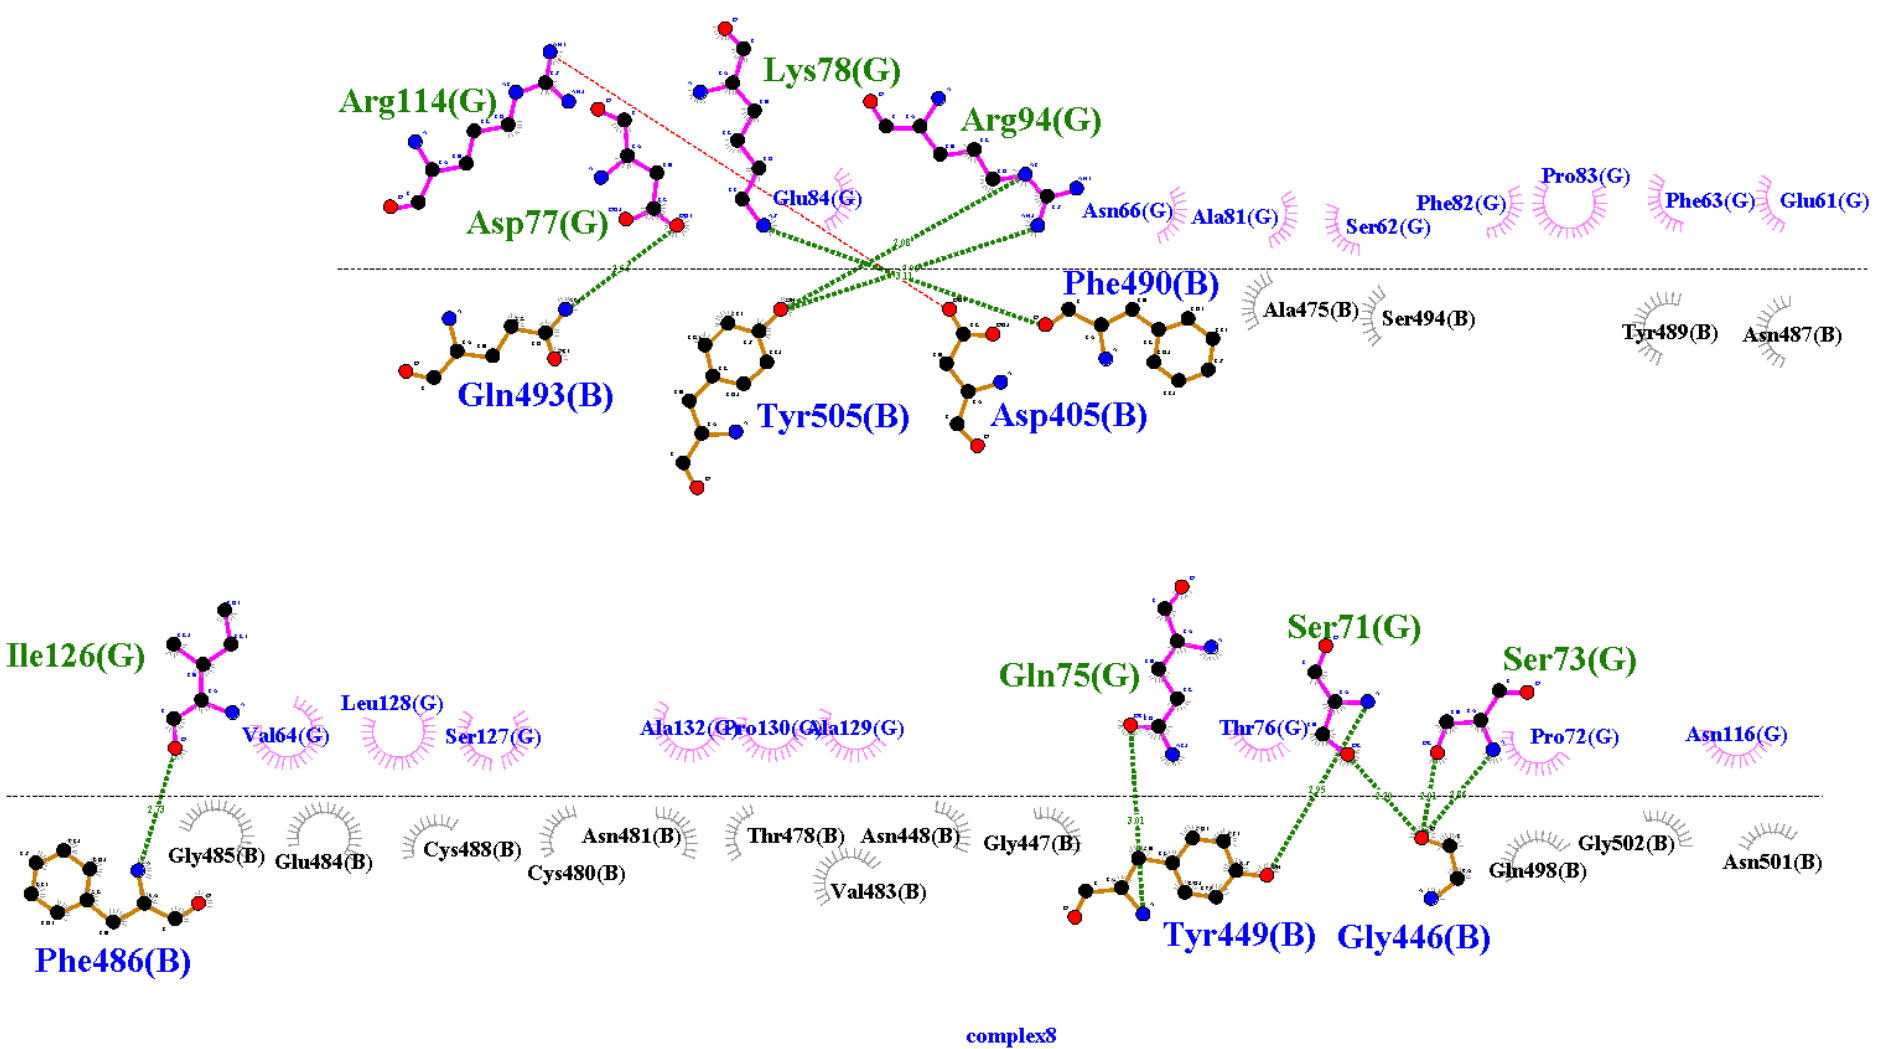

Supplement: s1 [file s1]
