# Supplementary material for: Potential Molecular Mechanisms of Rare Anti-Tumor Immune Response by SARS-CoV-2 in Isolated Cases of Lymphomas
Source: Viruses. 2021 Sep 25;13(10):1927. doi: 10.3390/v13101927 (PMC8539762; doi:10.3390/v13101927)
Supplement: Supplementary file 1 [file viruses-13-01927-s001.zip › Suppl_Table_S1-S6_V16_20-7-21.xlsx]

## Sheet: S1-Protein structures used
Organism	3D Protein structures used	Modelled/ PDB
SARS-CoV-2	Envelope protein	Modelled (QHD43418)
	Spike	6LZG
	Nsp1	7K3N
	Nsp2	Modelled (QHD43415_2)
	Nsp3	6WX4
	Nsp4	Modelled (QHD43415_4 )
	3CLpro/Mpro	6lu7
	Nsp6	Modelled (QHD43415_6)
	Nsp7	7JLT
	Nsp8	7JLT
	NSP9	6WXD
	Nsp10	6W75
	RdRp)/ nsp12	6M71
	NSP13 (helicase)	5RL9
	Proofreading exoribonuclease	Modelled (QHD43415_13)
	Uridylate-specific endoribonuclease (NendoU) (NSP15)	6VWW
	2'-O-methyltransferase (NSP16)	6W75
	M protein	Modelled (RaptorX)
	ORF6	Modelled (QHD43420)
	ORF3a	6XDC
	ORF7a	6W37
	ORF8	7JX6
	Nucleocapsid Phosphoprotein or N protein	6YUN
	ORF9b	6Z4U
	Orf10	Modelled (QHI42199)
	CD 15	Modeled
Human	CD30 / TNFRSF8 (NP_001234.3)	Modeled
	CD15 / FUT4 (NP_002024.1)	Modeled
	CD 20	6y92
	CD 27	5tl5
	CD40/ TNFRSF5	6fax
	CD45/ PTPRC	5FN6
	CD 80	1dr9
	CD 86	1i85
	CD 95/ FAS	3tje
	IRF4/MUM1 (not used)	5bvi
	CTLA4/ CD152	3OSK
	Gamma-tubulin	6V5V
	Gamma-tubulin ring complex	6V6S
	PD-1 in complex with nivolumab-Fab	5WT9
	PD-1 in complex with pembrolizumab Fab	5GGS
EBV	LMP-1 (YP_401722.1)	Modeled

## Sheet: S2-CDs_Spike
Human CD 15 and Sike-RBD docking
A					(i) Lys417, Tyr449, Tyr453 and its nearby residues, (ii) Gln498- Tyr502, (iii) Gln474, Ala475, Phe486, Asn487 , and (iv) Gly496, Gln493 and nearby residues
Complex number	No-HBonds	Residues
		Spike (Chain B)	CD15 (Chain A)	outside
1	6	Gln493,Tyr449,Ala475,Lys458,Asp405,Arg408	His402,Ile398,Arg428,Trp500,Arg352,Asp341	171- 530
2	10	Ser477,Leu492,Gln493,Ser494,Tyr421,Gly446,Tyr449,Asn460	Arg449,Thr164,Thr168,Ser337,His338,Tyr169,Ala165
3	13	Tyr505,Thr500, Gln498,Gly446,Tyr453,Tyr449,Ser494,Asn450,Tyr489,Asn487	Trp500,Arg428,Glu502,Trp504,Asp210,Pro207,Arg206,Leu178
4	11	Tyr449,Gln498,Gly496,Asn501,Asn487,Tyr489,Tyr473,Gln493,Ser494,Leu492	Gly340,Ser344,Arg449,Leu333,Glu448,Ser337,Arg336
5	5	Asn481,Tyr489,Asn487,Tyr473,Lys417	Trp364,Tyr270,Ser203,
6	9	Gly496,Tyr449,Glu484,Gly446,Lys417,Asp405,Tyr505,Gly502	Arg214,Asp210,Arg212,Ser498,Leu178,Gln174,Tyr169,Cys171
7	5	Gln498,Phe490,Tyr505,Ser477	Leu178,Cys171,Arg212,Cys211,Ser337
8	6	Tyr473,Tyr421,Gly476,Asn481,Gly446	Arg206,Ser203,,Glu397,Trp172
9	6	Glu484,Asn487,Gly476,Lys444,Gln498	Ser498,Phe198,Ser203,Cys171,Cly173,Leu175
10	9	Thr478,Ser477,Asn487,Tyr489,Thr415,Tyr473	Ser337,Arg336,Ser491,His487,Asp443,Arg453
Human CD 20 and Sike-RBD docking
B
Complex number	No-HBonds	Residues
		Spike (Chain B)	CD20 (Chain A)	outside
1	6	Val445,Gln498,Tyr473,Tyr421	Cys71,Ser59,Thr43,Trp45	79 – 84
2	4	Tyr449,Val445,Tyr473,Gln474	Asn19,Thr11,Ser145	142 – 188
3	7	Thr500,Gln498,Asn501,Tyr473,Arg403	Arg69,Ser68,Cys71,Trp45,Ser59
4	4	Thr500,Gln498,Tyr489,Glu484	Gln141,Ile115,Leu30
5	7	Ser477,Asn487,Tyr473,Lys444	Glu110,Thr43,Asn113,Phe114,Ser59
6	4	Thr500,Asn501,Gly502,Tyr473	Gln141,Tyr142,Ser145,Met18
7	3	Gln498,Tyr505,Lys417	Leu29,Leu21,Asn19
8	6	Gln498,Tyr505,Gly476,Gln474,Tyr473,Thr415	Leu21,Thr1,Ala14,Gln2,Glu8
9	1	Tyr489	Val144
10	3	Tyr489,Tyr449,Gln493	Ile92,Met53Ser89
Human CD 27 and Sike-RBD docking
C
Complex number	No-HBonds	Residues
		Spike (Chain B)	CD27 (Chain A)	outside
1	6	Tyr449,Gln498,Tyr489,Phe490,Gln474	Cys64,Val49,Gly48,Thr57,His60,Gln15	20 – 191
2	6	Glu484,Asn487,Ser477,Thr478,Lys417,	His60,Gln15,Asp43
3	9	Tyr505,Arg403,Gln498,Lys417,Ser477,Thr478	Pro59,Ser63,Asp32,Lys5,
4	7	Gly446,Thr478,Tyr489,Tyr473,Lys417	Ser63,Lys5,Trp13,Asp32,Ser6,Ala3
5	11	Arg403,Thr415,Thr478,Ser477,Asn487,Tyr473,Tyr421,Lys417	Pro59,His60,Lys31,Ala3,Lys5,Cys7,Ser6,Lys17,Asp32
6	2	Tyr453,Thr500	Pro47,Asp43
7	6	Gly496,Thr500,Asn487,Arg457,Tyr421	Ser63,His66,Cys64,Ser6,Gln15
8	9	Gln498,Tyr453,Gln493,Tyr495,Tyr449,Lys417,Tyr421,Ala475,Tyr489	Ile46,Ser50,Thr57,Leu29,His60,Cys61,Asp32,Gln15,Trp13
9	10	Tyr495,Gln498,Thr500,Gln493,Tyr453,Arg403,Asn487,Tyr489,Lys417	Arg87,Trp90,Leu72,Ser63,Asn88,Gly70,Gly48
10	3	Tyr453,Arg403,Tyr421,Tyr449	Pro59,Asp53,Ser63,Gln15
Human CD 30 and Sike-RBD docking
D
Complex number	No-HBonds	Residues
		Spike (Chain B)	CD30 (Chain A)
1	3	Arg346,Lys417,Tyr489,Arg408	Arg2,His30,Gln21,Glu77
2	6	Ala475,tyr489,Gln493,Ser494,Tyr449	Cys81,Gln56,His30,Phe25,Arg23
3	5	Arg403,Thr500,Lys417,Asp405,Arg408,Tyr489	His35,Arg47,His30,Ser34,Pro20,Glu77
4	5	Lys378,Tyr37,Ser366,Val367	Leu4,Ser371,Gln21
5	11	Arg408,Tyr505,Asp405,Arg403,Ser494,Glu406,Tyr453,Gln493,Gly482	Lys95,Ser103,Arg104,Cys98,Ala78,Thr82,Arg80,Cys81,Gln57
6	3	Gly482,Lys444,Thr470	His35,Asp22,Gly31,His30
7	7	Glu484,Arg466,Arg357,Ile468,Ser468,Ser469,Glu471,Ser494,Gln493	Arg17,Glu77,Asn101,His35,,Tyr46,Arg47,Leu8,Leu5,Ala6
8	2	Glu484,Tyr489,Tyr449	Lys39,Asp79,Gln21
9	4	Thr500,Tyr369,Phe374,Ser375	Trp100,Gln21,His30,Arg23
10	4	Gln493,Tyr505,Gln409,Lys417	His30,Arg42,Asp22,Phe19
Human CD 40 and Sike-RBD docking
E
Complex number	No-HBonds	Residues
		Spike (Chain B)	CD40 (Chain A)	outside
1	6	Tyr449,Gln498,Tyr489,Phe490,Gln474	Cys64,Val49,Gly48,Thr57,His60,Gln15	21 – 193
2	6	Glu484,Asn487,Ser477,Thr478,Lys417	His60,Gln15,Asp43
3	9	Tyr505,Arg403,Gln498,Lys417,Ser477,Thr478	Pro59,Ser63,Asp32,Lys5,
4	7	Gly446,Thr478,Tyr489,Tyr473,Lys417	Ser63,Lys5,Ser6,Ala3,His11,Trp13Asp32
5	11	Arg403,Thr415,Thr478,Ser477,Asn487,Tyr473,Tyr421,Lys417	Pro59,His60,Lys31,Ala3,Lys5,Cys7,Ser6,Lys17,Asp32
6	2	Tyr453,Thr500	Pro47,Asp43
7	6	Gly496,Thr500,Glu406,Asn487,Arg457,Tyr421	Ser63,His66,Cys64,His60,Ser6,Gln15
8	10	Gln498,Tyr453,Gln493,Tyr495,Tyr449,Lys417,Tyr421,Ala475,Tyr489	Ile46,Ser50,Thr57,Leu29,His60,Cys61,Asp32,Gln15,Trp13
9	10	Tyr495,Gln498,Thr500,Gln493,Tyr453,Arg403,Asn487,Tyr489,Lys417	Arg87,Trp90,Asn88,Gly70,Leu72,Ser63,Gly48
10	3	Tyr453,Arg403,Tyr421,Tyr449	Pro59,Asp43,Ser63,Gln15
Human CD 45 and Sike-RBD docking
F
Complex number	No-HBonds	Residues
		Spike (Chain B)	CD45 (Chain A)	outside
1	7	Tyr453,Glu406,Lys417,Tyr421,Tyr473,Asn460,Lys458	Gln187,Glu133,His134,Lys157,Glu135	26 – 577
2	5	Asn487,Glu484,Tyr453,Gln498	Ile235,Asp159,Lys210,Gln187,Trp183
3	9	Glu484,Cys488,Asn487,Lys417,Tyr473,Arg457,Arg403,Gln493,Asn460,Asp420,Gln498	His191,Lys210,Ile235,Glu133,Lys157,Pro186,Gln187,His134,Asn184
4	5	Thr500,Tyr505,Gln493,Lys417,Ser494	Thr182,Pro185,Lys210,Glu133,Asn211
5	8	Tyr473,Arg408,Tyr505,Tyr453,Thr415,Ala475,Leu455,Gln493	Asp216,Thr194,Asp204,Asn207,Tyr197,Lys214,Tyr215,Asn192
6	2	Lys417,Glu484	Gln187,Asn211
7	4	Gly496,Thr500,Thr478,Asn487	Lys225,Tyr223,Gln187,Glu165
8	6	Asn487,Cys488,Lys417,Gln493,Tyr453,Gln498,Asn501	Ile235,His191,Lys210,Glu133,Pro186,Gln187,Asn184,Gln167
9	5	Asn487,Gln498,Arg403,Arg457,Tyr473	Phe190,Glu174,Ile168,Gln187
10	9	Thr500,Asn501,Tyr489,Gln493,Tyr453,Arg408,Arg403	Gln239,Lys214,Asp216,Asn207,Lys203,Asp204,Leu206
Human CD 80 and Sike-RBD docking
G
Complex number	No-HBonds	Residues
		Spike (Chain B)	CD80 (Chain A)	outside
1	8	Thr500,Lys417,Tyr421,Glu484,Ser494,Gly496,Gly446	Thr199,Asn198,Ser129,Lys169,Ser131,Asp115,Arg124	35 – 242
2	3	Gln493,Thr500,Gly502	Asn152,Gln157
3	8	Ser494,Tyr505,Asn501,Gln493,Glu484,Ala475,Tyr473,Tyr489,Thr415	Thr13,Asn55,Lys9,Tyr53,Lys54,Asn48,Met47,Thr62
4	6	Arg403,Tyr453,Tyr489,Tyr473,Tyr421	Asn196,Ser129,Ser112,Thr110
5	7	Asn487,Tyr489,Ala474,Gln498,Tyr449,Gln493	Lys54,Thr57,Asn55,Glu23,Ala26,Gly45
6	3	Asn481,Cys480,Phe486	His3,Ser103,Val104
7	9	Lys417,Tyr489,Thr500,Tyr449,Tyr505,Arg403,Asp405	Lys9,Glu10,Gly45,Thr62,Ile61,Lys54,Tyr53,Asn55
8	7	Tyr449,Tyr489,Tyr505,Tyr421,Asp420,Gln493	Asp90,Asp46,Thr41,Arg94,Lys36,Arg29
9	9	Tyr505,Arg403,Arg408,Glu406,Lys417,Tyr449,Gly496,Gln498	Thr194,Ile113,Thr110,Ser112,Thr130,Val166,Glu17,Asp115,Arg124
10	8	Asn460,Tyr421,Asp420,Asn487,Ser494,Tyr505	Asn55,Lys54,Asp60,Gly45,Met43,Thr41
Human CD 86 and Sike-RBD docking
H
Complex number	No-HBonds	Residues
		Spike (Chain B)	CD86 (Chain A)	outside
1	8	Tyr449,Phe490,Tyr453,Asn405,Gln409	Asn102,Met101,Ser67,Phe17,Ser20,Gln21,Asn22	24 – 247
2	10	Asn501,Gly496,Tyr453,Lys417,Arg403,Tyr505,Glu484,Asp405	Ser55,Met58,Thr61,Ser62,His73,Asp79,Asn74,Glu48,Asn8
3	7	Asp405,Arg403,Asn487,Tyr449,Phe486,Glu484,Gln493	Asn74,Asp66,Met58,Gln23,Ser24,Glu48
4	6	Gln498,Asn501,Tyr453	Ser106,Lys2,Glu104,Met10
5	4	Asn501,Asp405,Asn487,Ser494	Ser106,Gln35,Ile98,Met10
6	7	Gly485,Gln498,Lys417,Tyr421,Arg457,Tyr473	Asn22,Ser20,Gln16,Gln100,Met10
7	6	Gln493,Tyr489,Tyr473,Tyr449,Gln498,Tyr505	Thr10,Ser65,Asp66,Asn8,Gln4
8	6	Ala475,Tyr449,Tyr421,Thr500,Gly502,Tyr505	Lys91,Met95,Gln35,Glu36,His54,Ser52
9	8	Tyr489,Gln493,Arg403,Tyr505,Gln498,Thr500,Tyr449	Thr10,Thr61,Ser55,His54,Phe50,Asp51,Glu48
10	6	Thr500,Tyr449,Gly446,Asn501,Tyr473	Lys90,Thr93,Met95,Pro92,Ser55
Human CD 95 and Sike-RBD docking
I
Complex number	No-HBonds	Residues
		Spike (Chain B)	CD95 (Chain F)	outside
1	5	Gly502,Asn501,Tyr505,Ser477,Thr478	Thr147,Cys130,Phe117,Lys73,Gln70	26 – 173
2	6	Asn487,Lys417,Ser477,Phe490,Gln493,Tyr449	Cys88,Leu90,Asp92,Asp77,Arg86,Gly40
3	4	Lys458,Gln493,Lys417,Tyr449,Gly446	Glu125,Arg86,Asp77,His44,Gly40
4	7	Thr500,Tyr505,Asn487,Tyr453,Ser477,Lys417	Thr147,Thr131,Thr144,Gly72,Glu98,Gln70,Glu100
5	3	Tyr453,Thr478,Gln498	Arg112,Asn116,Lys73
6	6	Gln498,Tyr449,Tyr489,Tyr453,Arg403	Thr106,Gln107,Asn120,Glu100
7	3	Gln493,Tyr489,Gly485	Cys127,Asn120,Asn146
8	7	Gln41,Asp39,Leu90,Arg87	Asn501,Tyr505,Gly496,Gln493,Ser477,Asn487,Tyr489
9	4	Ser477,Lys417,Gln498,Gly446	His95,Asp77,Cys43,His44
10	9	Thr449,Tyr489,Asn487,Ala475,Tyr473,Thr500,Gln498	Gln107,Cys119,Ser121,Asn120,Ser145,Glu71
Human CD 152/CTLA4 and Sike-RBD docking
J
Complex number	No-HBonds	Residues
		Spike (Chain B)	CTLA4 (Chain A)	Outside
1	6	Tyr505,Arg403,Thr478,Tyr489,Asn487	Lys30,Gly29,Tyr105,Gln41,Gly109	36 – 161
2	11	Tyr449,Gly496,Gln498,Asn487,Ser494,Gln493,Asp420,Tyr421,Arg457	Asp118,Pro119,Gly111,Ala86,Met87,Ala42,Gln45,Asp43
3	10	Gln498,Asn501,Thr500,Gly449,Tyr489,Tyr104,Tyr505,Tyr453,Ser494	Met87,Asp88,Arg40,Tyr104,Ile67,Glu48,Thr47,Val46
4	3	Asn487,Tyr489,Gln493	Glu59,Leu60,Glu33
5	2	Thr500,Tyr489	Asp118,Gln7
6	4	Val503,Tyr505,Gln498,Asn487	Asp65,Val49,Gln82,Asp43
7	4	Tyr489,Lys417,Arg457	Asp88,Gln113,Thr47,Gln45
8	6	Glu484,Tyr489,Tyr505,Asn487,Tyr449	Arg16,Gly70,Val110Thr61,Leu60,Ala13
9	3	Tyr453,Phe490,Asn501	Asn110,Ala9,Asp43
10	7	Tyr505,Tyr421,Arg457,Tyr473,Thr500,Gly446,Gln498	Ile108,Ser44,Gln45,Tyr105,Tyr104
Regions: (i) Lys417, Tyr449, Tyr453 and its nearby residues, (ii) Gln498- Tyr502, (iii) Gln474, Ala475, Phe486, Asn487 , and (iv) Gly496, Gln493 and nearby residues

## Sheet: S3-M-GCP2-GCP3-TUBG1
Docking of SARS-CoV-2 M protein with TUBGCP2,TUBGCP3, and TUBG1
A
Complex number	No-HBonds	Residues
		GCP2 (Chain C ) Lateral Position	M-protein (Chain A)
1	4	Gln340,Glu402,Gln337,Lys351	Gly126,Tyr204,Glu167,Thr130
2	4	Ser393,Gln401,Thr395,Gly396	Arg105,Tyr39,Asn41,Thr106
3	9	Ser243,Thr235,Arg290,Ser393	Arg174,Ser173,Arg198,Leu56,Asn5,Thr7
4	4	Asp397,Lys351,Tyr355	Arg200,Thr130,Arg198
5	4	Gln357,Glu286,Asp397,Glu242	His154,Arg186,Arg107,Arg146
6	4	Ser283,Glu286,Tyr393,Arg361	Leu156,Arg131,Arg42,Asn43
7	6	Arg290,Trp353,Gln350,Ser283	Cys33,Thr30,Phe26,Lys50,Asn43
8	2	Gln357,Gln350	Arg105,Ser9
9	6	Ser283,Arg343,Glu509,Gln344	Arg44,Arg198,Met1,Tyr178
10	3	Ser240,Leu232,Thr235	Tyr178,Arg198,Glu167
B
Complex number	No-HBonds	Residues
		GCP3 (Chain B ) Lateral Position	M-protein (Chain A)
1	7	Ser323,Leu319,His329,Arg333	Arg101,Arg174,Ser173,Asn117,Glu115
2	2	Tyr431,His424	His125,Thr127
3	2	Tyr431,Arg315	His125,Asn43
4	4	Arg252,Asn520,His424	Asp3,Thr127,Leu46
5	0	0	0
6	4	His424,Leu427,Tyr256,Arg252	Leu34,Arg42,Glu12,Met1
7	3	His424,Arg252,Tyr431	Arg174,Cys86,Ser211
8	3	Ser312,Ala326,Arg305	Arg107,Arg131,Tyr39
9	8	Tyr431,Glu334,Gln330,Glu331,Ser413,His417,Arg333,His343	Lys162,Asn121,Arg198,Tyr199,Glu167,Thr130,Ile52
10	5	Gln330,Arg333,Ser340,Tyr336,Ser312	Met109,His154,Thr127
C
Complex number	No-HBonds	Residues
		GCP2 (Chain C)-TUBG1 Biniding residues	M-protein (Chain A)
1	5	Ser885,Cys684,Glu731	Arg105,Arg101,Cys86,Gln36
2	0	0	0
3	2	Asn720,Cys684	Gln36,Tyr39
4	1	Gln552	Arg101
5	6	Asp554,Tyr723,Arg711,Asp561,Ser885	Lys205,Asn117,Glu137,Arg101,Thr208
6	3	Thr591,Tyr723	Asp163,Arg198,Thr169
7	2	Asn716,Cys684	Gln36,Arg105
8	4	Tyr723,Gln712,His735	Arg198,Thr169,Gly202,Arg44
9	2	Cys684,Gln719	Glu167,Tyr178
10	2	Asp554,Asn890	Ala188,Leu134
D
Complex number	No-HBonds	Residues
		GCP3 (B Chain)-TUBG1 Biniding residues	M-protein (Chain A)
1	10	Phe612,Gln570,Ser709,Lys689,Thr678,Glu728,Gly569,Tyr720,Lys671	Gln36,Arg131,His154,Glu137,Arg107,Arg42,Asn41,Tyr39
2	6	Arg879,Ser709,Gly569,Gln560,Leu727,Trp731,	Met91,Thr77,Cys33,Phe37,Gln36
3	3	Tyr720,His716,Ser709	Thr106,Arg105
4	2	Glu728,His702	Tyr39,Ile80
5	8	Phe612,Arg681,His716,Ser709,Asn883,Asp572,Gly571	Gln36,Glu137,Arg107,His154,His155,Arg105
6	1	Asp732	Gly202
7	2	Asn883	Leu90,Ser94
8	2	Asn883,Tyr675	Arg105,Arg150
9	2	His716,Glu674	Tyr204
10	5	Tyr720,Asp572,Arg681	Ala98,Arg105,Asn41,Gln36,Cys33
E
Complex number	No-HBonds	Residues
		TUBG1(Chain G) GCP2 -Biniding residues	M-protein (Chain A)
1	9	Pro350,Trp351,Asp442,Arg341,Asn251,His334,Tyr248,Asp252	Arg131,His125,Leu134,Arg101,Gln36,Tyr47,Arg42
2	4	Arg295,Ser445,Arg393,Arg390	Gln19,Arg198,Asn41,Asn43
3	1	Pro330	Cys33
4	6	Tyr366,Ile220Ser226	Arg174,Gln19,Ala63,Cys64,Leu67
5	7	Lys301,Arg217,Lys344,His381,Ser383,His219	Glu135,Leu134,Arg107,Ser94,Arg105,His154
6	7	Ala64,Arg72,His75,Asp216,Thr215	Lys205,Glu115,Asn113,Ser173,Tyr71
7	9	Leu276,Lys363,Tyr273,Glu38,Ser32,Lys23,Ser80,Thr23	Arg44,Arg42,Phe37,Arg101,Arg105,Arg107,Tyr39,Asn41
8	10	Glu426,Pro162,Asp200,Gln197,Pro264,Thr196,Asp433,Arg265,Asp419,Asp422	Arg131,Arg42,Trp110,Tyr39,Asn41,Arg107,Thr127,His125
9	7	Gln357,Thr331,His334,Ser355,Arg341,Glu327	Thr127,Arg131,Leu156,His125,Asp160,Asn41
10	0	0	0
F
Complex number	No-HBonds	Residues
		TUBG1(Chain g) GCP3 -Biniding residues	M-protein (Chain A)
1	9	Pro350,Trp351,Asp442,Arg341,Asn251,His334,Tyr248,Asp252	Arg131,His125,Leu134,Arg101,Gln36,Tyr47,Arg42
2	4	Arg295,Ser445,Arg393,Arg390	Gln19,Arg198,Asn41,Asn43
3	1	Pro330	Cys33
4	6	Tyr366,Ile220Ser226	Arg174,Gln19,Ala63,Cys64,Leu67
5	7	Lys301,Arg217,Lys344,His381,Ser383,His219	Glu135,Leu134,Arg107,Ser94,Arg105,His154
6	7	Ala64,Arg72,His75,Asp216,Thr215	Lys205,Glu115,Asn113,Ser173,Tyr71
7	8	Leu276,Lys363,Tyr273,Glu38,Ser32,Lys23,Ser80,Thr23	Arg44,Arg42,Phe37,Arg101,Arg105,Arg107,Tyr39,Asn41
8	10	Glu426,Pro162,Asp200,Gln197,Pro264,Thr196,Asp433,Arg265,Asp419,Asp422	Arg131,Arg42,Trp110,Tyr39,Asn41,Arg107,Thr127,His125
9	7	Gln357,Thr331,His334,Ser355,Arg341,Glu327	Thr127,Arg131,Leu156,His125,Asp160,Asn41
10	0	0	0

## Sheet: S4-Orf3a-GCP2-GCP3-TUBG1
Docking of SARS-CoV-2 Orf3a with TUBGCP2,TUBGCP3, and TUBG1
A
Complex number	No-HBonds	Residues
		GCP2 (Chain C ) Lateral Position	Orf3a (Chain A)
1	2	Ser393,Lys375	Tyr113,Tyr91
2	2	Trp353,Arg290	Phe97,Leu86
3	2	Arg290,Gln350	Ala110,His93
4	7	Arg361,Ser393,Glu242,Trp353,Arg290	Ile236,Asp210,Lys61,Tyr189,Asp142
5	3	Ser283,Leu346,Ser348	Phe207,Ser161
6	1	Arg290	Leu86
7	2	Ser283,Trp353	Gly76,Leu83
8	3	Arg290,Arg361	Leu86,Phe87,Val197
9	4	Lys409,Trp353,Arg290,Lys351	Gly224,Glu226,Ile62,Asp142,Ile63
10	3	Ala239,Gln401,Thr395	Ser40,Lys136
B
Complex number	No-HBonds	Residues
		GCP3 (Chain B ) Lateral Position	Orf3a (Chain A)
1	2	His424,Tyr256	Ser205,Tyr107
2	6	Arg337,Ser428,Tyr256,Arg333,Thr501	Ser117,Lys136,Leu101,Gln116,Glu194
3	7	Tyr256,Arg252,Arg337,Arg333,Gln416,Arg315,Gln322	Val163,Ile118,Asn119,Tyr107,Lys61,Ser58
4	4	Asp436,Lys533,Leu427,Thr501	Cys200,Asp238,Tyr211,Asp199
5	8	His343,Ser344,His424,Arg333,Asp309,Arg305,Tyr256,Ser340	Tyr189,Asn161,Ser92,Gln57,Ser58,Thr64,Asp142
6	2	His343,Arg337	Lys192,Trp69
7	5	Arg333,Ser323,Arg252,Gln322,His343	Asp142,Ser165,Lys61,Asp210
8	4	His329,Ser413,Pro409,Gln330	Lys61,Pro104,Tyr107,Gln57
9	4	Lys533,Arg315,Ser312	Ala99,Ala54,Ser58
10	5	Ser428,Gln347,Arg432	Ser166,Ser92,Ser165
C
Complex number	No-HBonds	Residues
		GCP2 (Chain C)-TUBG1 Biniding residues	Orf3a (Chain A)
1	0	0	0
2	1	Asp554	Gln57
3	7	Cys684,Gln719,Tyr723,Asn890	Val163,Ser166,Tyr215
4	1	Tyr723	Arg68
5	0	0	0
6	3	Asn890,Tyr723,Gln712	His150,Lys132,Trp131
7	6	Gln719,Gln722,Cys684,Asn716,Gln552	Lys192,Trp193,Cys153,His182,Lys67
8	1	Asn890	Ser40
9	7	Gln722,Gln719,Cys684,Asn716,Gln712,Asp561,Arg681	Lys192,Trp193,Cys153,His182,Asn152,His227,Gly174
10	2	His735,His558	Glu102,Lys61
D
Complex number	No-HBonds	Residues
		GCP3 (B Chain)-TUBG1 Biniding residues	Orf3a (Chain A)
1	12	His716,Tyr720,Asn883,Gln717,Ser709,Arg681,Thr678	Asp210,Asn144,Tyr145,Ser162,Ser166,Thr164,Ser165
2	2	Asn883,Thr678,Arg681	Asn152,Leu127,Lys136
3	5	His702,Glu728,Asn609,Gln570,Gln717	Leu83,Lys192,Thr151,Asn152,Trp69
4	1	Ala607	Lys136
5	4	His885,Arg575,Arg879	Trp131,Asp238,His150
6	4	Ser709,Ile706,Thr678	Lys198,His150,Asn152,Cys200
7	1	Lys682	Ile124
8	2	Asp572	Gln70,Trp69
9	1	Tyr720,	Lys136
10	2	His716,Tyr720,	Asp155,Arg134
E
Complex number	No-HBonds	Residues
		TUBG1(Chain G) GCP2 -Biniding residues	Orf3a (Chain A)
1	4	Arg341,His334,Gln357,Tyr248	Phe207,Tyr211,Ile124,Cys130
2	1	Pro353	Ser117
3	7	Val305,Arg212,Arg390,Asp216,Arg343,Gln394	Lys136,Asp155,Tyr154,Arg134,Arg68,Leu83,Asn152
4	4	Arg390,Leu345,Asn347,His315	Met125,Arg134,Trp131,Ile124
5	1	Tyr248	Leu101
6	1	Arg296	His93
7	2	Gln357,Thr331	Tyr113,Leu101
8	5	Ser383,Arg393,Ser386,Glu389	Trp45,Ser40
9	1	His334	Ser209
10	4	Thr331,Lys163,Gln357	Met125,Ser40,Ser117,Tyr113
F
Complex number	No-HBonds	Residues
		TUBG1(Chain G) GCP3 -Biniding residues	Orf3a (Chain A)
1	4	Arg341,His334,Gln357,Tyr248	Phe207,Tyr211,Ile124,Cys130
2	1	Pro353	Ser117
3	7	Val305,Arg212,Arg390,Asp216,Arg343,Gln394	Lys136,Asp155,Tyr154,Arg134,Arg68,Leu83,Asn152
4	4	Arg390,Leu345,Asn347,His315	Met125,Arg134,Trp131,Ile124
5	1	Tyr248	Leu101
6	1	Arg296	His93
7	2	Gln357,Thr331	Tyr113,Leu101
8	5	Ser383,Arg393,Ser386,Glu389	Trp45,Ser40
9	1	His334	Ser209
10	4	Thr331,Lys163,Gln357	Met125,Ser40,Ser117,Tyr113

## Sheet: S5-EBV_LMP1_nCOV Proteins
Epstein-Barr virus LMP 1 Protein and nsp1 protein/ PDB ID 7K3N nCoV docking
A
Complex number	No-Hbonds	Residues
		LMP1 (Chain Y)	nsp1 (Chain A)
1	6	Asp386,Cys238,His225,Asp193,Ser192,Glu214	Lys38,Lys116,Leu79,Tyr88,Arg90
2	6	Glu325,Asp386,Thr324,Pro310,Gln322	Ser8,Arg115,Ser65,His74,Gly73
3	3	Asp386,Cys238,Tyr385	Asp66,Arg115,Ser65
4	2	Ser366,Ser367	Arg115
5	10	His352,Ser313,Tyr384,Tyr385,Cys238,Asp386,His225	Tyr109,Ser8,Cys42,Leu114,Val5,Met76,Lys111
6	6	Ser313,Asp312,Tyr384,Cys238,Asp386	Arg110,Arg64,His74,Asp66,Lys116,Arg115
7	2	Arg223,Asp312	Arg115
8	5	Asp284,Asp268,Pro267,Gly318,Gly319	Lys311,Arg110,Arg64,Arg115,Ser65
9	5	Asp386,Cys238,Pro310	Ser65,Arg115,Asp66,His74
10	11	Tyr384,Tyr385,Leu364,Asp372,Ser367,Ser366,Glu328	Gln13,Glu46,Arg110,Arg64,Thr94,Val47,Glu93,Lys111
Epstein-Barr virus LMP 1 Protein and nsp2 (QHD43415_2 ) nCoV docking
B
Complex number	No-HBonds	Residues
		LMP1 (Chain Y)	nsp2 (QHD43415_2 )Chain A)
1	6	Lys330,Asp317,His213,Asp333,Gly335,Arg223	Cys229,Ser232,Gly235,Ser211,Arg218,Asp114
2	9	ASn329,Gln334,Ser313,Asn316,Ser367,Asp271,Asp284	Arg246,Ser232,Gly115,Tyr124,Pro125,Glu102,Lys110,Lys219,Arg218
3	4	His276,Asp250,Glu325,Ser313	Lys219,Lys45,Arg52
4	2	Asp272,Pro267	Lys219
5	7	Lys330,Asp284,Asn269,Asp271,Asp272,Asp268	Val230,Arg218,Lys214,Gln182,Lys219,Lys239,Arg222
6	9	Asp386,Asp341,Ser313,Ser311,Cys238,Gly318,Glu221,Asp210	Lys219,Arg121,Arg119,Leu113,Tyr233,Phe116,Lys111,Arg107,Lys110
7	4	Asn316,Glu326,Gly318,Asp284,Asp268	Thr256,Arg246,Ser232,Ser211,Ile216
8	4	Ser366,Leu201,Ala207,Ser367	Asn209,Ser122,Lys111,His208
9	8	Leu242,Asp304,Asn269,Pro267,Asp268,His303,Asp298,Asp284,Asn285	Cys236,Arg222,Gly212,Gln182,Asn183,Lys214,Pro181
10	3	Ser383,Ser313,Ser367	Asp114,Lys112,His54
Epstein-Barr virus LMP 1 Protein and PLpro/nsp3 PDB ID 6wx4 nCoV docking
C
Complex number	No-HBonds	Residues
		LMP1 (Chain Y)	PLpro/nsp3 (Chain D)
1	6	Asp372,Ser367,Asp386,Gly230,Val228,Leu226	Lys105,Asp286,Gly163,Cys270,Gln269
2	6	Gly230,Asp386,Ser383,Tyr384,Ala314	Cys270,Asn109,Trp106,Asp108,Asn88
3	8	Thr297,Asp298,Asp268,Asp284,Thr259	Gln269,Tyr268,Tyr207,Arg166,Gly227,Cys224
4	7	Gly230,Ser383,Tyr384,His352,Glu325,Gln381	Trp106,Asn109,His272,Cys270,Tyr268,Gly160
5	5	Glu325,Tyr385,Asp386,Ser383,Ser366	Cys111,Asp286,Ala288,Asn99
6	5	Tyr384,His357,Tyr385,Glu325,Gln381,Glu328	Glu318,His319,Lys228,Lys315,Lys190
7	6	Ser367,Asn251,Gln205,Gly234	Tyr207,Lys232,Gln269,Tyr268
8	7	Tyr385,His352,Asp317,Asp372	Arg104,Thr102,Gln97,Tyr283,Lys292,Lys94
9	13	Gly371,Asp386,Cys238,His352,Tyr384,Gly230,Gly232,Ser311,His225,Glu325,Pro310,Thr324,Gln189	Gln221,Tyr273,Cys270,Pro284,Tyr264,Gly266,Gln269,Asn109,Lys297,Gln250,Glu252,His89
10	1	Asp371	Lys45
Epstein-Barr virus LMP 1 Protein and nsp4 (QHD43415_4 ) protein nCoV docking
D
Complex number	No-HBonds	Residues
		LMP1 (Chain Y)	nsp4 (Chain A)
1	4	Ser367,Asp386,Ser192,Asp233	Ser179,Thr319,Ser358,Lys1
2	6	Asp386,Tyr384,Leu226,His225,His196,Ser309	Trp376,Pro333,Trp365,Met368,Val367,Tyr335
3	9	Asp375,Asp372,Tyr384,Asp386,Asp312,Ser313,Asp317,Ser311,Gln189	Lys388,Trp392,Tyr391,His389,Lys165,Asp161,Lys1,Ser163,Asn115,Tyr25
4	3	Gln205,His195	Leu372,Phe369,Gly340
5	4	Asp293,His187,Glu194	Arg400,Tyr335
6	7	Asp261,Asp250,Asn251,Gln205,Ser229,Asp233,Pro202	Thr37,Trp6,Arg78,Lys8,Thr83,Glu310
7	3	Asp374,Ser369,Ser367	Arg306,Arg305,Asn84
8	13	Asp271,Asp272,Pro267,Asp268,Asp216,Ser219,Asn316,Pro256,Asn220,Ser217,Ser215	Arg78,Asn4,Arg222,Arg306,Arg305,Ser81,Tyr311,Als307,Lys86,Ala65
9	7	Pro294,Asp295,Pro376,Gly290,Asp255,Asp257	Tyr453,Lys452,Gln500,Arg249,Arg211,Arg240
10	13	Ser311,Asp386,Cys238,Val228,Asp317,His224,His196,His197	Tyr142,Tyr134,Val210,Asn131,Glu141,Thr143,Phe145,Ser184,Phe24,Tyr25
Epstein-Barr virus LMP 1 Protein and 3CLpro/Mpro PDB ID 6lu7 protein nCoV docking
E
Complex number	No-HBonds	Residues
		LMP1 (Chain Y)	3CLpro/Mpro (Chain A)
1	6	His352,Tyr384,Tyr385,Leu382,Ser383,Ser367	Asn274,Gly275,Asn277,Ala285
2	9	Asp386,His225,Leu226,Arg223,Asp193,Ser192	Arg217,Thr257,Gln256,Thr304,Ser301,Thr292,Arg298
3	7	Glu326,Thr324,Ser313,Tyr384,Ser311	Asn277,Asn274,Leu272,Glu270,Gln273,Tyr237
4	3	Ser229,Gln205	Phe305,Thr304
5	8	Glu325,Tyr385,Asp312,Tyr384,Asp317,His352,Thr324,Gly365	Val233,Gly275,Arg222,Asn274,Glu270,Gln273,Leu272
6	8	Gly234,Ser229,Gln205,Gln254,Gly252,Arg190,His203,Asp198	Gln306,Thr304,Ser1,Tyr154,Val297,Arg298
7	4	Asp386,His225	Ser284,Lys5,Gln299
8	9	His225,Asp386,His195,Asp193,Arg223,Gly222,His224,Ser219	Ile249,Ser254,Val297,Arg298,Thr111,Asn151,Asp153,Lys102
9	7	Ser383,Tyr385,Tyr384,Ser313,Thr324,Glu328	Asn277,Arg279,Glu270,Lys269,Gln273,Lys236
10	11	Gln381,Gly345,Asp341,Ser347,Ser383,Val228,Ala231	Arg298,Gly302,Ser301,Thr304,Ther304,Gln306,Phe305,Ser1,Phe3
Epstein-Barr virus LMP 1 Protein and Nsp6 (QHD43415_6)protein nCoV docking
F
Complex number	No-HBonds	Residues
		LMP1 (Chain Y)	Nsp6 (Chain A)
1	9	Asp341,Asp250,Asn251,Ser347,Asp233,Gln381,Ser229,Gln205,Asp295	Ser1,Thr20,Met57,Met58,Thr17,Lys61,Phe36,Ser28,Arg5
2	8	Asp298,Asp299,Asn285,Asp287,Asp284,Asp30,Asp268,Asn241,Gly318	Lys61,Lys281,Gln290,Gln249,Lys270,Cys229,Arg236,Tyr38
3	9	Gly371,Ser369,Leu363,Ser367,Gly365,Asp374	Ile49,Arg233,Leu37,Tyr38,Ser53,Tyr234,Lys61
4	3	Asp386,Ser383,Ala231	Ser28,Phe36,Ser21
5	7	Glu214,Tyr384,His352,Ser367,Gly365,Asp372,Glu325,Asn316,Glu221	Lys263,Cys197,Tyr196,Val194,Arg129,Arg187,Ser265,Arg252
6	11	Tyr385,Gly351,Ser347,Asp233,Asp349,Ser369	Arg236,Arg233,Glu39,Phe34,Tyr38,Ser21,Thr20
7	6	His203,Asp233,Gln292,Ser229,Gln205	Phe35,Arg236,Arg233,His62,Tyr38
8	8	Tyr385,Asp386,Val228,Ser313,Asp317	Cys197,Asn255,Asn264,Ser265,Trp140,Met183,Ser176
9	4	Asp304,Asp284,Cys318,Pro307	Arg236,Cys229,Tyr38
10	7	Asn262,Asp257,Asp277,His276,Asp250,Leu201	Met57,Lys61,Tyr38,Trp13
Epstein-Barr virus LMP 1 Protein and Nsp7 protein PDB ID 7JLT_A nCoV docking
G
Complex number	No-HBonds	Residues
		LMP1 (Chain Y)	Nsp7 (Chain A)
1	5	Ser367,His352,Tyr385,Gly365	Gly64,Ser61,Met62,Leu20
2	8	Tyr384,His352,Tyr385,Gly328,Thr324,Ser311,Gly365	Gly64,Ala65,Arg21,Leu20,Lys70
3	5	Tyr385,Gly365,Ser367,Ser366	Ile68,Asp67,Val66,Gly64
4	5	Ser347,Ser313,Ser311,Cys238	Arg79,Cys8,Asp5
5	3	Glu325,Asp386,Tyr385	Arg21,Met62,Asn69
6	8	Ser383,Tyr385,Ser367,Gly368,Gly371,Ser369	Leu59,Leu60,Met62,Leu20,Arg21,Ser24
7	8	Tyr384,Ser313,Tyr385,Gln381,Ser367,Gly371	Gly64,Lys70,Leu59,Ser61,Met62,Val58,Ser26
8	7	Ser313,Ser367,Tyr385,Ser383,Gln381	Lys70,Leu20,Met62,Leu59,Leu60,Val66,Ser61
9	8	Asn329,Glu328,Thr324,Tyr383,Asn316,Glu221,Asp210	Arg79,Cys72,Asn69,Thr9,Gln31,Ser54
10	8	Ser366,Ser367,Ser311,Tyr385,His352	Leu20,Met62,Leu59,Val66,Asn69,Asp67
Epstein-Barr virus LMP 1 Protein and Nsp8 protein PDB ID 7JLT_B nCoV docking
H
Complex number	No-HBonds	Residues
		LMP1 (Chain Y)	Nsp8 (Chain B)
1	6	Ser313,Ser383,Gly365,Pro376,Ser367	Thr47,Asn24,Pro40,Thr8,Arg4,Ile30
2	6	Pro376,Gly370,Asp386,Gly378,Asp233,Ala231	Thr8,Gln12,Arg114,Met11,Lys21,Asn24
3	3	Asn251,Tyr385	Ile44,Thr8,Arg4,
4	2	Thr340,Gly378	Met11,Thr8
5	5	Ser313,Tyr384,Ala231,Gly378,Asp375	Thr47,Ile44,Asn24,Met11,Thr8
6	1	His195	Met4
7	6	Asp272,Asp268,Asn258,Asp266,Pro264,Gly247,Asp317	Val7,Lys21,Arg20,Thr17,Met18,Asn24
8	3	Asp268,Asp317,Gly315	Lys6,Arg4
9	3	Thr324,Gly365,Asp371	Thr13,Met14,Lys21
10	3	His225,Ser313,Gly365,Leu364	Met8,Asp23,Ala5,Lys6
Epstein-Barr virus LMP 1 Protein and Nsp9 protein PDB ID 6WXD_B nCoV docking
I
Complex number	No-HBonds	Residues
		LMP1 (Chain Y)	Nsp9 (Chain B)
1	5	Ser211,Tyr385,Glu221,Ser311,Asp312	Gln17,Asn95,Thr18,Lys89
2	7	Gly365,Ser311,Tyr384,Asp386	Val107,Asn93,Gly97,Gly101,Met98,Asn30
3	8	Pro376,Ser383,Gln381,Ser367,Ser369,Asp374,Ser347	Lys55,Lys89,Glu65,Val138,Gly34,Gln17
4	10	Ser367,Gly371,Gln381,Asp386,Gly345,Ser347,Asp341	Lys89,Thr64,Asn95,Tyr63,Trp50,Thr18,Lys55,Thr59
5	8	Thr324,Tyr384,Tyr385,Ser313,Asp372	Arg7,Thr31,Leu6,Val4,Gln8,Lys33
6	4	Glu325,Tyr384,Ser311,Asp386	Val73,Gly97,Asn93,Met98
7	11	Glu325,Tyr385,Tyr384,His352,Asp371,Ser366,Ser369	Arg96,Gly97,Gly101,Asn93,Leu94,Arg71,Val73,Gln110
8	5	Ser383,Gly230,Ser229,Gly345	Ser2,Leu1,Lys33
9	9	Gln381,Ser347,His346,Ser369,Gly343,Asp233	Glu65,Gln17,Thr18,Val38,Lys55,Thr16
10	7	Tyr384,Asp386,Val228,Ser367,Gly365,Asp372	Gly97,Met98,Asn30,Ser2,Ala105,Arg108,Val107
Epstein-Barr virus LMP 1 Protein and Nsp10 PDB ID 6W75_B protein nCoV docking
J
Complex number	No-HBonds	Residues
		LMP1 (Chain Y)	Nsp10 (Chain B)
1	7	Glu325,His352,Gly368,Ser367	Lys76,Cys60,Asn23,Tyr13,Pro20,Gln19
2	9	Ser313,Ser383,Gln381,Tyr384,Tyr385,Ser367,Gly365,Glu325	Asp65,His63,Arg61,Cys62,Asp5
3	2	Tyr385,His35	Cys24,Asn23
4	7	Ser36,Asp372,Tyr385,Glu328,His352,Ser313,Glu325	Gln19,Tyr13,Cys62,Ile21,Asn23,Met27,Lys76
5	5	Ser311,Ser313,Leu363,Ser367	Lys26,Met27,Ans23,Pro20,Gln19
6	5	Asp255,Ser200,Asp257,Pro202,Asn251	Asn23,Lys76,Lys26,Thr41
7	8	Gly365,Asp386,Glu325,Gly371,Thr324,Asn329	Asn97,Lys78,Cys100,Cys113,Asp5,Asp114,Thr101
8	9	Tyr385,Ser383,Tyr384,Gln381,Ser347,His346,Thr324	Ser112,Arg117,Cys113,Glu118,Leu121,Gln122,Val102
9	11	Ser367,Glu325,Hiis352,Leu382,Leu363,Asp372,Ser313	Tyr13,Gln19,Lys76,Asn23,Cys62,Arg61,Val25,Gly52,Met27
10	2	Ser367,Ser313	Lys78,Lys70
Epstein-Barr virus LMP 1 Protein and RdRp (NSP12) PDB 6M71_A protein nCoV docking
K
Complex number	No-HBonds	Residues
		LMP1 (Chain Y)	RdRp (NSP12) (Chain A)
1	6	Ser369,Ser383,Ala231,Ser347	Tyr374,His381,Ser364,Phe368
2	4	Gly232,Gly252,His191,His195	Ser425,Lys417,Lys438,Leu437
3	4	Ser383,Tyr385,Gln381,Ser313	Asp517,Met519,Leu514,Glu522
4	2	Asp386,Leu363	Lys430,Tyr420
5	7	Ser192,Tyr385,Tyr384,Glu325,Thr324,Gly371,Ser366	Leu895,Leu931,Ser913,His928,Arg583
6	5	Ser383,Tyr385,His352,Gly188,Gln381	Ala383,Gly385,Asn386,Val257,Met380
7	9	Asp386,Ser313,His352,Tyr385,Asp372,Asp193,Asp209,Ala231,Glu221	Ser451,Ser672,Gln408,Asn447,Lys411,Lys267,Lys391,Asn403,Tyr265
8	5	Gln381,Asp386,Tyr385,Leu363,Thr324	Glu431,Phe428,Lys430,Tyr420,Lys417
9	4	Glu194,Gln205,Ser229	Trp509,Asn386,Gly385,Ala383
10	3	Asp386,Tyr385,Ser229	Asn507,Asn404
Epstein-Barr virus LMP 1 Protein and NSP13 (helicase) PDB 5RL9_A protein nCoV docking
L
Complex number	No-HBonds	Residues
		LMP1 (Chain Y)	NSP13 (helicase) (Chain A)
1	3	Ser311,Ser313,Asp317	Tyr71
2	6	Tyr385,Ser367,Leu226,His191	Ser69,Asn51,Met68,His75,Tyr93,Cys8
3	9	Asn329,Tyr385,Asp372,Tyr384,Ser313	Gln88,Ser69,Gly66,Tyr71,Gly67,Ser13,Ser44,Ser80,Ile79
4	7	Pro357,Asp333,Gln334,His303,Asp282,Asp268	Tyr71,Gly67,Pro47,Arg22,Ala1,Val2
5	5	Glu325,His352,Tyr385	Ser69,Ile79,Lys76,Ser80,Pro78
6	21	Asp372,Ser366,Leu362,Ser367,Gly368,Tyr384,Asp210,Cys238,Ser311,Ser313,Ala314,Asp312,Gly188,His195,Gln189,Ser192,His225,Leu226	Arg390,Val232,Thr231,Glu365,Ala1,Tyr93,Val2,Ala4,Asn9,Gln11,His75,Tyr71,Ser69,Ser44,Asn46
7	1	Asn316	Tyr93
8	3	Ser367,Thr324	Asn86,Cys84,Pro78
9	11	Gly365,Tyr385,Tyr384,Thr324,Glu325	His75,Lys76,Pro78,Pro77,Ser80,Ile79,Gly66,Met68,Ser69,Leu65,Asn51
10	4	Ser200,Asn251,Gln254,His195	Tyr93,Gly87,Gln88,Gly67
Epstein-Barr virus LMP 1 Protein and exoribonuclease QHD43415_13 protein nCoV docking
M
Complex number	No-HBonds	Residues
		LMP1 (Chain Y)	QHD43415_13 (Chain A)
1	6	Asp386,Tyr384,Asp312,Asp317,Ser313	Tyr491,Ser470,Thr472,Lys469,Gly480,Cys473
2	7	Tyr385,His225,Asp386,Ser192,His195,Ser311	His455,Asn478,Cys452,His487,Asn518,Asn521,Tyr465
3	8	Asp386,Tyr385,His352,Tyr384,Ser367,His187,Arg190	Asn499,Thr472,Ser470,Lys469,Thr516,Thr173
4	8	Ser366,Gly365,Tyr385,Tyr384,Asp386,Asp372,Asp374	Ile502,Leu442,Tyr446,Tyr491,Leu468,Thr472,Arg404
5	2	Asp261,Pro202	Lys200,Gln65
6	5	Asn258,Pro256,Gln265,Thr259,Pro267	Arg525,Gln527,Thr524,Tyr517,Lys469
7	4	Asp386,Ala231,Tyr384,His225	Ser470,Lys469,Gly480,Cys484
8	10	Cys238,Asp386,Asp317,Tyr384,His352,Gly365,Ser366,Ser367	Arg525,Tyr517,Arg476,Asn478,Ser454
9	7	Asp312,Ser311,Ser229,Tyr385,Asp386,Ser383	Tyr517,Leu526,Phe523,Arg476,Gln527
10	9	Tyr384,Tyr385,Asp386,Ser383,Gly230Asp312	Asn478,Arg476,Phe523,Arg525,Gln527,Leu526,Tyr517
Epstein-Barr virus LMP 1 Protein and NSP15 Endoribonuclease PDB_6VWW_A protein nCoV docking
N
Complex number	No-HBonds	Residues
		LMP1 (Chain Y)	NSP15 Endoribonuclease (Chain A)
1	6	Tyr385,Ser383,Ser367,Ser313	Thr31,Asn29,Asn30,Lys35,Asp40,Gly38
2	6	Ser366,Asp386,Tyr384,His352,His195	Asp336,Thr341,His250,Ser316,Glu267
3	3	Ser313,Asp386,Glu325	Asn53,Ser26,Asn46
4	4	Pro280,Asp268,Lys330,Gly319	Ser316,Ala284,Gln285,Thr282
5	7	Asp216,Thr259,Asp266,Pro256,Asn258,Ser200	Lys317,Gln347,Leu346,Tyr343,Trp333,Lys335
6	15	Gly344,Ser347,Gln381,Ser367,Ala231,Gly230,Gly232,Ser366,Arg190,Glu194,Ser369	Ser104,Ser98,Asn53,Thr49,Leu3,Glu4,Cys291,Ser2
7	1	His187	Cys291
8	5	Ala231,Tyr385,Ser383,Ser367,Ser369	Glu4,Ile27,Thr31,Glu42,Asp40
9	6	Asp386,Gln381,Ser383,Tyr385,Tyr384,Thr324	Lys35,Asp40,Thr31
10	2	Tyr385,Gly365	Lys35,Glu42
Epstein-Barr virus LMP 1 Protein and NSP16 2'-O-methyltransferase PDB_6W75_A protein nCoV docking
O
Complex number	No-HBonds	Residues
		LMP1 (Chain Y)	NSP16 2'-O-methyltransferase (Chain A)
1	6	Asp386,Gln381,Ser367,Ser369,Ser366	Ser7038,Tyr7040,Thr6846,Met7045,Gln6885
2	7	Ser367,Arg223,Ser383,Asp386,Tyr385,Leu226,His225	Met6818,Asp7044,Asn7033,Trp7029,Tyr6813,Ser6800
3	4	Asp277,Asp272,Leu227,Gln205	Lys7051,Lys7047,Ser6800
4	9	Ser313,Tyr384,His352,Asp386,Asp372,His225	Met7058,Gly7054,Tyr6861,Arg7081,Asn7083,Arg6864,Lys7051,Asn7084
5	3	His203,His348,Ser229	Arg7077,Asn6862,Tyr6861
6	6	Asp295,His348,Ser347,Leu227,Gln205,Ser200	Gln7064,Val7057,Ser7059,Tyr6861,Leu7052,Ser7046
7	10	Val228,Asp386,Tyr385,Asp210,Glu221,Arg223,Ser313,Ser311	Lys7047,Lys7051,Leu7052,Met7045,Ser6800,Tyr7040,Ser7038,Ala6881,Gln6885
8	5	Ser313,Glu325,Thr324,Asp372,Ser366	Thr7055,Arg7053,Ser7046
9	10	Asn329,Ala314,Asn316,Thr324,Tyr385,Asp386,Glu325,His213,Glu214	Lys7075,Ser7074,Thr6854,Tyr6851,Gln6816,Asn6811,Tyr6813,Trp6988,Ser6800,Tyr7040
10	2	Ser366,Ser367	Arg7014,Trp6988
Epstein-Barr virus LMP 1 Protein and ORF3a PDB_6XDC_A protein nCoV docking
P
Complex number	No-HBonds	Residues
		LMP1 (Chain Y)	ORF3a (Chain A)
1	7	Ser313,Tyr385,Asp386,Asn316,Asp193,Gln189	Ile124,Gln116,Asn119,Trp131,Leu83,Gln70,Thr64
2	1	Pro253	Lys136
3	5	Tyr385,Ser369,Asp255,Asp233,Ser229	Lys136,Trp131,Tyr91,Asn119,Phe79
4	4	Asn251,Gln205	Ser117,Ile118
5	2	Ser347,Asp341	Ala72
6	1	Asp386	Lys136
7	5	Ser366,Ser367,Tyr384,Ser313,Asn316	Tyr107,Tyr109,Ser117,Val121,Tyr206
8	3	Asp284,Asp304,Asn220	Lys136,Trp131,Ala110
9	7	Gly335,His303,Asp284,Asp282,Asp266	Arg134,Arg68,Ala72m,His78,Phe79
10	3	Asn251,Gln205,His187	Tyr206,Asp199
Epstein-Barr virus LMP 1 Protein and Envelope (QHD43418) protein nCoV docking
Q
Complex number	No-HBonds	Residues
		LMP1 (Chain Y)	Envelope (QHD43418) (Chain A)
1	1	Ser369	Leu65
2	7	Leu242,Gly243,Lys330,Asp268,Asp317,Asp266	Ser67,Ser68,Asn48,Arg61,Tyr59,Arg69
3	2	His213,Ser239	Asn66,Tyr59
4	7	Gly335,Glu326,Leu242,Ser309,Asp312,Pro267,Asn269	Asn45,Arg38,Lys63,Tyr59,Tyr57
5	6	Gln292,Asp250,Asn251,Gly230,Gln205,His276	Asn66,Thr30,Arg38,Leu37,Tyr42,Asn45
6	3	Gln205,Ser229	Ala41,Asn45
7	2	Gln292,Gly232	Arg38,Arg69
8	7	Asp284,Pro267,Asn241,Gly335,Asp333,Gln334	Tyr57,Ser60,Tyr59,Cys44,Asn45,Tyr42
9	3	Asp372,Ser192	Arg61,Phe4,Tyr2
10	4	Asp268,Gly243,Leu242	Arg61,Ser68,Ser67
Epstein-Barr virus LMP 1 Protein and M-protein nCoV docking
R
Complex number	No-HBonds	Residues
		LMP1 (Chain Y)	M-protein (Chain A)
1	12	His358,Gly318,Asp304,Ala244,Asn269,Pro267,Gly246,Gly243,Gly247,Asp272,Leu242	Thr127,Leu46,Arg44,Asn41,Tyr39,Arg42,Asn43
2	5	Gln334.Asp268,Asp260,Asn316,Lys330	Thr30,Phe112,Arg198,Arg42,Cys33
3	3	Gln334,Thr259,Asp260	Phe26,Thr130
4	4	Asp284,Asp282,Asp268	Phe37,Arg42,Asn43
5	6	Ser347,Tyr384,Ser367Asp386	Asn41,Thr130,Asn121,Thr127,His125
6	12	Asp295,Asp293,His346,Asp341,Ser347,Asp233,Asn251,Ser200	Arg44,Asn41,Arg42,Tyr39,Phe37,Gln36,Lys50,Gln19
7	12	Lys330,Gln334,Asp304,Gly318,Gly319,Gly247,Asp272,Leu242,Ser215	Ile128,Trp110,Asn41,Phe45,Leu46,Arg42,Asn43,Cys33
8	6	Ser383,Gly344,Ser347,Ser313	Glu115,Tyr178,Asn203,Arg174,Leu56,Val60
9	4	Asp288,Asp255,Asn289	Lys166,Arg200,Leu164
10	7	Asp260,Asp257,Thr259,Asn258,Ser219	Thr106,Arg105,Ala40,Asn41,Leu35,Ala38,Thr30
Epstein-Barr virus LMP 1 Protein and ORF6 (QHD43420) protein nCoV docking
S
Complex number	No-HBonds	Residues
		LMP1 (Chain Y)	ORF6 (QHD43420) (Chain A)
1	0
2	3	Asp312,Pro321,Gly315	Tyr31,Lys38
3	3	Leu363,Thr324,Tyr384	Ser25,Asn28,Trp27
4	2	Tyr385,Ser313	Asn28,Thr21
5	1	Ser229	Asn28
6	2	Asp304,Asn316	Tyr31,Thr21
7	4	Tyr384,Leu363,Tyr385,Asp372	Trp27,Asn28,Lys38
8	3	Thr324,Leu363,Tyr384	Asn28,Ser25,Trp27
9	2	Tyr385,Ser367	Tyr31,Ser25
10	0
Epstein-Barr virus LMP 1 Protein and ORF7A PDB_6w37_A protein nCoV docking
T
Complex number	No-HBonds	Residues
		LMP1 (Chain Y)	ORF7A (Chain A)
1	8	Ser367,Tyr385,Ser311,Asp317,Ser313	Leu2,His58,His4,Tyr5,Arg63
2	5	Glu328,Gly332,Asp333,His377	Glu7,Tyr5,Tyr3,Gln47
3	10	Asp372,Ser366,Gly371,Gly365,Ser367,Tyr385,Thr324	Lys38,Glu18,Lys17,Gln6,Tyr60,His58,His4,Glu7
4	9	Ser366,Tyr385,Ser367,Asp386,Glu325,Ser313	Glu18,Tyr60,His4,His58,Gln61,Arg65,Gln47,Tyr5
5	8	Tyr384,Tyr385,Glu325,Thr324,Ser367,Asp372	Gln47,Leu62,Thr46,Gly27,Cys43,Thr42
6	6	Asn269,Gln334,Asp304,Asp333,His303	Ser45,His32,Thr42,Asn28
7	8	Gly335,Asp304,Asn269,Pro267,Asp268,Asp284	Ser29,Ser45,Ser66,Arg10,Arg63
8	5	Asp372,Asp374,Leu362,His377,Asp375	Arg10,Ser45,Gln47,Arg63
9	6	Asp372,Asp375,Leu362,His377	Arg10,Arg63,Tyr5,Gln61,Gln47
10	7	Asn241,Pro307,Lys330,Asp268,Gly318,Glu326	Arg63,Gln47,Asn28,Arg65,Arg10,Ser45
Epstein-Barr virus LMP 1 Protein and ORF8 PDB_7JX6_A protein nCoV docking
U
Complex number	No-HBonds	Residues
		LMP1 (Chain Y)	ORF8 (Chain A)
1	8	Asp386,Tyr385,Asp372,His225,Leu226,Val228	Lys68,Ser43,Phe86,Val33,Gln29,Ser103,Tyr42
2	3	Ser347,Asp349	Glu110,Tyr105
3
4
5	5	Ser383,Gln381,Tyr384,Asp386,Ser192	Asp107,Tyr111,Tyr46,Gln72
6	1	Asp374	Tyr105
7
8
9	6	Ser383,Ser367,Gln381,Leu363	Phe104,Phe41,Pro38,Asp35,His40
10
Epstein-Barr virus LMP 1 Protein and Nucleocapsid Phosphoprotein_6YUN_A protein nCoV docking
V
Complex number	No-HBonds	Residues
		LMP1 (Chain Y)	Nucleocapsid Phosphoprotein (Chain A)
1	4	Gln254,Asn262,Pro253,Asp255	Thr83,Gln14
2	4	Ser229,Glu194,Gln189,His187	Gly70,Gln14,Thr83,Ser81
3	4	Asp255,Ser217,Asp199	Gln14,Val78,Ile74
4	6	Gln205,Asn251,Asp386,Tyr384,Arg223,Gln381	Pro80,Arg31,Arg30,Glu7,Glu34
5	6	Ser383, Thr324,Asp386,Ala231,Ser313,Glu325	Lys15,Ala65,Met76,Ser66,Thr83,Val78
6	4	Arg223,Ser313,Glu325,Thr324	Glu7,Thr83,Val78,Met76
7	3	Ser200,Asn258,Asn262	Ile74,Thr83,Gln14
8	6	Ala231,Ser383,Ser367,Tyr384	Ala67,Ala65,Ile74,Lys15
9	4	Asp282,Asn300,Asn285,Asp272	Arg16,Arg30,Ser81
10	3	Ser367,Gln381,Glu328	Leu85,Gly75,Lys15
Epstein-Barr virus LMP 1 Protein and ORF9b_6Z4U_A protein nCoV docking
W
Complex number	No-HBonds	Residues
		LMP1 (Chain Y)	Orf9b (Chain A)
1	6	Ser313,Tyr384,His352,Asp386,Ser383	Leu71,Thr72,Asn55,Val76,Leu52
2	2	Ser367,Ser313	Gln70,Ser53
3	4	Lys330,Asp272,Asp271,Asp304	Ala57,Lys97,Ser50
4	5	Asp386,Tyr385,Ser367,Glu325	Phe69,Lys59,Arg58,Ser53
5	5	Asp341,Gly345,His352,Leu382,Ser313	Lys97,Asn55,Ser53,Leu71
6	3	Asp261,His225,Asp255	Lys97,Lys67,Ser50
7	6	Ser367,Gln381,Tyr385,Tyr384,Ser313,Asp295	Ser53,Met56,Leu71,Phe69,Lys67,Lys97
8	5	Tyr385,Ser383,Ser369,Gly344	Thr95,Val93,Gln20,Tyr42
9	4	Tyr385,Ser313,Ser366	Ala57,Thr60,Gln18
10	5	Asp333,Gln334,Gly335,Asp304,Asp272	Asn55,Ser53,Ser50,Lys97
Epstein-Barr virus LMP 1 Protein and Orf10_ QHI42199 protein nCoV docking
X
Complex number	No-HBonds	Residues
		LMP1 (Chain Y)	Orf10_ QHI42199
1	3	Ser200,Asp198,His187	Arg20,Arg24,Met1
2	7	Asp386,Tyr384,Asp317,Ser311,Thr324,Leu226	Met1,Asn25,Tyr26,Arg24,Asp31
3	2	Ser311,Asp317	Tyr3
4	5	Ser383,Tyr385,Tyr384	Thr38,Asn36,Leu37,Thr12
5	6	Asp317,Ser215,His213,Leu242,Thr259	Tyr14,Gly2,Met1,Asn22,Tyr26
6	4	Leu242,Asp268,Gly243,Glu214	Arg20,Val32,Tyr3,Asn25
7	11	Asp317,Ser311,Ser313,Thr324,Gln322,Asp209,Asp210	Arg20,Ile27,Arg24,Tyr26,Tyr3
8	2	Asp250,Gln254	Arg20,Asn5
9	6	Gln334,Gly246,Gly247,Ala244,Asn285	Asn5,Tyr26,Met1
10	3	Asp304,Asp272,Asp266	Asn5,Asp31,Gln29
Epstein-Barr virus LMP 1 Protein and SPIKE_6LZG_B protein nCoV docking
Y
Complex number	No-HBonds	Residues
		LMP1 (Chain Y)	SPIKE_6lzg (Chain B)
1	7	Asp295,Gly342,His358,Pro321,Gly318,Asp299,Thr340	Lys444,Gln498,Tyr489,Phe486,Tyr449,Arg346
2	7	Tyr385,Ser383,Glu325,Ser367,Asn316,Ser313	Phe490,Glu484,Arg403,Thr500,Arg457,Gly496
3	5	Tyr384,Asp386,Ser347,Asp233	Glu484,Lys417,Gly446,Gln498,Thr500
4	8	Asp298,Gln334,Lys330,His377,Asp299,Asn300	Tyr453,Tyr473,Gly476,Thr415,Gly496,Asn501,Tyr449
5	7	Ser369,Ser367,Gly365,His352,Tyr384,Ser313	Ser494,Leu492,Phe490,Tyr489,Asn487
6	5	His352,Gln381,Tyr384,Tyr385	Gln493,Tyr489,Asn487,Lys417
7	7	Tyr384,His352,Asp386,Ser367	Asn487,Tyr489,Tyr421,Leu492,Phe490,Gln493
8	8	Pro376,Asp341,Gly344,Tyr385,Ser229,Gln381	Asn501,Gln498,Lys417,Tyr453,Phe486,Asn487,Glu484
9	5	Gln205,Gly234,His195,His191,Asp198	Arg403,Tyr505,Arg408,Lys378,Pro412
10	5	His225,Val228,Gln205,Asp386	Ser494,Gln493,Gly485,Arg403,Tyr453

## Sheet: S6-PD1_SPIKE
Human PD1 and Sike-RBD docking
Complex number	No-HBonds	Residues
		Spike (Chain B)	PD1 (Chain G)
1	4	Lys417,Asn487,Tyr505	Ala40, Thr53,His107,Val97
2	8	Tyr449,Tyr505,Arg403,Tyr453,Tyr489,Cys488,Glu484	Trp32, Thr36,Thr53, Ser55, Asn58,Arg104,Asp105,His107, Glu136,Lys135
3	1	Gly446	Gln99
4	5	Tyr505,Gly446,Gly502,Ser477,Thr478	Asp48,Asn49,Glu61, Arg112
5	7	Gly496,Gln498,Thr500,Tyr449,Tyr505,Leu492,Gly446	Ala40, Pro72, Asn74,Thr120, Glu136,Arg139
6	6	Asp405,Tyr495,Ser494,Gln493,Thr500,Glu406,Lys417	Asp48, Asn49, Glu84,Thr98, Met108, Arg112
7	6	Tyr489,Tyr449,Gln498,Glu484,Gln493	Phe63,Tyr68, Lys78,Leu100,Pro101,Ser127,Ala129
8	10	Gln493,Phe490,Tyr505,Phe486,Tyr449,Gly446	Ser71,Ser73, Gln75, Asp77,Lys78,Arg94,Ile126
9	8	Arg403,Val503,Tyr489,Phe490,Gln493,Tyr453,Arg408	Asp26,Pro130, Ile134,Glu136,Arg139
10	7	Glu484,Asn487,Tyr489,Gln493,Lys417,Tyr505	Trp32,Phe37,Leu41,Thr51,Ser55,Asp105, Val43
	PD1-pembrolizumab: Phe63, Asn66, Thr76, Lys78, Glu84, Ser87, Gly90, Lys131, Ala132
	PD1-nivolumab: Leu25, Ser27, Pro28, Asp29, Arg30, Thr59, Ser60, Leu128, Ala129, Prp130, Lys131, Ala132
